# Supplementary material for: TETRASPANIN 8-1 from Phaseolus vulgaris plays a key role during mutualistic interactions
Source: Frontiers journal article supplement (doi:10.3389/fpls.2023.1152493), 2023-07-03
Supplement: Data_Sheet_1.zip [file Data_Sheet_1.zip]

| TET identity                       |                      |           |            |           |                  |
|------------------------------------|----------------------|-----------|------------|-----------|------------------|
| Gene ID                            | Species              | E-value   | % identity | Align len | Query ID         |
| Lj2g0015394.1                      | L.japonicus Lj1.0v1  | 1.45E-119 | 70         | 269       | AtTET1 AT5G46700 |
| Glyma.09G205400.1.p                | G.max Wm82.a4.v1     | 1.37E-116 | 70         | 269       | AtTET1 AT5G46700 |
| Medtr8g066790.1                    | M.truncatula Mt4.0v1 | 2.16E-114 | 70         | 269       | AtTET1 AT5G46700 |
| Lcu.2RBY.7g030120.1                | L.culinaris v1       | 3.35E-112 | 67         | 269       | AtTET1 AT5G46700 |
| Glyma.01G095700.1.p                | G.max Wm82.a4.v1     | 1.15E-111 | 68         | 269       | AtTET1 AT5G46700 |
| Ca_11504                           | C.arietinum v1.0     | 3.29E-111 | 67         | 269       | AtTET1 AT5G46700 |
| Medtr5g030070.1                    | M.truncatula Mt4.0v1 | 1.01E-110 | 68         | 269       | AtTET1 AT5G46700 |
| Phvul.002G140500.1.p               | P.vulgaris v2.1      | 3.37E-110 | 68         | 269       | AtTET1 AT5G46700 |
| Lj4g0026647.1                      | L.japonicus Lj1.0v1  | 1.7E-109  | 67         | 269       | AtTET1 AT5G46700 |
| Lcu.2RBY.5g015480.1                | L.culinaris v1       | 7.86E-109 | 67         | 269       | AtTET1 AT5G46700 |
| Phvul.003G284700.1.p               | P.vulgaris v2.1      | 1.43E-106 | 64         | 269       | AtTET1 AT5G46700 |
| arahy.Tifrunner.gnm1.ann1.QC8A1V.1 | A.hypogaea v1.0      | 2.32E-80  | 57         | 269       | AtTET1 AT5G46700 |
| arahy.Tifrunner.gnm1.ann1.EEBB9D.1 | A.hypogaea v1.0      | 2.32E-80  | 57         | 269       | AtTET1 AT5G46700 |
| Ca_05887                           | C.arietinum v1.0     | 2.43E-75  | 49         | 269       | AtTET1 AT5G46700 |
| Lj4g0027264.1                      | L.japonicus Lj1.0v1  | 2.39E-73  | 50         | 269       | AtTET1 AT5G46700 |
| Phvul.002G304100.1.p               | P.vulgaris v2.1      | 7.17E-73  | 49         | 269       | AtTET1 AT5G46700 |
| Glyma.08G029100.1.p                | G.max Wm82.a4.v1     | 7.91E-72  | 50         | 269       | AtTET1 AT5G46700 |
| arahy.Tifrunner.gnm1.ann1.EM0Y56.1 | A.hypogaea v1.0      | 8.25E-72  | 49         | 267       | AtTET1 AT5G46700 |
| arahy.Tifrunner.gnm1.ann1.N28W6S.1 | A.hypogaea v1.0      | 1.44E-71  | 49         | 267       | AtTET1 AT5G46700 |
| Lcu.2RBY.4g078330.1                | L.culinaris v1       | 2.42E-70  | 48         | 269       | AtTET1 AT5G46700 |
| Medtr8g101600.1                    | M.truncatula Mt4.0v1 | 4.04E-70  | 48         | 269       | AtTET1 AT5G46700 |
| Phvul.004G171300.1.p               | P.vulgaris v2.1      | 3.46E-68  | 49         | 269       | AtTET1 AT5G46700 |
| Phvul.011G072100.1.p               | P.vulgaris v2.1      | 7.49E-64  | 46         | 273       | AtTET1 AT5G46700 |
| arahy.Tifrunner.gnm1.ann1.B859HK.1 | A.hypogaea v1.0      | 7.87E-64  | 46         | 265       | AtTET1 AT5G46700 |
| arahy.Tifrunner.gnm1.ann1.LZE6LN.1 | A.hypogaea v1.0      | 8.68E-62  | 44         | 269       | AtTET1 AT5G46700 |
| arahy.Tifrunner.gnm1.ann1.PNW690.1 | A.hypogaea v1.0      | 1.36E-61  | 47         | 231       | AtTET1 AT5G46700 |
| Glyma.07G129100.1.p                | G.max Wm82.a4.v1     | 2.33E-61  | 47         | 273       | AtTET1 AT5G46700 |
| Glyma.13G091000.1.p                | G.max Wm82.a4.v1     | 7.91E-61  | 46         | 261       | AtTET1 AT5G46700 |
| Phvul.003G151800.1.p               | P.vulgaris v2.1      | 4.26E-60  | 46         | 260       | AtTET1 AT5G46700 |
| arahy.Tifrunner.gnm1.ann1.AUDB51.1 | A.hypogaea v1.0      | 5.11E-60  | 45         | 273       | AtTET1 AT5G46700 |
| Glyma.12G072100.1.p                | G.max Wm82.a4.v1     | 6.21E-60  | 46         | 273       | AtTET1 AT5G46700 |
| arahy.Tifrunner.gnm1.ann1.JZ8XUN.1 | A.hypogaea v1.0      | 7.47E-60  | 45         | 273       | AtTET1 AT5G46700 |
| Glyma.11G152124.1.p                | G.max Wm82.a4.v1     | 4.59E-59  | 46         | 273       | AtTET1 AT5G46700 |
| Lcu.2RBY.7g075810.1                | L.culinaris v1       | 1.6E-58   | 45         | 265       | AtTET1 AT5G46700 |
| Lcu.2RBY.4g032690.1                | L.culinaris v1       | 1.95E-58  | 47         | 235       | AtTET1 AT5G46700 |

|                                    |                      |          |    |     |                  |
|------------------------------------|----------------------|----------|----|-----|------------------|
| Lj2g0020248.1                      | L.japonicus Lj1.0v1  | 2.18E-58 | 48 | 226 | AtTET1 AT5G46700 |
| Ca_14606                           | C.arietinum v1.0     | 2.37E-58 | 45 | 273 | AtTET1 AT5G46700 |
| Medtr4g129670.1                    | M.truncatula Mt4.0v1 | 6E-58    | 46 | 267 | AtTET1 AT5G46700 |
| arahy.Tifrunner.gnm1.ann1.9I36N1.1 | A.hypogaea v1.0      | 9.84E-58 | 46 | 260 | AtTET1 AT5G46700 |
| arahy.Tifrunner.gnm1.ann1.V2Z0GB.1 | A.hypogaea v1.0      | 9.84E-58 | 46 | 260 | AtTET1 AT5G46700 |
| Lj4g0025241.1                      | L.japonicus Lj1.0v1  | 1.05E-57 | 45 | 262 | AtTET1 AT5G46700 |
| Medtr4g061010.1                    | M.truncatula Mt4.0v1 | 1.32E-57 | 47 | 235 | AtTET1 AT5G46700 |
| Glyma.17G069300.1.p                | G.max Wm82.a4.v1     | 1.9E-57  | 45 | 262 | AtTET1 AT5G46700 |
| Lj3g0001285.1                      | L.japonicus Lj1.0v1  | 2.45E-56 | 45 | 274 | AtTET1 AT5G46700 |
| Glyma.13G328700.1.p                | G.max Wm82.a4.v1     | 1.18E-55 | 42 | 238 | AtTET1 AT5G46700 |
| Lj6g0020177.1                      | L.japonicus Lj1.0v1  | 4.81E-54 | 46 | 260 | AtTET1 AT5G46700 |
| Medtr6g033335.1                    | M.truncatula Mt4.0v1 | 4.42E-53 | 43 | 257 | AtTET1 AT5G46700 |
| Phvul.005G137500.1.p               | P.vulgaris v2.1      | 1.7E-52  | 44 | 237 | AtTET1 AT5G46700 |
| Lj2g0026181.1                      | L.japonicus Lj1.0v1  | 1.17E-51 | 43 | 257 | AtTET1 AT5G46700 |
| arahy.Tifrunner.gnm1.ann1.0ZGE19.1 | A.hypogaea v1.0      | 1.9E-51  | 41 | 269 | AtTET1 AT5G46700 |
| Glyma.20G178700.1.p                | G.max Wm82.a4.v1     | 2.35E-50 | 43 | 264 | AtTET1 AT5G46700 |
| arahy.Tifrunner.gnm1.ann1.K1NV0H.1 | A.hypogaea v1.0      | 6.26E-50 | 61 | 127 | AtTET1 AT5G46700 |
| Lj5g0000955.1                      | L.japonicus Lj1.0v1  | 8E-50    | 43 | 264 | AtTET1 AT5G46700 |
| Glyma.10G212400.1.p                | G.max Wm82.a4.v1     | 9.51E-50 | 43 | 264 | AtTET1 AT5G46700 |
| Lcu.2RBY.2g046220.1                | L.culinaris v1       | 1.71E-49 | 43 | 254 | AtTET1 AT5G46700 |
| arahy.Tifrunner.gnm1.ann1.Z4U2NE.1 | A.hypogaea v1.0      | 1.74E-49 | 42 | 266 | AtTET1 AT5G46700 |
| Phvul.004G071900.1.p               | P.vulgaris v2.1      | 4.1E-49  | 44 | 254 | AtTET1 AT5G46700 |
| Phvul.007G093400.1.p               | P.vulgaris v2.1      | 2.36E-48 | 42 | 264 | AtTET1 AT5G46700 |
| arahy.Tifrunner.gnm1.ann1.Z77BB1.1 | A.hypogaea v1.0      | 3.38E-48 | 42 | 266 | AtTET1 AT5G46700 |
| Glyma.16G145400.1.p                | G.max Wm82.a4.v1     | 6.84E-48 | 42 | 254 | AtTET1 AT5G46700 |
| Phvul.009G207500.1.p               | P.vulgaris v2.1      | 5E-47    | 42 | 255 | AtTET1 AT5G46700 |
| Ca_08501                           | C.arietinum v1.0     | 7.82E-47 | 41 | 264 | AtTET1 AT5G46700 |
| Glyma.04G147100.1.p                | G.max Wm82.a4.v1     | 6.34E-46 | 42 | 255 | AtTET1 AT5G46700 |
| Glyma.02G063700.1.p                | G.max Wm82.a4.v1     | 2.31E-45 | 41 | 254 | AtTET1 AT5G46700 |
| Lcu.2RBY.1g046720.1                | L.culinaris v1       | 2.78E-45 | 40 | 264 | AtTET1 AT5G46700 |
| Medtr1g095530.1                    | M.truncatula Mt4.0v1 | 5.33E-45 | 42 | 264 | AtTET1 AT5G46700 |
| Phvul.002G287500.1.p               | P.vulgaris v2.1      | 7.15E-44 | 39 | 246 | AtTET1 AT5G46700 |
| Glyma.05G205600.1.p                | G.max Wm82.a4.v1     | 8.49E-43 | 39 | 246 | AtTET1 AT5G46700 |
| arahy.Tifrunner.gnm1.ann1.8QTZ72.1 | A.hypogaea v1.0      | 1.04E-42 | 37 | 255 | AtTET1 AT5G46700 |
| Lcu.2RBY.4g075230.1                | L.culinaris v1       | 1.39E-41 | 38 | 256 | AtTET1 AT5G46700 |
| arahy.Tifrunner.gnm1.ann1.XJXR2L.1 | A.hypogaea v1.0      | 2.18E-41 | 38 | 253 | AtTET1 AT5G46700 |
| Ca_03295                           | C.arietinum v1.0     | 6.7E-41  | 44 | 243 | AtTET1 AT5G46700 |

|                                    |                      |           |    |     |                  |
|------------------------------------|----------------------|-----------|----|-----|------------------|
| Glyma.08G012500.2.p                | G.max Wm82.a4.v1     | 8.92E-41  | 38 | 246 | AtTET1 AT5G46700 |
| arahy.Tifrunner.gnm1.ann1.2A0H1U.1 | A.hypogaea v1.0      | 1.43E-40  | 38 | 253 | AtTET1 AT5G46700 |
| Medtr8g097280.1                    | M.truncatula Mt4.0v1 | 1.51E-40  | 38 | 218 | AtTET1 AT5G46700 |
| Phvul.003G180300.1.p               | P.vulgaris v2.1      | 3.2E-40   | 35 | 260 | AtTET1 AT5G46700 |
| Glyma.05G016200.1.p                | G.max Wm82.a4.v1     | 1.99E-39  | 34 | 261 | AtTET1 AT5G46700 |
| Glyma.17G084000.1.p                | G.max Wm82.a4.v1     | 4.42E-39  | 33 | 261 | AtTET1 AT5G46700 |
| arahy.Tifrunner.gnm1.ann1.A2QH6A.1 | A.hypogaea v1.0      | 3.31E-38  | 37 | 255 | AtTET1 AT5G46700 |
| Lj4g0013226.1                      | L.japonicus Lj1.0v1  | 1.87E-37  | 38 | 247 | AtTET1 AT5G46700 |
| arahy.Tifrunner.gnm1.ann1.T23S8A.1 | A.hypogaea v1.0      | 2.9E-37   | 35 | 272 | AtTET1 AT5G46700 |
| Medtr4g112570.1                    | M.truncatula Mt4.0v1 | 5.73E-36  | 36 | 255 | AtTET1 AT5G46700 |
| arahy.Tifrunner.gnm1.ann1.4R894K.1 | A.hypogaea v1.0      | 6.61E-36  | 39 | 254 | AtTET1 AT5G46700 |
| arahy.Tifrunner.gnm1.ann1.Z53AND.1 | A.hypogaea v1.0      | 7.01E-36  | 34 | 272 | AtTET1 AT5G46700 |
| arahy.Tifrunner.gnm1.ann1.H32RIC.1 | A.hypogaea v1.0      | 1.26E-35  | 40 | 166 | AtTET1 AT5G46700 |
| Lcu.2RBY.7g063730.1                | L.culinaris v1       | 1.7E-34   | 34 | 260 | AtTET1 AT5G46700 |
| Ca_06587                           | C.arietinum v1.0     | 3.8E-34   | 36 | 255 | AtTET1 AT5G46700 |
| arahy.Tifrunner.gnm1.ann1.D9WPRA.1 | A.hypogaea v1.0      | 4.52E-34  | 39 | 254 | AtTET1 AT5G46700 |
| Ca_05724                           | C.arietinum v1.0     | 1.24E-33  | 34 | 246 | AtTET1 AT5G46700 |
| Lj4g0018138.1                      | L.japonicus Lj1.0v1  | 1.59E-33  | 35 | 254 | AtTET1 AT5G46700 |
| Glyma.04G144500.1.p                | G.max Wm82.a4.v1     | 8.71E-32  | 32 | 258 | AtTET1 AT5G46700 |
| Glyma.15G207300.1.p                | G.max Wm82.a4.v1     | 1.46E-31  | 33 | 258 | AtTET1 AT5G46700 |
| arahy.Tifrunner.gnm1.ann1.8RU08H.1 | A.hypogaea v1.0      | 3.59E-29  | 39 | 166 | AtTET1 AT5G46700 |
| Lj1g0003076.1                      | L.japonicus Lj1.0v1  | 3.63E-29  | 31 | 274 | AtTET1 AT5G46700 |
| Medtr2g056130.1                    | M.truncatula Mt4.0v1 | 9.53E-29  | 35 | 220 | AtTET1 AT5G46700 |
| Ca_23646                           | C.arietinum v1.0     | 1.9E-28   | 41 | 159 | AtTET1 AT5G46700 |
| Glyma.17G069300.2.p                | G.max Wm82.a4.v1     | 1.42E-27  | 43 | 167 | AtTET1 AT5G46700 |
| Phvul.009G191200.1.p               | P.vulgaris v2.1      | 2.21E-25  | 31 | 259 | AtTET1 AT5G46700 |
| Ca_25832                           | C.arietinum v1.0     | 9.19E-25  | 34 | 232 | AtTET1 AT5G46700 |
| Glyma.08G029100.1.p                | G.max Wm82.a4.v1     | 1.14E-107 | 75 | 252 | AtTET2 AT2G19580 |
| Phvul.002G304100.1.p               | P.vulgaris v2.1      | 7.59E-104 | 71 | 252 | AtTET2 AT2G19580 |
| arahy.Tifrunner.gnm1.ann1.N28W6S.1 | A.hypogaea v1.0      | 1.03E-103 | 71 | 252 | AtTET2 AT2G19580 |
| arahy.Tifrunner.gnm1.ann1.EM0Y56.1 | A.hypogaea v1.0      | 1.06E-103 | 71 | 252 | AtTET2 AT2G19580 |
| Ca_05887                           | C.arietinum v1.0     | 1.96E-103 | 71 | 252 | AtTET2 AT2G19580 |
| Lcu.2RBY.4g078330.1                | L.culinaris v1       | 2.67E-103 | 71 | 252 | AtTET2 AT2G19580 |
| Medtr8g101600.1                    | M.truncatula Mt4.0v1 | 1.07E-102 | 71 | 252 | AtTET2 AT2G19580 |
| Glyma.07G129100.1.p                | G.max Wm82.a4.v1     | 2.65E-102 | 68 | 255 | AtTET2 AT2G19580 |
| Lj4g0027264.1                      | L.japonicus Lj1.0v1  | 8.45E-100 | 69 | 252 | AtTET2 AT2G19580 |
| Phvul.004G171300.1.p               | P.vulgaris v2.1      | 1.35E-99  | 67 | 252 | AtTET2 AT2G19580 |

|                                    |                      |          |    |     |                  |
|------------------------------------|----------------------|----------|----|-----|------------------|
| arahy.Tifrunner.gnm1.ann1.B859HK.1 | A.hypogaea v1.0      | 4.1E-99  | 68 | 248 | AtTET2 AT2G19580 |
| arahy.Tifrunner.gnm1.ann1.PNW690.1 | A.hypogaea v1.0      | 2.93E-93 | 71 | 214 | AtTET2 AT2G19580 |
| Lj2g0020248.1                      | L.japonicus Lj1.0v1  | 1.59E-90 | 70 | 209 | AtTET2 AT2G19580 |
| Lj2g0015394.1                      | L.japonicus Lj1.0v1  | 1.99E-79 | 56 | 251 | AtTET2 AT2G19580 |
| Glyma.01G095700.1.p                | G.max Wm82.a4.v1     | 3.55E-79 | 55 | 251 | AtTET2 AT2G19580 |
| Lcu.2RBY.5g015480.1                | L.culinaris v1       | 7.6E-79  | 58 | 251 | AtTET2 AT2G19580 |
| Ca_11504                           | C.arietinum v1.0     | 1.57E-77 | 57 | 251 | AtTET2 AT2G19580 |
| Glyma.09G205400.1.p                | G.max Wm82.a4.v1     | 1.72E-76 | 58 | 251 | AtTET2 AT2G19580 |
| Medtr8g066790.1                    | M.truncatula Mt4.0v1 | 2.29E-74 | 53 | 251 | AtTET2 AT2G19580 |
| Medtr5g030070.1                    | M.truncatula Mt4.0v1 | 3.99E-74 | 59 | 251 | AtTET2 AT2G19580 |
| Phvul.003G284700.1.p               | P.vulgaris v2.1      | 6.86E-74 | 53 | 251 | AtTET2 AT2G19580 |
| Lcu.2RBY.7g030120.1                | L.culinaris v1       | 3.75E-72 | 53 | 249 | AtTET2 AT2G19580 |
| Lj4g0026647.1                      | L.japonicus Lj1.0v1  | 7.27E-72 | 53 | 251 | AtTET2 AT2G19580 |
| Phvul.002G140500.1.p               | P.vulgaris v2.1      | 1.21E-70 | 55 | 251 | AtTET2 AT2G19580 |
| arahy.Tifrunner.gnm1.ann1.QC8A1V.1 | A.hypogaea v1.0      | 6.51E-54 | 46 | 251 | AtTET2 AT2G19580 |
| arahy.Tifrunner.gnm1.ann1.EEBB9D.1 | A.hypogaea v1.0      | 6.51E-54 | 46 | 251 | AtTET2 AT2G19580 |
| Ca_14606                           | C.arietinum v1.0     | 1.72E-53 | 46 | 247 | AtTET2 AT2G19580 |
| Phvul.011G072100.1.p               | P.vulgaris v2.1      | 2.15E-53 | 45 | 247 | AtTET2 AT2G19580 |
| Medtr4g061010.1                    | M.truncatula Mt4.0v1 | 1.98E-52 | 46 | 248 | AtTET2 AT2G19580 |
| arahy.Tifrunner.gnm1.ann1.LZE6LN.1 | A.hypogaea v1.0      | 1E-51    | 43 | 252 | AtTET2 AT2G19580 |
| Glyma.12G072100.1.p                | G.max Wm82.a4.v1     | 1.86E-51 | 45 | 247 | AtTET2 AT2G19580 |
| Glyma.11G152124.1.p                | G.max Wm82.a4.v1     | 1.22E-49 | 45 | 248 | AtTET2 AT2G19580 |
| Glyma.13G091000.1.p                | G.max Wm82.a4.v1     | 1.27E-48 | 45 | 246 | AtTET2 AT2G19580 |
| Lj3g0001285.1                      | L.japonicus Lj1.0v1  | 1.91E-48 | 45 | 249 | AtTET2 AT2G19580 |
| Lj4g0025241.1                      | L.japonicus Lj1.0v1  | 4.91E-48 | 44 | 245 | AtTET2 AT2G19580 |
| Lcu.2RBY.7g075810.1                | L.culinaris v1       | 6.51E-48 | 44 | 245 | AtTET2 AT2G19580 |
| Lcu.2RBY.4g032690.1                | L.culinaris v1       | 2.3E-47  | 44 | 248 | AtTET2 AT2G19580 |
| arahy.Tifrunner.gnm1.ann1.JZ8XUN.1 | A.hypogaea v1.0      | 8.06E-47 | 43 | 247 | AtTET2 AT2G19580 |
| Lj6g0020177.1                      | L.japonicus Lj1.0v1  | 1.54E-46 | 43 | 246 | AtTET2 AT2G19580 |
| arahy.Tifrunner.gnm1.ann1.9I36N1.1 | A.hypogaea v1.0      | 1.58E-46 | 45 | 245 | AtTET2 AT2G19580 |
| arahy.Tifrunner.gnm1.ann1.V2Z0GB.1 | A.hypogaea v1.0      | 1.58E-46 | 45 | 245 | AtTET2 AT2G19580 |
| arahy.Tifrunner.gnm1.ann1.AUDB51.1 | A.hypogaea v1.0      | 1.96E-46 | 43 | 247 | AtTET2 AT2G19580 |
| Lj5g0000955.1                      | L.japonicus Lj1.0v1  | 6.88E-46 | 43 | 242 | AtTET2 AT2G19580 |
| Phvul.003G151800.1.p               | P.vulgaris v2.1      | 1.12E-45 | 44 | 245 | AtTET2 AT2G19580 |
| arahy.Tifrunner.gnm1.ann1.K1NV0H.1 | A.hypogaea v1.0      | 3.33E-45 | 60 | 128 | AtTET2 AT2G19580 |
| Glyma.16G145400.1.p                | G.max Wm82.a4.v1     | 9.8E-45  | 45 | 239 | AtTET2 AT2G19580 |
| Glyma.17G069300.1.p                | G.max Wm82.a4.v1     | 1.23E-44 | 43 | 246 | AtTET2 AT2G19580 |

|                                    |                      |          |    |     |                  |
|------------------------------------|----------------------|----------|----|-----|------------------|
| arahy.Tifrunner.gnm1.ann1.Z4U2NE.1 | A.hypogaea v1.0      | 1.47E-44 | 41 | 242 | AtTET2 AT2G19580 |
| Medtr4g129670.1                    | M.truncatula Mt4.0v1 | 2.49E-44 | 44 | 250 | AtTET2 AT2G19580 |
| Glyma.13G328700.1.p                | G.max Wm82.a4.v1     | 9.14E-44 | 39 | 244 | AtTET2 AT2G19580 |
| arahy.Tifrunner.gnm1.ann1.Z77BB1.1 | A.hypogaea v1.0      | 1.47E-43 | 41 | 242 | AtTET2 AT2G19580 |
| Glyma.10G212400.1.p                | G.max Wm82.a4.v1     | 6.09E-43 | 42 | 242 | AtTET2 AT2G19580 |
| Medtr1g095530.1                    | M.truncatula Mt4.0v1 | 6.09E-43 | 40 | 249 | AtTET2 AT2G19580 |
| Medtr6g033335.1                    | M.truncatula Mt4.0v1 | 3.67E-42 | 40 | 242 | AtTET2 AT2G19580 |
| Ca_08501                           | C.arietinum v1.0     | 6.32E-42 | 41 | 242 | AtTET2 AT2G19580 |
| Lj2g0026181.1                      | L.japonicus Lj1.0v1  | 7.21E-42 | 41 | 242 | AtTET2 AT2G19580 |
| Glyma.20G178700.1.p                | G.max Wm82.a4.v1     | 9.9E-42  | 40 | 249 | AtTET2 AT2G19580 |
| Lcu.2RBY.1g046720.1                | L.culinaris v1       | 2.07E-41 | 43 | 239 | AtTET2 AT2G19580 |
| Glyma.02G063700.1.p                | G.max Wm82.a4.v1     | 3.07E-41 | 42 | 239 | AtTET2 AT2G19580 |
| Phvul.007G093400.1.p               | P.vulgaris v2.1      | 3.07E-41 | 40 | 242 | AtTET2 AT2G19580 |
| Glyma.04G147100.1.p                | G.max Wm82.a4.v1     | 4.7E-41  | 42 | 240 | AtTET2 AT2G19580 |
| Phvul.004G071900.1.p               | P.vulgaris v2.1      | 6.34E-41 | 41 | 239 | AtTET2 AT2G19580 |
| arahy.Tifrunner.gnm1.ann1.0ZGE19.1 | A.hypogaea v1.0      | 1.6E-40  | 38 | 252 | AtTET2 AT2G19580 |
| Lcu.2RBY.2g046220.1                | L.culinaris v1       | 6.07E-40 | 41 | 239 | AtTET2 AT2G19580 |
| Phvul.009G207500.1.p               | P.vulgaris v2.1      | 1.49E-38 | 42 | 240 | AtTET2 AT2G19580 |
| Phvul.005G137500.1.p               | P.vulgaris v2.1      | 5.05E-38 | 38 | 244 | AtTET2 AT2G19580 |
| Ca_03295                           | C.arietinum v1.0     | 1.32E-37 | 44 | 238 | AtTET2 AT2G19580 |
| Medtr8g097280.1                    | M.truncatula Mt4.0v1 | 1.08E-36 | 37 | 212 | AtTET2 AT2G19580 |
| arahy.Tifrunner.gnm1.ann1.2A0H1U.1 | A.hypogaea v1.0      | 2.33E-36 | 35 | 239 | AtTET2 AT2G19580 |
| Phvul.003G180300.1.p               | P.vulgaris v2.1      | 7.2E-36  | 34 | 243 | AtTET2 AT2G19580 |
| Glyma.17G084000.1.p                | G.max Wm82.a4.v1     | 7.21E-36 | 33 | 244 | AtTET2 AT2G19580 |
| Medtr4g112570.1                    | M.truncatula Mt4.0v1 | 7.69E-36 | 34 | 240 | AtTET2 AT2G19580 |
| Phvul.002G287500.1.p               | P.vulgaris v2.1      | 7.71E-36 | 36 | 239 | AtTET2 AT2G19580 |
| arahy.Tifrunner.gnm1.ann1.XJXR2L.1 | A.hypogaea v1.0      | 7.82E-36 | 35 | 239 | AtTET2 AT2G19580 |
| Lcu.2RBY.7g063730.1                | L.culinaris v1       | 1.05E-35 | 32 | 239 | AtTET2 AT2G19580 |
| Lj4g0018138.1                      | L.japonicus Lj1.0v1  | 1.2E-35  | 33 | 246 | AtTET2 AT2G19580 |
| Glyma.05G205600.1.p                | G.max Wm82.a4.v1     | 1.94E-35 | 35 | 239 | AtTET2 AT2G19580 |
| Lcu.2RBY.4g075230.1                | L.culinaris v1       | 6.51E-35 | 34 | 239 | AtTET2 AT2G19580 |
| Glyma.08G012500.2.p                | G.max Wm82.a4.v1     | 1.62E-34 | 35 | 239 | AtTET2 AT2G19580 |
| Glyma.05G016200.1.p                | G.max Wm82.a4.v1     | 6.86E-34 | 32 | 244 | AtTET2 AT2G19580 |
| arahy.Tifrunner.gnm1.ann1.T23S8A.1 | A.hypogaea v1.0      | 9.01E-34 | 35 | 234 | AtTET2 AT2G19580 |
| Ca_06587                           | C.arietinum v1.0     | 1.02E-33 | 33 | 234 | AtTET2 AT2G19580 |
| arahy.Tifrunner.gnm1.ann1.Z53AND.1 | A.hypogaea v1.0      | 1.63E-33 | 34 | 235 | AtTET2 AT2G19580 |
| arahy.Tifrunner.gnm1.ann1.8QTZ72.1 | A.hypogaea v1.0      | 7.38E-33 | 40 | 242 | AtTET2 AT2G19580 |

|                                    |                      |           |    |     |                  |
|------------------------------------|----------------------|-----------|----|-----|------------------|
| Lj4g0013226.1                      | L.japonicus Lj1.0v1  | 1.24E-31  | 36 | 239 | AtTET2 AT2G19580 |
| arahy.Tifrunner.gnm1.ann1.A2QH6A.1 | A.hypogaea v1.0      | 1.04E-30  | 36 | 239 | AtTET2 AT2G19580 |
| arahy.Tifrunner.gnm1.ann1.4R894K.1 | A.hypogaea v1.0      | 4.12E-30  | 37 | 239 | AtTET2 AT2G19580 |
| Glyma.04G144500.1.p                | G.max Wm82.a4.v1     | 4.4E-29   | 34 | 243 | AtTET2 AT2G19580 |
| Medtr2g056130.1                    | M.truncatula Mt4.0v1 | 8.8E-29   | 31 | 223 | AtTET2 AT2G19580 |
| Glyma.15G207300.1.p                | G.max Wm82.a4.v1     | 9.26E-29  | 34 | 243 | AtTET2 AT2G19580 |
| Ca_23646                           | C.arietinum v1.0     | 1.1E-27   | 41 | 148 | AtTET2 AT2G19580 |
| arahy.Tifrunner.gnm1.ann1.H32RIC.1 | A.hypogaea v1.0      | 4.77E-27  | 38 | 133 | AtTET2 AT2G19580 |
| Ca_25832                           | C.arietinum v1.0     | 5.41E-27  | 32 | 229 | AtTET2 AT2G19580 |
| arahy.Tifrunner.gnm1.ann1.D9WPRA.1 | A.hypogaea v1.0      | 5.93E-26  | 36 | 239 | AtTET2 AT2G19580 |
| Lcu.2RBY.2g064540.1                | L.culinaris v1       | 5.95E-26  | 33 | 224 | AtTET2 AT2G19580 |
| Lj1g0003076.1                      | L.japonicus Lj1.0v1  | 1.86E-25  | 30 | 258 | AtTET2 AT2G19580 |
| Ca_05724                           | C.arietinum v1.0     | 1.79E-24  | 35 | 162 | AtTET2 AT2G19580 |
| Phvul.009G191200.1.p               | P.vulgaris v2.1      | 3.05E-22  | 32 | 244 | AtTET2 AT2G19580 |
| arahy.Tifrunner.gnm1.ann1.8RU08H.1 | A.hypogaea v1.0      | 7.21E-20  | 34 | 133 | AtTET2 AT2G19580 |
| Medtr4g061010.1                    | M.truncatula Mt4.0v1 | 3.23E-143 | 78 | 285 | AtTET3 AT3G45600 |
| Phvul.011G072100.1.p               | P.vulgaris v2.1      | 2E-141    | 76 | 285 | AtTET3 AT3G45600 |
| Ca_14606                           | C.arietinum v1.0     | 2.93E-140 | 78 | 285 | AtTET3 AT3G45600 |
| Lcu.2RBY.4g032690.1                | L.culinaris v1       | 1.21E-138 | 75 | 285 | AtTET3 AT3G45600 |
| Lj3g0001285.1                      | L.japonicus Lj1.0v1  | 2.53E-138 | 78 | 286 | AtTET3 AT3G45600 |
| Glyma.12G072100.1.p                | G.max Wm82.a4.v1     | 1.03E-137 | 76 | 285 | AtTET3 AT3G45600 |
| Glyma.11G152124.1.p                | G.max Wm82.a4.v1     | 2.57E-137 | 76 | 285 | AtTET3 AT3G45600 |
| arahy.Tifrunner.gnm1.ann1.LZE6LN.1 | A.hypogaea v1.0      | 3.99E-135 | 74 | 285 | AtTET3 AT3G45600 |
| arahy.Tifrunner.gnm1.ann1.AUDB51.1 | A.hypogaea v1.0      | 2.22E-134 | 74 | 285 | AtTET3 AT3G45600 |
| arahy.Tifrunner.gnm1.ann1.JZ8XUN.1 | A.hypogaea v1.0      | 3.07E-133 | 73 | 285 | AtTET3 AT3G45600 |
| Glyma.13G328700.1.p                | G.max Wm82.a4.v1     | 2.86E-121 | 70 | 281 | AtTET3 AT3G45600 |
| arahy.Tifrunner.gnm1.ann1.OZGE19.1 | A.hypogaea v1.0      | 2.14E-118 | 69 | 285 | AtTET3 AT3G45600 |
| Phvul.005G137500.1.p               | P.vulgaris v2.1      | 8.92E-108 | 62 | 281 | AtTET3 AT3G45600 |
| Lcu.2RBY.7g075810.1                | L.culinaris v1       | 2.68E-72  | 49 | 234 | AtTET3 AT3G45600 |
| Medtr4g129670.1                    | M.truncatula Mt4.0v1 | 1.01E-71  | 49 | 235 | AtTET3 AT3G45600 |
| Glyma.17G069300.1.p                | G.max Wm82.a4.v1     | 5.05E-70  | 47 | 236 | AtTET3 AT3G45600 |
| Phvul.003G151800.1.p               | P.vulgaris v2.1      | 6.1E-70   | 49 | 235 | AtTET3 AT3G45600 |
| Glyma.13G091000.1.p                | G.max Wm82.a4.v1     | 8.07E-70  | 48 | 236 | AtTET3 AT3G45600 |
| Glyma.01G095700.1.p                | G.max Wm82.a4.v1     | 3.6E-69   | 47 | 235 | AtTET3 AT3G45600 |
| Lj4g0025241.1                      | L.japonicus Lj1.0v1  | 9.34E-69  | 46 | 235 | AtTET3 AT3G45600 |
| Lcu.2RBY.5g015480.1                | L.culinaris v1       | 1.68E-67  | 46 | 235 | AtTET3 AT3G45600 |
| arahy.Tifrunner.gnm1.ann1.9I36N1.1 | A.hypogaea v1.0      | 3.22E-67  | 47 | 234 | AtTET3 AT3G45600 |

|                                    |                      |          |    |     |                  |
|------------------------------------|----------------------|----------|----|-----|------------------|
| arahy.Tifrunner.gnm1.ann1.V2Z0GB.1 | A.hypogaea v1.0      | 3.22E-67 | 47 | 234 | AtTET3 AT3G45600 |
| Lj5g0000955.1                      | L.japonicus Lj1.0v1  | 1E-66    | 45 | 279 | AtTET3 AT3G45600 |
| Lj2g0015394.1                      | L.japonicus Lj1.0v1  | 1.07E-66 | 46 | 235 | AtTET3 AT3G45600 |
| Lcu.2RBY.7g030120.1                | L.culinaris v1       | 3.27E-66 | 45 | 235 | AtTET3 AT3G45600 |
| Phvul.007G093400.1.p               | P.vulgaris v2.1      | 3.81E-66 | 46 | 279 | AtTET3 AT3G45600 |
| Ca_11504                           | C.arietinum v1.0     | 4.7E-65  | 45 | 235 | AtTET3 AT3G45600 |
| Phvul.003G284700.1.p               | P.vulgaris v2.1      | 9.39E-65 | 44 | 235 | AtTET3 AT3G45600 |
| Lj4g0026647.1                      | L.japonicus Lj1.0v1  | 1.33E-64 | 45 | 235 | AtTET3 AT3G45600 |
| Glyma.09G205400.1.p                | G.max Wm82.a4.v1     | 1.53E-64 | 45 | 235 | AtTET3 AT3G45600 |
| Glyma.20G178700.1.p                | G.max Wm82.a4.v1     | 3.71E-64 | 44 | 279 | AtTET3 AT3G45600 |
| Glyma.10G212400.1.p                | G.max Wm82.a4.v1     | 3.87E-64 | 45 | 279 | AtTET3 AT3G45600 |
| Medtr6g033335.1                    | M.truncatula Mt4.0v1 | 5.08E-64 | 44 | 279 | AtTET3 AT3G45600 |
| Lj2g0026181.1                      | L.japonicus Lj1.0v1  | 8.13E-64 | 44 | 279 | AtTET3 AT3G45600 |
| Phvul.009G207500.1.p               | P.vulgaris v2.1      | 9.2E-64  | 47 | 235 | AtTET3 AT3G45600 |
| Lcu.2RBY.1g046720.1                | L.culinaris v1       | 2.29E-63 | 44 | 279 | AtTET3 AT3G45600 |
| Glyma.04G147100.1.p                | G.max Wm82.a4.v1     | 4.32E-63 | 48 | 234 | AtTET3 AT3G45600 |
| Phvul.002G140500.1.p               | P.vulgaris v2.1      | 5.45E-63 | 43 | 235 | AtTET3 AT3G45600 |
| Ca_08501                           | C.arietinum v1.0     | 7.59E-63 | 44 | 279 | AtTET3 AT3G45600 |
| arahy.Tifrunner.gnm1.ann1.Z4U2NE.1 | A.hypogaea v1.0      | 1.38E-62 | 44 | 279 | AtTET3 AT3G45600 |
| Glyma.16G145400.1.p                | G.max Wm82.a4.v1     | 3.72E-62 | 43 | 279 | AtTET3 AT3G45600 |
| Lj6g0020177.1                      | L.japonicus Lj1.0v1  | 4.84E-62 | 48 | 235 | AtTET3 AT3G45600 |
| Glyma.02G063700.1.p                | G.max Wm82.a4.v1     | 5.04E-62 | 45 | 279 | AtTET3 AT3G45600 |
| arahy.Tifrunner.gnm1.ann1.Z77BB1.1 | A.hypogaea v1.0      | 5.11E-62 | 44 | 279 | AtTET3 AT3G45600 |
| Medtr1g095530.1                    | M.truncatula Mt4.0v1 | 7.36E-62 | 46 | 279 | AtTET3 AT3G45600 |
| Phvul.004G071900.1.p               | P.vulgaris v2.1      | 5.2E-61  | 41 | 279 | AtTET3 AT3G45600 |
| Medtr8g066790.1                    | M.truncatula Mt4.0v1 | 3.33E-60 | 45 | 235 | AtTET3 AT3G45600 |
| Ca_05887                           | C.arietinum v1.0     | 3.84E-60 | 44 | 235 | AtTET3 AT3G45600 |
| Lcu.2RBY.2g046220.1                | L.culinaris v1       | 4.31E-60 | 42 | 279 | AtTET3 AT3G45600 |
| arahy.Tifrunner.gnm1.ann1.N28W6S.1 | A.hypogaea v1.0      | 5.12E-59 | 43 | 233 | AtTET3 AT3G45600 |
| arahy.Tifrunner.gnm1.ann1.EM0Y56.1 | A.hypogaea v1.0      | 6.29E-59 | 43 | 233 | AtTET3 AT3G45600 |
| arahy.Tifrunner.gnm1.ann1.PNW690.1 | A.hypogaea v1.0      | 2.95E-58 | 41 | 235 | AtTET3 AT3G45600 |
| Medtr8g101600.1                    | M.truncatula Mt4.0v1 | 4.13E-58 | 43 | 235 | AtTET3 AT3G45600 |
| Lcu.2RBY.4g078330.1                | L.culinaris v1       | 7.33E-58 | 43 | 235 | AtTET3 AT3G45600 |
| arahy.Tifrunner.gnm1.ann1.B859HK.1 | A.hypogaea v1.0      | 8.99E-57 | 40 | 235 | AtTET3 AT3G45600 |
| Medtr5g030070.1                    | M.truncatula Mt4.0v1 | 5.04E-56 | 46 | 235 | AtTET3 AT3G45600 |
| arahy.Tifrunner.gnm1.ann1.8QTZ72.1 | A.hypogaea v1.0      | 1.18E-53 | 42 | 236 | AtTET3 AT3G45600 |
| arahy.Tifrunner.gnm1.ann1.4R894K.1 | A.hypogaea v1.0      | 2.5E-53  | 42 | 276 | AtTET3 AT3G45600 |

|                                    |                      |          |    |     |                  |
|------------------------------------|----------------------|----------|----|-----|------------------|
| Phvul.002G304100.1.p               | P.vulgaris v2.1      | 2.57E-53 | 43 | 235 | AtTET3 AT3G45600 |
| Lj4g0027264.1                      | L.japonicus Lj1.0v1  | 9.66E-53 | 43 | 235 | AtTET3 AT3G45600 |
| arahy.Tifrunner.gnm1.ann1.A2QH6A.1 | A.hypogaea v1.0      | 2.61E-52 | 42 | 238 | AtTET3 AT3G45600 |
| Ca_03295                           | C.arietinum v1.0     | 1.86E-51 | 45 | 211 | AtTET3 AT3G45600 |
| Lj2g0020248.1                      | L.japonicus Lj1.0v1  | 2.66E-51 | 38 | 231 | AtTET3 AT3G45600 |
| arahy.Tifrunner.gnm1.ann1.D9WPRA.1 | A.hypogaea v1.0      | 4.32E-51 | 41 | 279 | AtTET3 AT3G45600 |
| Glyma.08G029100.1.p                | G.max Wm82.a4.v1     | 9.78E-51 | 43 | 235 | AtTET3 AT3G45600 |
| Lcu.2RBY.4g075230.1                | L.culinaris v1       | 7.46E-50 | 35 | 234 | AtTET3 AT3G45600 |
| Medtr8g097280.1                    | M.truncatula Mt4.0v1 | 2.37E-49 | 34 | 234 | AtTET3 AT3G45600 |
| Phvul.004G171300.1.p               | P.vulgaris v2.1      | 4.95E-49 | 39 | 236 | AtTET3 AT3G45600 |
| arahy.Tifrunner.gnm1.ann1.QC8A1V.1 | A.hypogaea v1.0      | 3.78E-48 | 39 | 235 | AtTET3 AT3G45600 |
| arahy.Tifrunner.gnm1.ann1.EEBB9D.1 | A.hypogaea v1.0      | 3.78E-48 | 39 | 235 | AtTET3 AT3G45600 |
| Glyma.07G129100.1.p                | G.max Wm82.a4.v1     | 5.23E-47 | 39 | 240 | AtTET3 AT3G45600 |
| Phvul.002G287500.1.p               | P.vulgaris v2.1      | 1.45E-46 | 34 | 234 | AtTET3 AT3G45600 |
| Glyma.08G012500.2.p                | G.max Wm82.a4.v1     | 1.25E-45 | 33 | 234 | AtTET3 AT3G45600 |
| Glyma.05G205600.1.p                | G.max Wm82.a4.v1     | 1.31E-45 | 33 | 234 | AtTET3 AT3G45600 |
| arahy.Tifrunner.gnm1.ann1.XJXR2L.1 | A.hypogaea v1.0      | 1.79E-45 | 34 | 232 | AtTET3 AT3G45600 |
| arahy.Tifrunner.gnm1.ann1.2A0H1U.1 | A.hypogaea v1.0      | 6.85E-45 | 34 | 232 | AtTET3 AT3G45600 |
| Lcu.2RBY.7g063730.1                | L.culinaris v1       | 2.74E-44 | 36 | 235 | AtTET3 AT3G45600 |
| Glyma.17G084000.1.p                | G.max Wm82.a4.v1     | 2.92E-44 | 36 | 237 | AtTET3 AT3G45600 |
| Lj4g0018138.1                      | L.japonicus Lj1.0v1  | 6.26E-44 | 37 | 235 | AtTET3 AT3G45600 |
| arahy.Tifrunner.gnm1.ann1.Z53AND.1 | A.hypogaea v1.0      | 6.85E-44 | 38 | 202 | AtTET3 AT3G45600 |
| Glyma.17G069300.2.p                | G.max Wm82.a4.v1     | 8.72E-44 | 48 | 171 | AtTET3 AT3G45600 |
| arahy.Tifrunner.gnm1.ann1.T23S8A.1 | A.hypogaea v1.0      | 2.55E-43 | 37 | 203 | AtTET3 AT3G45600 |
| Medtr4g112570.1                    | M.truncatula Mt4.0v1 | 1.45E-41 | 34 | 235 | AtTET3 AT3G45600 |
| Lj4g0013226.1                      | L.japonicus Lj1.0v1  | 1.03E-40 | 34 | 232 | AtTET3 AT3G45600 |
| Phvul.003G180300.1.p               | P.vulgaris v2.1      | 1.25E-39 | 35 | 236 | AtTET3 AT3G45600 |
| Glyma.05G016200.1.p                | G.max Wm82.a4.v1     | 1.9E-39  | 35 | 237 | AtTET3 AT3G45600 |
| Ca_06587                           | C.arietinum v1.0     | 2.81E-39 | 34 | 236 | AtTET3 AT3G45600 |
| Lj1g0003076.1                      | L.japonicus Lj1.0v1  | 1.89E-36 | 32 | 238 | AtTET3 AT3G45600 |
| Glyma.04G144500.1.p                | G.max Wm82.a4.v1     | 5.57E-35 | 34 | 236 | AtTET3 AT3G45600 |
| Glyma.15G207300.1.p                | G.max Wm82.a4.v1     | 8.5E-35  | 34 | 236 | AtTET3 AT3G45600 |
| Medtr2g056130.1                    | M.truncatula Mt4.0v1 | 1.56E-34 | 35 | 235 | AtTET3 AT3G45600 |
| Lcu.2RBY.2g064540.1                | L.culinaris v1       | 3.08E-34 | 35 | 237 | AtTET3 AT3G45600 |
| Ca_05724                           | C.arietinum v1.0     | 9.75E-33 | 29 | 234 | AtTET3 AT3G45600 |
| Phvul.009G191200.1.p               | P.vulgaris v2.1      | 3.53E-31 | 31 | 236 | AtTET3 AT3G45600 |
| Ca_25832                           | C.arietinum v1.0     | 1.96E-28 | 34 | 236 | AtTET3 AT3G45600 |



|                                    |                      |           |    |     |                  |
|------------------------------------|----------------------|-----------|----|-----|------------------|
| arahy.Tifrunner.gnm1.ann1.H32RIC.1 | A.hypogaea v1.0      | 4.56E-28  | 31 | 241 | AtTET3 AT3G45600 |
| Ca_23646                           | C.arietinum v1.0     | 7.06E-27  | 39 | 171 | AtTET3 AT3G45600 |
| Phvul.011G072100.1.p               | P.vulgaris v2.1      | 4.08E-131 | 73 | 277 | AtTET4 AT5G60220 |
| Glyma.11G152124.1.p                | G.max Wm82.a4.v1     | 1.31E-129 | 73 | 277 | AtTET4 AT5G60220 |
| Glyma.12G072100.1.p                | G.max Wm82.a4.v1     | 1.85E-129 | 73 | 277 | AtTET4 AT5G60220 |
| Medtr4g061010.1                    | M.truncatula Mt4.0v1 | 9.35E-129 | 73 | 276 | AtTET4 AT5G60220 |
| arahy.Tifrunner.gnm1.ann1.AUDB51.1 | A.hypogaea v1.0      | 1.02E-127 | 71 | 277 | AtTET4 AT5G60220 |
| Ca_14606                           | C.arietinum v1.0     | 1.32E-126 | 72 | 276 | AtTET4 AT5G60220 |
| arahy.Tifrunner.gnm1.ann1.JZ8XUN.1 | A.hypogaea v1.0      | 1.54E-126 | 71 | 277 | AtTET4 AT5G60220 |
| Lj3g0001285.1                      | L.japonicus Lj1.0v1  | 5.31E-126 | 73 | 278 | AtTET4 AT5G60220 |
| arahy.Tifrunner.gnm1.ann1.LZE6LN.1 | A.hypogaea v1.0      | 1.45E-125 | 71 | 277 | AtTET4 AT5G60220 |
| Lcu.2RBY.4g032690.1                | L.culinaris v1       | 9.57E-122 | 69 | 276 | AtTET4 AT5G60220 |
| Glyma.13G328700.1.p                | G.max Wm82.a4.v1     | 3.86E-120 | 67 | 279 | AtTET4 AT5G60220 |
| arahy.Tifrunner.gnm1.ann1.OZGE19.1 | A.hypogaea v1.0      | 3.46E-109 | 65 | 277 | AtTET4 AT5G60220 |
| Phvul.005G137500.1.p               | P.vulgaris v2.1      | 1.56E-104 | 59 | 278 | AtTET4 AT5G60220 |
| Lcu.2RBY.7g075810.1                | L.culinaris v1       | 1.15E-71  | 47 | 262 | AtTET4 AT5G60220 |
| Glyma.13G091000.1.p                | G.max Wm82.a4.v1     | 1.92E-71  | 48 | 264 | AtTET4 AT5G60220 |
| Glyma.17G069300.1.p                | G.max Wm82.a4.v1     | 1.42E-70  | 47 | 264 | AtTET4 AT5G60220 |
| Phvul.003G151800.1.p               | P.vulgaris v2.1      | 6.27E-70  | 47 | 263 | AtTET4 AT5G60220 |
| Medtr4g129670.1                    | M.truncatula Mt4.0v1 | 9.89E-70  | 47 | 263 | AtTET4 AT5G60220 |
| Lj5g0000955.1                      | L.japonicus Lj1.0v1  | 2.81E-68  | 44 | 277 | AtTET4 AT5G60220 |
| Phvul.007G093400.1.p               | P.vulgaris v2.1      | 4.78E-68  | 44 | 277 | AtTET4 AT5G60220 |
| Lj4g0025241.1                      | L.japonicus Lj1.0v1  | 2.4E-67   | 45 | 259 | AtTET4 AT5G60220 |
| Glyma.10G212400.1.p                | G.max Wm82.a4.v1     | 3.13E-67  | 44 | 277 | AtTET4 AT5G60220 |
| Glyma.20G178700.1.p                | G.max Wm82.a4.v1     | 1.69E-66  | 43 | 277 | AtTET4 AT5G60220 |
| arahy.Tifrunner.gnm1.ann1.9I36N1.1 | A.hypogaea v1.0      | 1.99E-66  | 46 | 264 | AtTET4 AT5G60220 |
| arahy.Tifrunner.gnm1.ann1.V2Z0GB.1 | A.hypogaea v1.0      | 1.99E-66  | 46 | 264 | AtTET4 AT5G60220 |
| Glyma.16G145400.1.p                | G.max Wm82.a4.v1     | 5.67E-66  | 45 | 278 | AtTET4 AT5G60220 |
| Lj2g0026181.1                      | L.japonicus Lj1.0v1  | 1.19E-64  | 45 | 277 | AtTET4 AT5G60220 |
| Glyma.02G063700.1.p                | G.max Wm82.a4.v1     | 2.38E-64  | 44 | 278 | AtTET4 AT5G60220 |
| Medtr6g033335.1                    | M.truncatula Mt4.0v1 | 8.41E-64  | 44 | 277 | AtTET4 AT5G60220 |
| arahy.Tifrunner.gnm1.ann1.Z4U2NE.1 | A.hypogaea v1.0      | 3.94E-63  | 42 | 278 | AtTET4 AT5G60220 |
| arahy.Tifrunner.gnm1.ann1.Z77BB1.1 | A.hypogaea v1.0      | 4.94E-63  | 42 | 278 | AtTET4 AT5G60220 |
| Glyma.04G147100.1.p                | G.max Wm82.a4.v1     | 1.04E-62  | 45 | 262 | AtTET4 AT5G60220 |
| Glyma.01G095700.1.p                | G.max Wm82.a4.v1     | 2.42E-62  | 45 | 263 | AtTET4 AT5G60220 |
| Phvul.004G071900.1.p               | P.vulgaris v2.1      | 2.57E-62  | 43 | 278 | AtTET4 AT5G60220 |
| Lj6g0020177.1                      | L.japonicus Lj1.0v1  | 4.75E-62  | 46 | 260 | AtTET4 AT5G60220 |

|                                    |                      |          |    |     |                  |
|------------------------------------|----------------------|----------|----|-----|------------------|
| Lj2g0015394.1                      | L.japonicus Lj1.0v1  | 5.09E-62 | 42 | 262 | AtTET4 AT5G60220 |
| Ca_08501                           | C.arietinum v1.0     | 7.32E-62 | 43 | 277 | AtTET4 AT5G60220 |
| Medtr8g066790.1                    | M.truncatula Mt4.0v1 | 6.22E-61 | 44 | 262 | AtTET4 AT5G60220 |
| Lcu.2RBY.7g030120.1                | L.culinaris v1       | 9.27E-61 | 44 | 262 | AtTET4 AT5G60220 |
| Phvul.003G284700.1.p               | P.vulgaris v2.1      | 1.7E-59  | 42 | 262 | AtTET4 AT5G60220 |
| Lcu.2RBY.2g046220.1                | L.culinaris v1       | 2.4E-59  | 40 | 277 | AtTET4 AT5G60220 |
| Lj4g0026647.1                      | L.japonicus Lj1.0v1  | 2.72E-58 | 44 | 235 | AtTET4 AT5G60220 |
| Lcu.2RBY.1g046720.1                | L.culinaris v1       | 3.48E-58 | 42 | 277 | AtTET4 AT5G60220 |
| Ca_05887                           | C.arietinum v1.0     | 4E-58    | 44 | 263 | AtTET4 AT5G60220 |
| Lj4g0027264.1                      | L.japonicus Lj1.0v1  | 1.55E-57 | 44 | 263 | AtTET4 AT5G60220 |
| Phvul.009G207500.1.p               | P.vulgaris v2.1      | 4.75E-57 | 44 | 262 | AtTET4 AT5G60220 |
| Lcu.2RBY.5g015480.1                | L.culinaris v1       | 4.81E-57 | 42 | 262 | AtTET4 AT5G60220 |
| Ca_11504                           | C.arietinum v1.0     | 9.48E-57 | 43 | 262 | AtTET4 AT5G60220 |
| Phvul.002G140500.1.p               | P.vulgaris v2.1      | 2.06E-56 | 43 | 262 | AtTET4 AT5G60220 |
| arahy.Tifrunner.gnm1.ann1.B859HK.1 | A.hypogaea v1.0      | 7.18E-56 | 38 | 265 | AtTET4 AT5G60220 |
| Glyma.09G205400.1.p                | G.max Wm82.a4.v1     | 8.06E-56 | 44 | 262 | AtTET4 AT5G60220 |
| Lcu.2RBY.4g078330.1                | L.culinaris v1       | 2.87E-55 | 45 | 262 | AtTET4 AT5G60220 |
| Medtr8g101600.1                    | M.truncatula Mt4.0v1 | 5.02E-55 | 43 | 263 | AtTET4 AT5G60220 |
| Medtr1g095530.1                    | M.truncatula Mt4.0v1 | 5.15E-55 | 44 | 277 | AtTET4 AT5G60220 |
| arahy.Tifrunner.gnm1.ann1.4R894K.1 | A.hypogaea v1.0      | 1.85E-54 | 40 | 280 | AtTET4 AT5G60220 |
| Ca_03295                           | C.arietinum v1.0     | 1.99E-54 | 46 | 239 | AtTET4 AT5G60220 |
| Phvul.002G304100.1.p               | P.vulgaris v2.1      | 2.33E-54 | 43 | 262 | AtTET4 AT5G60220 |
| arahy.Tifrunner.gnm1.ann1.8QTZ72.1 | A.hypogaea v1.0      | 3.55E-54 | 40 | 242 | AtTET4 AT5G60220 |
| arahy.Tifrunner.gnm1.ann1.PNW690.1 | A.hypogaea v1.0      | 3.7E-54  | 39 | 235 | AtTET4 AT5G60220 |
| arahy.Tifrunner.gnm1.ann1.N28W6S.1 | A.hypogaea v1.0      | 5.04E-54 | 43 | 259 | AtTET4 AT5G60220 |
| arahy.Tifrunner.gnm1.ann1.EM0Y56.1 | A.hypogaea v1.0      | 5.55E-54 | 43 | 259 | AtTET4 AT5G60220 |
| Medtr5g030070.1                    | M.truncatula Mt4.0v1 | 5.72E-53 | 44 | 262 | AtTET4 AT5G60220 |
| Glyma.08G029100.1.p                | G.max Wm82.a4.v1     | 1.37E-51 | 44 | 263 | AtTET4 AT5G60220 |
| arahy.Tifrunner.gnm1.ann1.D9WPRA.1 | A.hypogaea v1.0      | 1.41E-50 | 39 | 277 | AtTET4 AT5G60220 |
| Phvul.004G171300.1.p               | P.vulgaris v2.1      | 1.25E-49 | 39 | 263 | AtTET4 AT5G60220 |
| arahy.Tifrunner.gnm1.ann1.A2QH6A.1 | A.hypogaea v1.0      | 1.35E-48 | 40 | 235 | AtTET4 AT5G60220 |
| Lcu.2RBY.4g075230.1                | L.culinaris v1       | 5.21E-47 | 35 | 224 | AtTET4 AT5G60220 |
| Phvul.002G287500.1.p               | P.vulgaris v2.1      | 1.48E-46 | 36 | 257 | AtTET4 AT5G60220 |
| Glyma.07G129100.1.p                | G.max Wm82.a4.v1     | 1.63E-46 | 39 | 262 | AtTET4 AT5G60220 |
| Medtr8g097280.1                    | M.truncatula Mt4.0v1 | 2.46E-46 | 35 | 224 | AtTET4 AT5G60220 |
| Lj2g0020248.1                      | L.japonicus Lj1.0v1  | 1.12E-45 | 40 | 233 | AtTET4 AT5G60220 |
| Glyma.08G012500.2.p                | G.max Wm82.a4.v1     | 2.12E-45 | 35 | 257 | AtTET4 AT5G60220 |

|                                    |                      |           |    |     |                  |
|------------------------------------|----------------------|-----------|----|-----|------------------|
| Glyma.05G205600.1.p                | G.max Wm82.a4.v1     | 5.02E-45  | 35 | 257 | AtTET4 AT5G60220 |
| arahy.Tifrunner.gnm1.ann1.T23S8A.1 | A.hypogaea v1.0      | 1.1E-44   | 38 | 237 | AtTET4 AT5G60220 |
| arahy.Tifrunner.gnm1.ann1.QC8A1V.1 | A.hypogaea v1.0      | 1.78E-44  | 38 | 235 | AtTET4 AT5G60220 |
| arahy.Tifrunner.gnm1.ann1.EEBB9D.1 | A.hypogaea v1.0      | 1.78E-44  | 38 | 235 | AtTET4 AT5G60220 |
| arahy.Tifrunner.gnm1.ann1.Z53AND.1 | A.hypogaea v1.0      | 2.65E-44  | 38 | 237 | AtTET4 AT5G60220 |
| Glyma.17G084000.1.p                | G.max Wm82.a4.v1     | 2.89E-44  | 36 | 236 | AtTET4 AT5G60220 |
| Glyma.05G016200.1.p                | G.max Wm82.a4.v1     | 3.21E-44  | 36 | 236 | AtTET4 AT5G60220 |
| Phvul.003G180300.1.p               | P.vulgaris v2.1      | 3.96E-44  | 35 | 235 | AtTET4 AT5G60220 |
| arahy.Tifrunner.gnm1.ann1.XJXR2L.1 | A.hypogaea v1.0      | 2.96E-43  | 35 | 228 | AtTET4 AT5G60220 |
| Lcu.2RBY.7g063730.1                | L.culinaris v1       | 3.2E-43   | 37 | 201 | AtTET4 AT5G60220 |
| arahy.Tifrunner.gnm1.ann1.2A0H1U.1 | A.hypogaea v1.0      | 3.94E-43  | 35 | 228 | AtTET4 AT5G60220 |
| Medtr4g112570.1                    | M.truncatula Mt4.0v1 | 5.19E-42  | 37 | 201 | AtTET4 AT5G60220 |
| Glyma.17G069300.2.p                | G.max Wm82.a4.v1     | 1.01E-41  | 46 | 171 | AtTET4 AT5G60220 |
| Lj4g0018138.1                      | L.japonicus Lj1.0v1  | 1.84E-41  | 37 | 201 | AtTET4 AT5G60220 |
| Ca_06587                           | C.arietinum v1.0     | 1.47E-39  | 34 | 235 | AtTET4 AT5G60220 |
| Lj4g0013226.1                      | L.japonicus Lj1.0v1  | 1.16E-38  | 34 | 257 | AtTET4 AT5G60220 |
| Medtr2g056130.1                    | M.truncatula Mt4.0v1 | 7.61E-38  | 36 | 231 | AtTET4 AT5G60220 |
| Glyma.04G144500.1.p                | G.max Wm82.a4.v1     | 7.91E-36  | 34 | 267 | AtTET4 AT5G60220 |
| Glyma.15G207300.1.p                | G.max Wm82.a4.v1     | 2.1E-35   | 34 | 267 | AtTET4 AT5G60220 |
| Lcu.2RBY.2g064540.1                | L.culinaris v1       | 2.2E-35   | 33 | 240 | AtTET4 AT5G60220 |
| Ca_25832                           | C.arietinum v1.0     | 3.17E-32  | 35 | 203 | AtTET4 AT5G60220 |
| Lj1g0003076.1                      | L.japonicus Lj1.0v1  | 4.22E-32  | 33 | 238 | AtTET4 AT5G60220 |
| Phvul.009G191200.1.p               | P.vulgaris v2.1      | 6.02E-32  | 31 | 235 | AtTET4 AT5G60220 |
| Ca_23646                           | C.arietinum v1.0     | 9.7E-29   | 40 | 169 | AtTET4 AT5G60220 |
| Ca_05724                           | C.arietinum v1.0     | 1.75E-27  | 29 | 253 | AtTET4 AT5G60220 |
| arahy.Tifrunner.gnm1.ann1.H32RIC.1 | A.hypogaea v1.0      | 2.56E-26  | 30 | 265 | AtTET4 AT5G60220 |
| Lj5g0000955.1                      | L.japonicus Lj1.0v1  | 2.21E-119 | 59 | 279 | AtTET5 AT4G23410 |
| Glyma.10G212400.1.p                | G.max Wm82.a4.v1     | 3.41E-117 | 59 | 279 | AtTET5 AT4G23410 |
| Ca_08501                           | C.arietinum v1.0     | 2.75E-116 | 59 | 281 | AtTET5 AT4G23410 |
| Phvul.007G093400.1.p               | P.vulgaris v2.1      | 1.07E-115 | 58 | 281 | AtTET5 AT4G23410 |
| Glyma.20G178700.1.p                | G.max Wm82.a4.v1     | 1.47E-114 | 58 | 279 | AtTET5 AT4G23410 |
| Glyma.16G145400.1.p                | G.max Wm82.a4.v1     | 5.34E-114 | 58 | 281 | AtTET5 AT4G23410 |
| Phvul.004G071900.1.p               | P.vulgaris v2.1      | 6.22E-114 | 58 | 281 | AtTET5 AT4G23410 |
| Glyma.02G063700.1.p                | G.max Wm82.a4.v1     | 1.47E-113 | 58 | 281 | AtTET5 AT4G23410 |
| Lj2g0026181.1                      | L.japonicus Lj1.0v1  | 6.61E-111 | 59 | 280 | AtTET5 AT4G23410 |
| Lcu.2RBY.1g046720.1                | L.culinaris v1       | 1.93E-110 | 59 | 281 | AtTET5 AT4G23410 |
| Medtr6g033335.1                    | M.truncatula Mt4.0v1 | 1.02E-109 | 56 | 281 | AtTET5 AT4G23410 |

|                                    |                      |           |    |     |                  |
|------------------------------------|----------------------|-----------|----|-----|------------------|
| arahy.Tifrunner.gnm1.ann1.Z4U2NE.1 | A.hypogaea v1.0      | 1.35E-106 | 57 | 275 | AtTET5 AT4G23410 |
| arahy.Tifrunner.gnm1.ann1.Z77BB1.1 | A.hypogaea v1.0      | 2E-106    | 57 | 275 | AtTET5 AT4G23410 |
| Lcu.2RBY.2g046220.1                | L.culinaris v1       | 4.17E-106 | 55 | 280 | AtTET5 AT4G23410 |
| Medtr1g095530.1                    | M.truncatula Mt4.0v1 | 1.94E-100 | 58 | 281 | AtTET5 AT4G23410 |
| arahy.Tifrunner.gnm1.ann1.D9WPRA.1 | A.hypogaea v1.0      | 1.03E-93  | 54 | 268 | AtTET5 AT4G23410 |
| arahy.Tifrunner.gnm1.ann1.4R894K.1 | A.hypogaea v1.0      | 2.18E-92  | 55 | 262 | AtTET5 AT4G23410 |
| Glyma.13G091000.1.p                | G.max Wm82.a4.v1     | 4E-68     | 42 | 269 | AtTET5 AT4G23410 |
| Ca_23646                           | C.arietinum v1.0     | 1.92E-67  | 54 | 169 | AtTET5 AT4G23410 |
| Lcu.2RBY.7g075810.1                | L.culinaris v1       | 1.92E-66  | 42 | 263 | AtTET5 AT4G23410 |
| Phvul.003G151800.1.p               | P.vulgaris v2.1      | 2.56E-65  | 41 | 263 | AtTET5 AT4G23410 |
| Glyma.17G069300.1.p                | G.max Wm82.a4.v1     | 6.56E-64  | 41 | 269 | AtTET5 AT4G23410 |
| arahy.Tifrunner.gnm1.ann1.LZE6LN.1 | A.hypogaea v1.0      | 6.4E-63   | 41 | 276 | AtTET5 AT4G23410 |
| arahy.Tifrunner.gnm1.ann1.9I36N1.1 | A.hypogaea v1.0      | 3.52E-62  | 43 | 261 | AtTET5 AT4G23410 |
| arahy.Tifrunner.gnm1.ann1.V2Z0GB.1 | A.hypogaea v1.0      | 3.52E-62  | 43 | 261 | AtTET5 AT4G23410 |
| Lj4g0025241.1                      | L.japonicus Lj1.0v1  | 9.26E-61  | 42 | 264 | AtTET5 AT4G23410 |
| Glyma.04G147100.1.p                | G.max Wm82.a4.v1     | 2.53E-60  | 42 | 259 | AtTET5 AT4G23410 |
| Lj6g0020177.1                      | L.japonicus Lj1.0v1  | 5.4E-60   | 42 | 263 | AtTET5 AT4G23410 |
| Phvul.011G072100.1.p               | P.vulgaris v2.1      | 1.1E-58   | 39 | 280 | AtTET5 AT4G23410 |
| Medtr4g129670.1                    | M.truncatula Mt4.0v1 | 4.79E-57  | 42 | 259 | AtTET5 AT4G23410 |
| Phvul.009G207500.1.p               | P.vulgaris v2.1      | 2E-54     | 42 | 264 | AtTET5 AT4G23410 |
| arahy.Tifrunner.gnm1.ann1.0ZGE19.1 | A.hypogaea v1.0      | 5.27E-54  | 38 | 274 | AtTET5 AT4G23410 |
| Glyma.13G328700.1.p                | G.max Wm82.a4.v1     | 1.16E-52  | 38 | 282 | AtTET5 AT4G23410 |
| Medtr4g061010.1                    | M.truncatula Mt4.0v1 | 1.25E-51  | 41 | 280 | AtTET5 AT4G23410 |
| Lj2g0015394.1                      | L.japonicus Lj1.0v1  | 1.56E-51  | 37 | 259 | AtTET5 AT4G23410 |
| Ca_14606                           | C.arietinum v1.0     | 2.18E-50  | 39 | 280 | AtTET5 AT4G23410 |
| Glyma.11G152124.1.p                | G.max Wm82.a4.v1     | 4.99E-50  | 39 | 280 | AtTET5 AT4G23410 |
| arahy.Tifrunner.gnm1.ann1.JZ8XUN.1 | A.hypogaea v1.0      | 5.99E-50  | 39 | 280 | AtTET5 AT4G23410 |
| arahy.Tifrunner.gnm1.ann1.AUDB51.1 | A.hypogaea v1.0      | 7.03E-50  | 39 | 280 | AtTET5 AT4G23410 |
| arahy.Tifrunner.gnm1.ann1.N28W6S.1 | A.hypogaea v1.0      | 1.01E-49  | 40 | 257 | AtTET5 AT4G23410 |
| arahy.Tifrunner.gnm1.ann1.EM0Y56.1 | A.hypogaea v1.0      | 1.36E-49  | 40 | 257 | AtTET5 AT4G23410 |
| Medtr8g066790.1                    | M.truncatula Mt4.0v1 | 4.93E-49  | 37 | 259 | AtTET5 AT4G23410 |
| arahy.Tifrunner.gnm1.ann1.8QTZ72.1 | A.hypogaea v1.0      | 5.07E-49  | 37 | 261 | AtTET5 AT4G23410 |
| Ca_03295                           | C.arietinum v1.0     | 1.57E-48  | 43 | 236 | AtTET5 AT4G23410 |
| Lcu.2RBY.4g032690.1                | L.culinaris v1       | 2.05E-48  | 40 | 280 | AtTET5 AT4G23410 |
| Glyma.12G072100.1.p                | G.max Wm82.a4.v1     | 2.23E-48  | 39 | 280 | AtTET5 AT4G23410 |
| Lj4g0027264.1                      | L.japonicus Lj1.0v1  | 2.26E-48  | 40 | 254 | AtTET5 AT4G23410 |
| Phvul.005G137500.1.p               | P.vulgaris v2.1      | 2.85E-48  | 37 | 280 | AtTET5 AT4G23410 |

|                                    |                      |          |    |     |                  |
|------------------------------------|----------------------|----------|----|-----|------------------|
| Lj3g0001285.1                      | L.japonicus Lj1.0v1  | 6.21E-48 | 39 | 286 | AtTET5 AT4G23410 |
| Phvul.002G304100.1.p               | P.vulgaris v2.1      | 7.15E-48 | 42 | 254 | AtTET5 AT4G23410 |
| Glyma.17G084000.1.p                | G.max Wm82.a4.v1     | 2.08E-47 | 35 | 265 | AtTET5 AT4G23410 |
| Glyma.05G016200.1.p                | G.max Wm82.a4.v1     | 2.13E-47 | 35 | 265 | AtTET5 AT4G23410 |
| Lcu.2RBY.7g030120.1                | L.culinaris v1       | 3.26E-46 | 37 | 266 | AtTET5 AT4G23410 |
| arahy.Tifrunner.gnm1.ann1.A2QH6A.1 | A.hypogaea v1.0      | 1.14E-45 | 38 | 258 | AtTET5 AT4G23410 |
| Phvul.002G287500.1.p               | P.vulgaris v2.1      | 3.35E-45 | 34 | 254 | AtTET5 AT4G23410 |
| Glyma.05G205600.1.p                | G.max Wm82.a4.v1     | 1.77E-44 | 33 | 256 | AtTET5 AT4G23410 |
| Phvul.003G284700.1.p               | P.vulgaris v2.1      | 2.47E-44 | 36 | 260 | AtTET5 AT4G23410 |
| arahy.Tifrunner.gnm1.ann1.XJXR2L.1 | A.hypogaea v1.0      | 3E-44    | 33 | 257 | AtTET5 AT4G23410 |
| Medtr8g101600.1                    | M.truncatula Mt4.0v1 | 2.9E-43  | 36 | 254 | AtTET5 AT4G23410 |
| arahy.Tifrunner.gnm1.ann1.B859HK.1 | A.hypogaea v1.0      | 2.93E-43 | 36 | 256 | AtTET5 AT4G23410 |
| Glyma.01G095700.1.p                | G.max Wm82.a4.v1     | 3.63E-43 | 36 | 259 | AtTET5 AT4G23410 |
| Glyma.08G029100.1.p                | G.max Wm82.a4.v1     | 3.83E-43 | 38 | 254 | AtTET5 AT4G23410 |
| Ca_05887                           | C.arietinum v1.0     | 6.19E-43 | 39 | 254 | AtTET5 AT4G23410 |
| Phvul.003G180300.1.p               | P.vulgaris v2.1      | 8.98E-43 | 35 | 260 | AtTET5 AT4G23410 |
| Glyma.09G205400.1.p                | G.max Wm82.a4.v1     | 1.69E-42 | 39 | 254 | AtTET5 AT4G23410 |
| arahy.Tifrunner.gnm1.ann1.2A0H1U.1 | A.hypogaea v1.0      | 2.39E-42 | 33 | 257 | AtTET5 AT4G23410 |
| Lcu.2RBY.4g075230.1                | L.culinaris v1       | 9.74E-42 | 33 | 256 | AtTET5 AT4G23410 |
| Glyma.08G012500.2.p                | G.max Wm82.a4.v1     | 1.33E-41 | 32 | 256 | AtTET5 AT4G23410 |
| Lcu.2RBY.4g078330.1                | L.culinaris v1       | 3.03E-41 | 37 | 254 | AtTET5 AT4G23410 |
| arahy.Tifrunner.gnm1.ann1.T23S8A.1 | A.hypogaea v1.0      | 3.28E-41 | 34 | 264 | AtTET5 AT4G23410 |
| Phvul.004G171300.1.p               | P.vulgaris v2.1      | 1.28E-40 | 39 | 258 | AtTET5 AT4G23410 |
| Medtr5g030070.1                    | M.truncatula Mt4.0v1 | 2.53E-40 | 38 | 254 | AtTET5 AT4G23410 |
| arahy.Tifrunner.gnm1.ann1.Z53AND.1 | A.hypogaea v1.0      | 5.46E-40 | 33 | 264 | AtTET5 AT4G23410 |
| Ca_11504                           | C.arietinum v1.0     | 1.36E-39 | 39 | 254 | AtTET5 AT4G23410 |
| Medtr2g056130.1                    | M.truncatula Mt4.0v1 | 3.05E-39 | 34 | 267 | AtTET5 AT4G23410 |
| arahy.Tifrunner.gnm1.ann1.PNW690.1 | A.hypogaea v1.0      | 5.27E-39 | 36 | 227 | AtTET5 AT4G23410 |
| Lcu.2RBY.5g015480.1                | L.culinaris v1       | 5.67E-39 | 37 | 254 | AtTET5 AT4G23410 |
| Lj4g0013226.1                      | L.japonicus Lj1.0v1  | 1.58E-38 | 32 | 259 | AtTET5 AT4G23410 |
| Lj4g0026647.1                      | L.japonicus Lj1.0v1  | 2.19E-38 | 36 | 259 | AtTET5 AT4G23410 |
| Medtr8g097280.1                    | M.truncatula Mt4.0v1 | 3.78E-38 | 33 | 249 | AtTET5 AT4G23410 |
| Glyma.07G129100.1.p                | G.max Wm82.a4.v1     | 1.75E-36 | 38 | 258 | AtTET5 AT4G23410 |
| Lcu.2RBY.7g063730.1                | L.culinaris v1       | 3.58E-36 | 33 | 266 | AtTET5 AT4G23410 |
| Phvul.002G140500.1.p               | P.vulgaris v2.1      | 3.79E-36 | 36 | 253 | AtTET5 AT4G23410 |
| Lcu.2RBY.2g064540.1                | L.culinaris v1       | 4.1E-36  | 33 | 261 | AtTET5 AT4G23410 |
| Ca_06587                           | C.arietinum v1.0     | 7.23E-36 | 32 | 258 | AtTET5 AT4G23410 |

|                                    |                      |           |    |     |                  |
|------------------------------------|----------------------|-----------|----|-----|------------------|
| Medtr4g112570.1                    | M.truncatula Mt4.0v1 | 1.41E-35  | 32 | 266 | AtTET5 AT4G23410 |
| Lj4g0018138.1                      | L.japonicus Lj1.0v1  | 1.27E-34  | 32 | 267 | AtTET5 AT4G23410 |
| Ca_25832                           | C.arietinum v1.0     | 3.24E-34  | 33 | 274 | AtTET5 AT4G23410 |
| Phvul.009G191200.1.p               | P.vulgaris v2.1      | 1.32E-33  | 33 | 260 | AtTET5 AT4G23410 |
| Glyma.04G144500.1.p                | G.max Wm82.a4.v1     | 3.15E-33  | 33 | 258 | AtTET5 AT4G23410 |
| Glyma.15G207300.1.p                | G.max Wm82.a4.v1     | 6.86E-33  | 33 | 258 | AtTET5 AT4G23410 |
| arahy.Tifrunner.gnm1.ann1.H32RIC.1 | A.hypogaea v1.0      | 9.01E-33  | 34 | 177 | AtTET5 AT4G23410 |
| Lj1g0003076.1                      | L.japonicus Lj1.0v1  | 1.13E-32  | 34 | 279 | AtTET5 AT4G23410 |
| Ca_05724                           | C.arietinum v1.0     | 7.49E-32  | 26 | 259 | AtTET5 AT4G23410 |
| Lj2g0020248.1                      | L.japonicus Lj1.0v1  | 5.05E-31  | 37 | 224 | AtTET5 AT4G23410 |
| Glyma.17G069300.2.p                | G.max Wm82.a4.v1     | 1.66E-29  | 43 | 169 | AtTET5 AT4G23410 |
| arahy.Tifrunner.gnm1.ann1.QC8A1V.1 | A.hypogaea v1.0      | 1.84E-28  | 33 | 252 | AtTET5 AT4G23410 |
| arahy.Tifrunner.gnm1.ann1.EEBB9D.1 | A.hypogaea v1.0      | 1.84E-28  | 33 | 252 | AtTET5 AT4G23410 |
| arahy.Tifrunner.gnm1.ann1.8RU08H.1 | A.hypogaea v1.0      | 1.57E-27  | 31 | 175 | AtTET5 AT4G23410 |
| Glyma.10G212400.1.p                | G.max Wm82.a4.v1     | 6.17E-135 | 71 | 284 | AtTET6 AT3G12090 |
| Glyma.20G178700.1.p                | G.max Wm82.a4.v1     | 6.08E-134 | 70 | 284 | AtTET6 AT3G12090 |
| Lj5g0000955.1                      | L.japonicus Lj1.0v1  | 4.51E-133 | 70 | 284 | AtTET6 AT3G12090 |
| Phvul.007G093400.1.p               | P.vulgaris v2.1      | 1.95E-132 | 70 | 284 | AtTET6 AT3G12090 |
| Lj2g0026181.1                      | L.japonicus Lj1.0v1  | 3.91E-127 | 68 | 282 | AtTET6 AT3G12090 |
| Ca_08501                           | C.arietinum v1.0     | 4.73E-127 | 68 | 284 | AtTET6 AT3G12090 |
| Phvul.004G071900.1.p               | P.vulgaris v2.1      | 3.1E-126  | 67 | 284 | AtTET6 AT3G12090 |
| Glyma.16G145400.1.p                | G.max Wm82.a4.v1     | 2.51E-125 | 67 | 284 | AtTET6 AT3G12090 |
| Medtr6g033335.1                    | M.truncatula Mt4.0v1 | 2E-124    | 64 | 284 | AtTET6 AT3G12090 |
| Lcu.2RBY.1g046720.1                | L.culinaris v1       | 1.89E-123 | 68 | 284 | AtTET6 AT3G12090 |
| Glyma.02G063700.1.p                | G.max Wm82.a4.v1     | 2.56E-123 | 66 | 284 | AtTET6 AT3G12090 |
| arahy.Tifrunner.gnm1.ann1.Z77BB1.1 | A.hypogaea v1.0      | 4.21E-123 | 65 | 269 | AtTET6 AT3G12090 |
| arahy.Tifrunner.gnm1.ann1.Z4U2NE.1 | A.hypogaea v1.0      | 1.47E-122 | 65 | 269 | AtTET6 AT3G12090 |
| Lcu.2RBY.2g046220.1                | L.culinaris v1       | 4.93E-121 | 63 | 282 | AtTET6 AT3G12090 |
| Medtr1g095530.1                    | M.truncatula Mt4.0v1 | 1.07E-116 | 67 | 284 | AtTET6 AT3G12090 |
| arahy.Tifrunner.gnm1.ann1.4R894K.1 | A.hypogaea v1.0      | 7.49E-111 | 63 | 263 | AtTET6 AT3G12090 |
| arahy.Tifrunner.gnm1.ann1.D9WPRA.1 | A.hypogaea v1.0      | 1.17E-109 | 63 | 264 | AtTET6 AT3G12090 |
| Phvul.003G151800.1.p               | P.vulgaris v2.1      | 2.44E-73  | 46 | 261 | AtTET6 AT3G12090 |
| Lj4g0025241.1                      | L.japonicus Lj1.0v1  | 1.64E-72  | 46 | 261 | AtTET6 AT3G12090 |
| Glyma.13G091000.1.p                | G.max Wm82.a4.v1     | 1.2E-71   | 46 | 261 | AtTET6 AT3G12090 |
| arahy.Tifrunner.gnm1.ann1.9I36N1.1 | A.hypogaea v1.0      | 3.03E-71  | 46 | 261 | AtTET6 AT3G12090 |
| arahy.Tifrunner.gnm1.ann1.V2Z0GB.1 | A.hypogaea v1.0      | 3.03E-71  | 46 | 261 | AtTET6 AT3G12090 |
| arahy.Tifrunner.gnm1.ann1.LZE6LN.1 | A.hypogaea v1.0      | 5.33E-71  | 45 | 276 | AtTET6 AT3G12090 |

|                                    |                      |          |    |     |                  |
|------------------------------------|----------------------|----------|----|-----|------------------|
| Lcu.2RBY.7g075810.1                | L.culinaris v1       | 6.41E-70 | 45 | 261 | AtTET6 AT3G12090 |
| Glyma.17G069300.1.p                | G.max Wm82.a4.v1     | 1.78E-68 | 45 | 262 | AtTET6 AT3G12090 |
| Phvul.011G072100.1.p               | P.vulgaris v2.1      | 9.19E-68 | 44 | 280 | AtTET6 AT3G12090 |
| Medtr4g061010.1                    | M.truncatula Mt4.0v1 | 9.44E-67 | 45 | 280 | AtTET6 AT3G12090 |
| Medtr4g129670.1                    | M.truncatula Mt4.0v1 | 1.47E-66 | 44 | 259 | AtTET6 AT3G12090 |
| Ca_14606                           | C.arietinum v1.0     | 3.5E-66  | 44 | 280 | AtTET6 AT3G12090 |
| Lcu.2RBY.4g032690.1                | L.culinaris v1       | 1.76E-65 | 44 | 280 | AtTET6 AT3G12090 |
| Lj6g0020177.1                      | L.japonicus Lj1.0v1  | 1.02E-64 | 45 | 261 | AtTET6 AT3G12090 |
| arahy.Tifrunner.gnm1.ann1.AUDB51.1 | A.hypogaea v1.0      | 1.69E-64 | 44 | 280 | AtTET6 AT3G12090 |
| arahy.Tifrunner.gnm1.ann1.JZ8XUN.1 | A.hypogaea v1.0      | 2.81E-64 | 44 | 280 | AtTET6 AT3G12090 |
| Glyma.11G152124.1.p                | G.max Wm82.a4.v1     | 6.9E-64  | 43 | 280 | AtTET6 AT3G12090 |
| Glyma.12G072100.1.p                | G.max Wm82.a4.v1     | 8.38E-64 | 43 | 280 | AtTET6 AT3G12090 |
| Lj3g0001285.1                      | L.japonicus Lj1.0v1  | 2.24E-63 | 43 | 281 | AtTET6 AT3G12090 |
| Glyma.04G147100.1.p                | G.max Wm82.a4.v1     | 5.53E-63 | 42 | 264 | AtTET6 AT3G12090 |
| arahy.Tifrunner.gnm1.ann1.OZGE19.1 | A.hypogaea v1.0      | 1.76E-62 | 43 | 274 | AtTET6 AT3G12090 |
| Glyma.13G328700.1.p                | G.max Wm82.a4.v1     | 5.74E-62 | 42 | 283 | AtTET6 AT3G12090 |
| Phvul.009G207500.1.p               | P.vulgaris v2.1      | 1.47E-61 | 43 | 259 | AtTET6 AT3G12090 |
| Lj2g0015394.1                      | L.japonicus Lj1.0v1  | 8.25E-61 | 42 | 253 | AtTET6 AT3G12090 |
| Phvul.005G137500.1.p               | P.vulgaris v2.1      | 4.61E-57 | 40 | 282 | AtTET6 AT3G12090 |
| arahy.Tifrunner.gnm1.ann1.8QTZ72.1 | A.hypogaea v1.0      | 6.86E-57 | 39 | 261 | AtTET6 AT3G12090 |
| Glyma.01G095700.1.p                | G.max Wm82.a4.v1     | 8.95E-56 | 42 | 254 | AtTET6 AT3G12090 |
| Glyma.09G205400.1.p                | G.max Wm82.a4.v1     | 1.88E-55 | 42 | 253 | AtTET6 AT3G12090 |
| Ca_11504                           | C.arietinum v1.0     | 2.04E-54 | 42 | 253 | AtTET6 AT3G12090 |
| Phvul.003G284700.1.p               | P.vulgaris v2.1      | 3.21E-54 | 41 | 254 | AtTET6 AT3G12090 |
| Ca_23646                           | C.arietinum v1.0     | 7.17E-54 | 58 | 173 | AtTET6 AT3G12090 |
| Lj4g0026647.1                      | L.japonicus Lj1.0v1  | 1.32E-53 | 42 | 254 | AtTET6 AT3G12090 |
| Glyma.17G084000.1.p                | G.max Wm82.a4.v1     | 1.81E-53 | 37 | 268 | AtTET6 AT3G12090 |
| arahy.Tifrunner.gnm1.ann1.A2QH6A.1 | A.hypogaea v1.0      | 2.08E-53 | 39 | 259 | AtTET6 AT3G12090 |
| Lcu.2RBY.7g030120.1                | L.culinaris v1       | 2.63E-53 | 41 | 254 | AtTET6 AT3G12090 |
| Medtr8g066790.1                    | M.truncatula Mt4.0v1 | 6.73E-52 | 42 | 254 | AtTET6 AT3G12090 |
| Ca_03295                           | C.arietinum v1.0     | 8.98E-52 | 43 | 230 | AtTET6 AT3G12090 |
| Lcu.2RBY.5g015480.1                | L.culinaris v1       | 2.58E-51 | 40 | 253 | AtTET6 AT3G12090 |
| Ca_05887                           | C.arietinum v1.0     | 6.11E-51 | 41 | 253 | AtTET6 AT3G12090 |
| arahy.Tifrunner.gnm1.ann1.N28W6S.1 | A.hypogaea v1.0      | 6.36E-51 | 41 | 257 | AtTET6 AT3G12090 |
| arahy.Tifrunner.gnm1.ann1.EM0Y56.1 | A.hypogaea v1.0      | 9.26E-51 | 41 | 257 | AtTET6 AT3G12090 |
| arahy.Tifrunner.gnm1.ann1.B859HK.1 | A.hypogaea v1.0      | 1.47E-49 | 40 | 252 | AtTET6 AT3G12090 |
| Glyma.05G016200.1.p                | G.max Wm82.a4.v1     | 3.26E-49 | 37 | 268 | AtTET6 AT3G12090 |

|                                    |                      |          |    |     |                  |
|------------------------------------|----------------------|----------|----|-----|------------------|
| Phvul.002G140500.1.p               | P.vulgaris v2.1      | 1.49E-48 | 40 | 253 | AtTET6 AT3G12090 |
| arahy.Tifrunner.gnm1.ann1.PNW690.1 | A.hypogaea v1.0      | 3.84E-48 | 39 | 226 | AtTET6 AT3G12090 |
| Medtr8g101600.1                    | M.truncatula Mt4.0v1 | 1.36E-47 | 40 | 253 | AtTET6 AT3G12090 |
| Ca_06587                           | C.arietinum v1.0     | 3.08E-47 | 37 | 259 | AtTET6 AT3G12090 |
| Lcu.2RBY.4g078330.1                | L.culinaris v1       | 3.89E-47 | 41 | 253 | AtTET6 AT3G12090 |
| Lcu.2RBY.7g063730.1                | L.culinaris v1       | 7.53E-47 | 36 | 267 | AtTET6 AT3G12090 |
| Medtr4g112570.1                    | M.truncatula Mt4.0v1 | 9.43E-47 | 37 | 267 | AtTET6 AT3G12090 |
| Glyma.17G069300.2.p                | G.max Wm82.a4.v1     | 6.65E-45 | 44 | 169 | AtTET6 AT3G12090 |
| Phvul.002G287500.1.p               | P.vulgaris v2.1      | 1.21E-44 | 32 | 250 | AtTET6 AT3G12090 |
| Phvul.003G180300.1.p               | P.vulgaris v2.1      | 1.87E-44 | 36 | 267 | AtTET6 AT3G12090 |
| Lj4g0027264.1                      | L.japonicus Lj1.0v1  | 2.84E-44 | 42 | 253 | AtTET6 AT3G12090 |
| arahy.Tifrunner.gnm1.ann1.T23S8A.1 | A.hypogaea v1.0      | 2.93E-44 | 35 | 265 | AtTET6 AT3G12090 |
| Phvul.002G304100.1.p               | P.vulgaris v2.1      | 3.22E-44 | 40 | 253 | AtTET6 AT3G12090 |
| Medtr2g056130.1                    | M.truncatula Mt4.0v1 | 3.81E-44 | 36 | 270 | AtTET6 AT3G12090 |
| arahy.Tifrunner.gnm1.ann1.XJXR2L.1 | A.hypogaea v1.0      | 4.4E-44  | 31 | 260 | AtTET6 AT3G12090 |
| Glyma.08G029100.1.p                | G.max Wm82.a4.v1     | 1.59E-43 | 43 | 253 | AtTET6 AT3G12090 |
| arahy.Tifrunner.gnm1.ann1.Z53AND.1 | A.hypogaea v1.0      | 7.72E-43 | 33 | 265 | AtTET6 AT3G12090 |
| Medtr5g030070.1                    | M.truncatula Mt4.0v1 | 1.47E-42 | 40 | 253 | AtTET6 AT3G12090 |
| Glyma.05G205600.1.p                | G.max Wm82.a4.v1     | 1.7E-42  | 30 | 248 | AtTET6 AT3G12090 |
| Lj4g0018138.1                      | L.japonicus Lj1.0v1  | 1.72E-42 | 35 | 260 | AtTET6 AT3G12090 |
| arahy.Tifrunner.gnm1.ann1.2A0H1U.1 | A.hypogaea v1.0      | 4.19E-42 | 31 | 260 | AtTET6 AT3G12090 |
| Lcu.2RBY.4g075230.1                | L.culinaris v1       | 8.91E-42 | 31 | 241 | AtTET6 AT3G12090 |
| Glyma.04G144500.1.p                | G.max Wm82.a4.v1     | 1.94E-41 | 34 | 274 | AtTET6 AT3G12090 |
| Lj2g0020248.1                      | L.japonicus Lj1.0v1  | 2.11E-41 | 40 | 223 | AtTET6 AT3G12090 |
| Glyma.08G012500.2.p                | G.max Wm82.a4.v1     | 2.98E-41 | 31 | 244 | AtTET6 AT3G12090 |
| Glyma.15G207300.1.p                | G.max Wm82.a4.v1     | 3.38E-41 | 34 | 274 | AtTET6 AT3G12090 |
| Medtr8g097280.1                    | M.truncatula Mt4.0v1 | 6.29E-41 | 32 | 218 | AtTET6 AT3G12090 |
| Phvul.009G191200.1.p               | P.vulgaris v2.1      | 4.77E-40 | 34 | 257 | AtTET6 AT3G12090 |
| Phvul.004G171300.1.p               | P.vulgaris v2.1      | 3.18E-39 | 40 | 255 | AtTET6 AT3G12090 |
| arahy.Tifrunner.gnm1.ann1.QC8A1V.1 | A.hypogaea v1.0      | 3.21E-39 | 35 | 252 | AtTET6 AT3G12090 |
| arahy.Tifrunner.gnm1.ann1.EEBB9D.1 | A.hypogaea v1.0      | 3.21E-39 | 35 | 252 | AtTET6 AT3G12090 |
| Lj4g0013226.1                      | L.japonicus Lj1.0v1  | 3.42E-38 | 31 | 248 | AtTET6 AT3G12090 |
| Ca_25832                           | C.arietinum v1.0     | 3.7E-38  | 36 | 267 | AtTET6 AT3G12090 |
| Lcu.2RBY.2g064540.1                | L.culinaris v1       | 2.02E-36 | 35 | 260 | AtTET6 AT3G12090 |
| Glyma.07G129100.1.p                | G.max Wm82.a4.v1     | 3.47E-36 | 39 | 258 | AtTET6 AT3G12090 |
| Lj1g0003076.1                      | L.japonicus Lj1.0v1  | 4.14E-35 | 32 | 279 | AtTET6 AT3G12090 |
| arahy.Tifrunner.gnm1.ann1.H32RIC.1 | A.hypogaea v1.0      | 1.25E-25 | 33 | 174 | AtTET6 AT3G12090 |



|                                    |                      |           |    |     |                  |
|------------------------------------|----------------------|-----------|----|-----|------------------|
| Ca_05724                           | C.arietinum v1.0     | 4.04E-25  | 25 | 244 | AtTET6 AT3G12090 |
| Glyma.13G091000.1.p                | G.max Wm82.a4.v1     | 4.84E-113 | 66 | 265 | AtTET7 AT4G28050 |
| Phvul.003G151800.1.p               | P.vulgaris v2.1      | 4.89E-110 | 64 | 264 | AtTET7 AT4G28050 |
| Glyma.17G069300.1.p                | G.max Wm82.a4.v1     | 1.46E-107 | 64 | 266 | AtTET7 AT4G28050 |
| Lcu.2RBY.7g075810.1                | L.culinaris v1       | 1.21E-106 | 64 | 265 | AtTET7 AT4G28050 |
| Lj4g0025241.1                      | L.japonicus Lj1.0v1  | 4.47E-106 | 65 | 261 | AtTET7 AT4G28050 |
| arahy.Tifrunner.gnm1.ann1.9I36N1.1 | A.hypogaea v1.0      | 1.56E-105 | 62 | 264 | AtTET7 AT4G28050 |
| arahy.Tifrunner.gnm1.ann1.V2Z0GB.1 | A.hypogaea v1.0      | 1.56E-105 | 62 | 264 | AtTET7 AT4G28050 |
| Medtr4g129670.1                    | M.truncatula Mt4.0v1 | 3.14E-105 | 63 | 263 | AtTET7 AT4G28050 |
| Lj6g0020177.1                      | L.japonicus Lj1.0v1  | 2.43E-104 | 65 | 264 | AtTET7 AT4G28050 |
| Phvul.009G207500.1.p               | P.vulgaris v2.1      | 1.6E-101  | 62 | 261 | AtTET7 AT4G28050 |
| Glyma.04G147100.1.p                | G.max Wm82.a4.v1     | 6.23E-99  | 62 | 260 | AtTET7 AT4G28050 |
| Ca_03295                           | C.arietinum v1.0     | 2.48E-84  | 62 | 239 | AtTET7 AT4G28050 |
| arahy.Tifrunner.gnm1.ann1.8QTZ72.1 | A.hypogaea v1.0      | 4.23E-82  | 52 | 263 | AtTET7 AT4G28050 |
| arahy.Tifrunner.gnm1.ann1.A2QH6A.1 | A.hypogaea v1.0      | 5.08E-73  | 51 | 262 | AtTET7 AT4G28050 |
| arahy.Tifrunner.gnm1.ann1.LZE6LN.1 | A.hypogaea v1.0      | 1.94E-68  | 44 | 261 | AtTET7 AT4G28050 |
| Phvul.007G093400.1.p               | P.vulgaris v2.1      | 2E-68     | 43 | 260 | AtTET7 AT4G28050 |
| Glyma.20G178700.1.p                | G.max Wm82.a4.v1     | 2.01E-67  | 43 | 260 | AtTET7 AT4G28050 |
| Glyma.13G328700.1.p                | G.max Wm82.a4.v1     | 2.35E-67  | 46 | 261 | AtTET7 AT4G28050 |
| Glyma.10G212400.1.p                | G.max Wm82.a4.v1     | 5.83E-67  | 43 | 260 | AtTET7 AT4G28050 |
| Glyma.17G069300.2.p                | G.max Wm82.a4.v1     | 1.16E-66  | 65 | 169 | AtTET7 AT4G28050 |
| Lj2g0015394.1                      | L.japonicus Lj1.0v1  | 1.8E-66   | 44 | 255 | AtTET7 AT4G28050 |
| Lj5g0000955.1                      | L.japonicus Lj1.0v1  | 2.19E-66  | 43 | 260 | AtTET7 AT4G28050 |
| arahy.Tifrunner.gnm1.ann1.Z4U2NE.1 | A.hypogaea v1.0      | 2.46E-66  | 44 | 260 | AtTET7 AT4G28050 |
| Phvul.011G072100.1.p               | P.vulgaris v2.1      | 8.35E-66  | 44 | 263 | AtTET7 AT4G28050 |
| Ca_14606                           | C.arietinum v1.0     | 2.12E-65  | 47 | 263 | AtTET7 AT4G28050 |
| arahy.Tifrunner.gnm1.ann1.Z77BB1.1 | A.hypogaea v1.0      | 4.13E-65  | 44 | 260 | AtTET7 AT4G28050 |
| Phvul.003G284700.1.p               | P.vulgaris v2.1      | 1.16E-64  | 44 | 255 | AtTET7 AT4G28050 |
| Phvul.005G137500.1.p               | P.vulgaris v2.1      | 1.31E-64  | 44 | 260 | AtTET7 AT4G28050 |
| Medtr4g061010.1                    | M.truncatula Mt4.0v1 | 1.89E-64  | 46 | 263 | AtTET7 AT4G28050 |
| Medtr6g033335.1                    | M.truncatula Mt4.0v1 | 1.99E-64  | 44 | 260 | AtTET7 AT4G28050 |
| Glyma.12G072100.1.p                | G.max Wm82.a4.v1     | 2.49E-63  | 47 | 263 | AtTET7 AT4G28050 |
| Lj4g0026647.1                      | L.japonicus Lj1.0v1  | 6.33E-63  | 43 | 255 | AtTET7 AT4G28050 |
| Lcu.2RBY.1g046720.1                | L.culinaris v1       | 6.37E-63  | 41 | 264 | AtTET7 AT4G28050 |
| Phvul.004G071900.1.p               | P.vulgaris v2.1      | 7.17E-63  | 43 | 260 | AtTET7 AT4G28050 |
| Lj2g0026181.1                      | L.japonicus Lj1.0v1  | 8.4E-63   | 43 | 260 | AtTET7 AT4G28050 |
| Glyma.09G205400.1.p                | G.max Wm82.a4.v1     | 9.36E-63  | 44 | 255 | AtTET7 AT4G28050 |

|                                    |                      |          |    |     |                  |
|------------------------------------|----------------------|----------|----|-----|------------------|
| Glyma.01G095700.1.p                | G.max Wm82.a4.v1     | 9.66E-63 | 43 | 255 | AtTET7 AT4G28050 |
| arahy.Tifrunner.gnm1.ann1.JZ8XUN.1 | A.hypogaea v1.0      | 1.66E-62 | 46 | 263 | AtTET7 AT4G28050 |
| Ca_05887                           | C.arietinum v1.0     | 1.75E-62 | 45 | 257 | AtTET7 AT4G28050 |
| Lj3g0001285.1                      | L.japonicus Lj1.0v1  | 2.66E-62 | 46 | 265 | AtTET7 AT4G28050 |
| Phvul.002G140500.1.p               | P.vulgaris v2.1      | 4.17E-62 | 43 | 255 | AtTET7 AT4G28050 |
| arahy.Tifrunner.gnm1.ann1.AUDB51.1 | A.hypogaea v1.0      | 7.08E-62 | 45 | 263 | AtTET7 AT4G28050 |
| Lcu.2RBY.7g030120.1                | L.culinaris v1       | 1.01E-61 | 44 | 255 | AtTET7 AT4G28050 |
| Ca_08501                           | C.arietinum v1.0     | 1.25E-61 | 41 | 260 | AtTET7 AT4G28050 |
| Glyma.16G145400.1.p                | G.max Wm82.a4.v1     | 2.82E-61 | 42 | 260 | AtTET7 AT4G28050 |
| Glyma.11G152124.1.p                | G.max Wm82.a4.v1     | 7.25E-61 | 46 | 260 | AtTET7 AT4G28050 |
| Lcu.2RBY.4g032690.1                | L.culinaris v1       | 8.26E-61 | 45 | 263 | AtTET7 AT4G28050 |
| arahy.Tifrunner.gnm1.ann1.OZGE19.1 | A.hypogaea v1.0      | 1.44E-60 | 42 | 261 | AtTET7 AT4G28050 |
| Ca_11504                           | C.arietinum v1.0     | 6.85E-60 | 43 | 255 | AtTET7 AT4G28050 |
| Glyma.17G084000.1.p                | G.max Wm82.a4.v1     | 7.94E-60 | 39 | 265 | AtTET7 AT4G28050 |
| Lcu.2RBY.5g015480.1                | L.culinaris v1       | 1.24E-59 | 41 | 255 | AtTET7 AT4G28050 |
| Glyma.02G063700.1.p                | G.max Wm82.a4.v1     | 2.83E-59 | 41 | 260 | AtTET7 AT4G28050 |
| Medtr8g101600.1                    | M.truncatula Mt4.0v1 | 3.63E-59 | 42 | 257 | AtTET7 AT4G28050 |
| Medtr1g095530.1                    | M.truncatula Mt4.0v1 | 7.98E-59 | 41 | 260 | AtTET7 AT4G28050 |
| Lcu.2RBY.2g046220.1                | L.culinaris v1       | 1.3E-58  | 41 | 260 | AtTET7 AT4G28050 |
| Medtr8g066790.1                    | M.truncatula Mt4.0v1 | 2.55E-58 | 45 | 255 | AtTET7 AT4G28050 |
| arahy.Tifrunner.gnm1.ann1.B859HK.1 | A.hypogaea v1.0      | 4.1E-58  | 41 | 256 | AtTET7 AT4G28050 |
| Lcu.2RBY.4g078330.1                | L.culinaris v1       | 2.01E-56 | 44 | 257 | AtTET7 AT4G28050 |
| arahy.Tifrunner.gnm1.ann1.PNW690.1 | A.hypogaea v1.0      | 3E-56    | 42 | 228 | AtTET7 AT4G28050 |
| arahy.Tifrunner.gnm1.ann1.Z53AND.1 | A.hypogaea v1.0      | 4E-55    | 40 | 264 | AtTET7 AT4G28050 |
| Glyma.05G016200.1.p                | G.max Wm82.a4.v1     | 2.66E-54 | 39 | 265 | AtTET7 AT4G28050 |
| arahy.Tifrunner.gnm1.ann1.T23S8A.1 | A.hypogaea v1.0      | 6.91E-54 | 39 | 264 | AtTET7 AT4G28050 |
| Lj4g0027264.1                      | L.japonicus Lj1.0v1  | 1.04E-52 | 43 | 257 | AtTET7 AT4G28050 |
| arahy.Tifrunner.gnm1.ann1.N28W6S.1 | A.hypogaea v1.0      | 1.11E-52 | 41 | 261 | AtTET7 AT4G28050 |
| arahy.Tifrunner.gnm1.ann1.EM0Y56.1 | A.hypogaea v1.0      | 1.34E-52 | 41 | 261 | AtTET7 AT4G28050 |
| arahy.Tifrunner.gnm1.ann1.XJXR2L.1 | A.hypogaea v1.0      | 1.87E-52 | 37 | 260 | AtTET7 AT4G28050 |
| Lj4g0018138.1                      | L.japonicus Lj1.0v1  | 2.86E-52 | 38 | 262 | AtTET7 AT4G28050 |
| arahy.Tifrunner.gnm1.ann1.2A0H1U.1 | A.hypogaea v1.0      | 3.32E-52 | 37 | 260 | AtTET7 AT4G28050 |
| arahy.Tifrunner.gnm1.ann1.4R894K.1 | A.hypogaea v1.0      | 4.05E-52 | 37 | 260 | AtTET7 AT4G28050 |
| Phvul.003G180300.1.p               | P.vulgaris v2.1      | 8.85E-52 | 39 | 264 | AtTET7 AT4G28050 |
| arahy.Tifrunner.gnm1.ann1.D9WPRA.1 | A.hypogaea v1.0      | 1.57E-51 | 37 | 260 | AtTET7 AT4G28050 |
| Medtr5g030070.1                    | M.truncatula Mt4.0v1 | 5.75E-51 | 44 | 255 | AtTET7 AT4G28050 |
| Medtr4g112570.1                    | M.truncatula Mt4.0v1 | 1.49E-50 | 39 | 262 | AtTET7 AT4G28050 |

|                                    |                      |           |    |     |                  |
|------------------------------------|----------------------|-----------|----|-----|------------------|
| Ca_06587                           | C.arietinum v1.0     | 2.06E-50  | 38 | 262 | AtTET7 AT4G28050 |
| Phvul.002G287500.1.p               | P.vulgaris v2.1      | 1.85E-49  | 36 | 251 | AtTET7 AT4G28050 |
| Lcu.2RBY.7g063730.1                | L.culinaris v1       | 1.16E-48  | 38 | 262 | AtTET7 AT4G28050 |
| Glyma.08G029100.1.p                | G.max Wm82.a4.v1     | 4.32E-48  | 43 | 258 | AtTET7 AT4G28050 |
| Glyma.05G205600.1.p                | G.max Wm82.a4.v1     | 8.25E-48  | 36 | 247 | AtTET7 AT4G28050 |
| Lj4g0013226.1                      | L.japonicus Lj1.0v1  | 1.07E-47  | 36 | 250 | AtTET7 AT4G28050 |
| Phvul.002G304100.1.p               | P.vulgaris v2.1      | 3.87E-47  | 40 | 257 | AtTET7 AT4G28050 |
| Lcu.2RBY.4g075230.1                | L.culinaris v1       | 4.97E-47  | 36 | 247 | AtTET7 AT4G28050 |
| arahy.Tifrunner.gnm1.ann1.QC8A1V.1 | A.hypogaea v1.0      | 5.68E-47  | 38 | 253 | AtTET7 AT4G28050 |
| arahy.Tifrunner.gnm1.ann1.EEBB9D.1 | A.hypogaea v1.0      | 5.68E-47  | 38 | 253 | AtTET7 AT4G28050 |
| Glyma.08G012500.2.p                | G.max Wm82.a4.v1     | 1.33E-45  | 36 | 247 | AtTET7 AT4G28050 |
| Lj2g0020248.1                      | L.japonicus Lj1.0v1  | 1.04E-44  | 39 | 223 | AtTET7 AT4G28050 |
| Medtr2g056130.1                    | M.truncatula Mt4.0v1 | 3.41E-44  | 41 | 227 | AtTET7 AT4G28050 |
| Phvul.004G171300.1.p               | P.vulgaris v2.1      | 8.09E-43  | 38 | 258 | AtTET7 AT4G28050 |
| Ca_25832                           | C.arietinum v1.0     | 1.08E-42  | 40 | 230 | AtTET7 AT4G28050 |
| Lj1g0003076.1                      | L.japonicus Lj1.0v1  | 3.47E-42  | 38 | 270 | AtTET7 AT4G28050 |
| Medtr8g097280.1                    | M.truncatula Mt4.0v1 | 3.75E-42  | 35 | 227 | AtTET7 AT4G28050 |
| Glyma.07G129100.1.p                | G.max Wm82.a4.v1     | 2.93E-41  | 39 | 269 | AtTET7 AT4G28050 |
| Glyma.04G144500.1.p                | G.max Wm82.a4.v1     | 4.36E-41  | 37 | 263 | AtTET7 AT4G28050 |
| Glyma.15G207300.1.p                | G.max Wm82.a4.v1     | 8.93E-41  | 37 | 263 | AtTET7 AT4G28050 |
| Lcu.2RBY.2g064540.1                | L.culinaris v1       | 4.48E-37  | 37 | 266 | AtTET7 AT4G28050 |
| arahy.Tifrunner.gnm1.ann1.H32RIC.1 | A.hypogaea v1.0      | 1.15E-36  | 41 | 165 | AtTET7 AT4G28050 |
| Phvul.009G191200.1.p               | P.vulgaris v2.1      | 9.06E-36  | 33 | 262 | AtTET7 AT4G28050 |
| Ca_05724                           | C.arietinum v1.0     | 1.93E-35  | 31 | 254 | AtTET7 AT4G28050 |
| arahy.Tifrunner.gnm1.ann1.8RU08H.1 | A.hypogaea v1.0      | 1.62E-30  | 31 | 243 | AtTET7 AT4G28050 |
| Phvul.003G151800.1.p               | P.vulgaris v2.1      | 3.3E-114  | 69 | 263 | AtTET8 AT2G23810 |
| Glyma.13G091000.1.p                | G.max Wm82.a4.v1     | 5.36E-111 | 66 | 270 | AtTET8 AT2G23810 |
| Lcu.2RBY.7g075810.1                | L.culinaris v1       | 1.74E-110 | 67 | 263 | AtTET8 AT2G23810 |
| Glyma.17G069300.1.p                | G.max Wm82.a4.v1     | 1.09E-108 | 64 | 270 | AtTET8 AT2G23810 |
| arahy.Tifrunner.gnm1.ann1.9I36N1.1 | A.hypogaea v1.0      | 2.28E-108 | 66 | 263 | AtTET8 AT2G23810 |
| arahy.Tifrunner.gnm1.ann1.V2Z0GB.1 | A.hypogaea v1.0      | 2.28E-108 | 66 | 263 | AtTET8 AT2G23810 |
| Lj4g0025241.1                      | L.japonicus Lj1.0v1  | 3.56E-107 | 67 | 270 | AtTET8 AT2G23810 |
| Medtr4g129670.1                    | M.truncatula Mt4.0v1 | 1.13E-104 | 66 | 260 | AtTET8 AT2G23810 |
| Lj6g0020177.1                      | L.japonicus Lj1.0v1  | 1.62E-100 | 65 | 263 | AtTET8 AT2G23810 |
| Phvul.009G207500.1.p               | P.vulgaris v2.1      | 3.91E-96  | 62 | 263 | AtTET8 AT2G23810 |
| Glyma.04G147100.1.p                | G.max Wm82.a4.v1     | 4.5E-91   | 62 | 261 | AtTET8 AT2G23810 |
| Ca_03295                           | C.arietinum v1.0     | 1.13E-84  | 66 | 238 | AtTET8 AT2G23810 |

|                                    |                      |          |    |     |                  |
|------------------------------------|----------------------|----------|----|-----|------------------|
| arahy.Tifrunner.gnm1.ann1.8QTZ72.1 | A.hypogaea v1.0      | 1.43E-76 | 53 | 259 | AtTET8 AT2G23810 |
| Glyma.17G069300.2.p                | G.max Wm82.a4.v1     | 9.41E-75 | 67 | 169 | AtTET8 AT2G23810 |
| Phvul.011G072100.1.p               | P.vulgaris v2.1      | 3.23E-72 | 49 | 265 | AtTET8 AT2G23810 |
| arahy.Tifrunner.gnm1.ann1.LZE6LN.1 | A.hypogaea v1.0      | 5.78E-72 | 48 | 263 | AtTET8 AT2G23810 |
| Ca_14606                           | C.arietinum v1.0     | 3.25E-70 | 49 | 265 | AtTET8 AT2G23810 |
| arahy.Tifrunner.gnm1.ann1.A2QH6A.1 | A.hypogaea v1.0      | 4.1E-70  | 53 | 258 | AtTET8 AT2G23810 |
| Medtr4g061010.1                    | M.truncatula Mt4.0v1 | 2.88E-69 | 49 | 265 | AtTET8 AT2G23810 |
| Lcu.2RBY.4g032690.1                | L.culinaris v1       | 1.13E-68 | 48 | 265 | AtTET8 AT2G23810 |
| Lj3g0001285.1                      | L.japonicus Lj1.0v1  | 1.19E-67 | 48 | 266 | AtTET8 AT2G23810 |
| arahy.Tifrunner.gnm1.ann1.JZ8XUN.1 | A.hypogaea v1.0      | 1.37E-67 | 48 | 265 | AtTET8 AT2G23810 |
| arahy.Tifrunner.gnm1.ann1.AUDB51.1 | A.hypogaea v1.0      | 2.11E-67 | 48 | 265 | AtTET8 AT2G23810 |
| Glyma.11G152124.1.p                | G.max Wm82.a4.v1     | 9.94E-67 | 48 | 265 | AtTET8 AT2G23810 |
| Glyma.12G072100.1.p                | G.max Wm82.a4.v1     | 1.75E-66 | 48 | 265 | AtTET8 AT2G23810 |
| Glyma.13G328700.1.p                | G.max Wm82.a4.v1     | 1.42E-65 | 46 | 263 | AtTET8 AT2G23810 |
| Glyma.10G212400.1.p                | G.max Wm82.a4.v1     | 2.1E-65  | 42 | 264 | AtTET8 AT2G23810 |
| Glyma.20G178700.1.p                | G.max Wm82.a4.v1     | 2.5E-65  | 42 | 264 | AtTET8 AT2G23810 |
| Lj5g0000955.1                      | L.japonicus Lj1.0v1  | 3.65E-65 | 42 | 264 | AtTET8 AT2G23810 |
| arahy.Tifrunner.gnm1.ann1.Z4U2NE.1 | A.hypogaea v1.0      | 7.14E-65 | 44 | 264 | AtTET8 AT2G23810 |
| Lj2g0015394.1                      | L.japonicus Lj1.0v1  | 8.69E-65 | 45 | 263 | AtTET8 AT2G23810 |
| arahy.Tifrunner.gnm1.ann1.Z77BB1.1 | A.hypogaea v1.0      | 1.74E-64 | 44 | 264 | AtTET8 AT2G23810 |
| Phvul.007G093400.1.p               | P.vulgaris v2.1      | 1.83E-64 | 41 | 264 | AtTET8 AT2G23810 |
| Medtr6g033335.1                    | M.truncatula Mt4.0v1 | 3.47E-64 | 44 | 264 | AtTET8 AT2G23810 |
| Phvul.004G071900.1.p               | P.vulgaris v2.1      | 1.67E-63 | 42 | 264 | AtTET8 AT2G23810 |
| Lj2g0026181.1                      | L.japonicus Lj1.0v1  | 4.54E-63 | 42 | 264 | AtTET8 AT2G23810 |
| Phvul.005G137500.1.p               | P.vulgaris v2.1      | 9.48E-63 | 46 | 265 | AtTET8 AT2G23810 |
| Ca_08501                           | C.arietinum v1.0     | 1.3E-62  | 40 | 264 | AtTET8 AT2G23810 |
| Lcu.2RBY.1g046720.1                | L.culinaris v1       | 2.78E-62 | 41 | 264 | AtTET8 AT2G23810 |
| Glyma.02G063700.1.p                | G.max Wm82.a4.v1     | 4.83E-62 | 41 | 264 | AtTET8 AT2G23810 |
| Glyma.16G145400.1.p                | G.max Wm82.a4.v1     | 1.97E-61 | 41 | 264 | AtTET8 AT2G23810 |
| Phvul.003G284700.1.p               | P.vulgaris v2.1      | 3E-61    | 44 | 263 | AtTET8 AT2G23810 |
| arahy.Tifrunner.gnm1.ann1.OZGE19.1 | A.hypogaea v1.0      | 5.73E-61 | 44 | 263 | AtTET8 AT2G23810 |
| Glyma.09G205400.1.p                | G.max Wm82.a4.v1     | 4.34E-60 | 42 | 263 | AtTET8 AT2G23810 |
| Glyma.01G095700.1.p                | G.max Wm82.a4.v1     | 5.33E-60 | 43 | 263 | AtTET8 AT2G23810 |
| Glyma.17G084000.1.p                | G.max Wm82.a4.v1     | 1.52E-58 | 39 | 267 | AtTET8 AT2G23810 |
| Phvul.002G140500.1.p               | P.vulgaris v2.1      | 1.1E-57  | 42 | 263 | AtTET8 AT2G23810 |
| Lcu.2RBY.7g030120.1                | L.culinaris v1       | 1.76E-57 | 41 | 263 | AtTET8 AT2G23810 |
| Ca_05887                           | C.arietinum v1.0     | 2.48E-57 | 43 | 263 | AtTET8 AT2G23810 |

|                                    |                      |          |    |     |                  |
|------------------------------------|----------------------|----------|----|-----|------------------|
| Lcu.2RBY.2g046220.1                | L.culinaris v1       | 3.84E-57 | 39 | 264 | AtTET8 AT2G23810 |
| Lj4g0026647.1                      | L.japonicus Lj1.0v1  | 1.2E-56  | 41 | 263 | AtTET8 AT2G23810 |
| Lcu.2RBY.5g015480.1                | L.culinaris v1       | 1.23E-56 | 43 | 263 | AtTET8 AT2G23810 |
| Medtr1g095530.1                    | M.truncatula Mt4.0v1 | 1.67E-56 | 39 | 264 | AtTET8 AT2G23810 |
| Medtr8g101600.1                    | M.truncatula Mt4.0v1 | 5.16E-56 | 42 | 263 | AtTET8 AT2G23810 |
| arahy.Tifrunner.gnm1.ann1.N28W6S.1 | A.hypogaea v1.0      | 7.35E-56 | 43 | 267 | AtTET8 AT2G23810 |
| arahy.Tifrunner.gnm1.ann1.EM0Y56.1 | A.hypogaea v1.0      | 1.01E-55 | 43 | 267 | AtTET8 AT2G23810 |
| Ca_11504                           | C.arietinum v1.0     | 8.19E-55 | 42 | 263 | AtTET8 AT2G23810 |
| arahy.Tifrunner.gnm1.ann1.4R894K.1 | A.hypogaea v1.0      | 2.32E-54 | 37 | 272 | AtTET8 AT2G23810 |
| Lcu.2RBY.4g078330.1                | L.culinaris v1       | 8.79E-54 | 43 | 263 | AtTET8 AT2G23810 |
| arahy.Tifrunner.gnm1.ann1.B859HK.1 | A.hypogaea v1.0      | 1.71E-53 | 40 | 260 | AtTET8 AT2G23810 |
| Glyma.05G016200.1.p                | G.max Wm82.a4.v1     | 8.57E-53 | 39 | 264 | AtTET8 AT2G23810 |
| arahy.Tifrunner.gnm1.ann1.D9WPRA.1 | A.hypogaea v1.0      | 9.42E-53 | 38 | 264 | AtTET8 AT2G23810 |
| arahy.Tifrunner.gnm1.ann1.XJXR2L.1 | A.hypogaea v1.0      | 3.73E-52 | 37 | 259 | AtTET8 AT2G23810 |
| arahy.Tifrunner.gnm1.ann1.PNW690.1 | A.hypogaea v1.0      | 6.19E-52 | 41 | 229 | AtTET8 AT2G23810 |
| Medtr8g066790.1                    | M.truncatula Mt4.0v1 | 7.31E-52 | 41 | 263 | AtTET8 AT2G23810 |
| Lj4g0027264.1                      | L.japonicus Lj1.0v1  | 1.11E-51 | 41 | 263 | AtTET8 AT2G23810 |
| Phvul.002G287500.1.p               | P.vulgaris v2.1      | 1.69E-51 | 38 | 253 | AtTET8 AT2G23810 |
| arahy.Tifrunner.gnm1.ann1.2A0H1U.1 | A.hypogaea v1.0      | 1.92E-51 | 37 | 259 | AtTET8 AT2G23810 |
| Lj4g0018138.1                      | L.japonicus Lj1.0v1  | 3.74E-51 | 40 | 265 | AtTET8 AT2G23810 |
| Phvul.003G180300.1.p               | P.vulgaris v2.1      | 6.13E-51 | 39 | 266 | AtTET8 AT2G23810 |
| Medtr4g112570.1                    | M.truncatula Mt4.0v1 | 4.13E-50 | 41 | 264 | AtTET8 AT2G23810 |
| Glyma.05G205600.1.p                | G.max Wm82.a4.v1     | 9.3E-50  | 37 | 253 | AtTET8 AT2G23810 |
| Lcu.2RBY.4g075230.1                | L.culinaris v1       | 1E-49    | 37 | 253 | AtTET8 AT2G23810 |
| arahy.Tifrunner.gnm1.ann1.Z53AND.1 | A.hypogaea v1.0      | 1.85E-49 | 38 | 276 | AtTET8 AT2G23810 |
| Phvul.002G304100.1.p               | P.vulgaris v2.1      | 2.53E-49 | 42 | 263 | AtTET8 AT2G23810 |
| arahy.Tifrunner.gnm1.ann1.T23S8A.1 | A.hypogaea v1.0      | 3.53E-49 | 38 | 276 | AtTET8 AT2G23810 |
| Lcu.2RBY.7g063730.1                | L.culinaris v1       | 1.8E-48  | 39 | 262 | AtTET8 AT2G23810 |
| Glyma.08G012500.2.p                | G.max Wm82.a4.v1     | 3.53E-48 | 36 | 253 | AtTET8 AT2G23810 |
| Lj4g0013226.1                      | L.japonicus Lj1.0v1  | 3.93E-48 | 39 | 253 | AtTET8 AT2G23810 |
| Ca_06587                           | C.arietinum v1.0     | 7.57E-48 | 40 | 263 | AtTET8 AT2G23810 |
| Glyma.08G029100.1.p                | G.max Wm82.a4.v1     | 1.36E-46 | 43 | 263 | AtTET8 AT2G23810 |
| Medtr5g030070.1                    | M.truncatula Mt4.0v1 | 5.72E-46 | 43 | 263 | AtTET8 AT2G23810 |
| Phvul.004G171300.1.p               | P.vulgaris v2.1      | 3.36E-45 | 39 | 266 | AtTET8 AT2G23810 |
| Medtr8g097280.1                    | M.truncatula Mt4.0v1 | 5.39E-45 | 36 | 224 | AtTET8 AT2G23810 |
| Lj2g0020248.1                      | L.japonicus Lj1.0v1  | 1.13E-44 | 38 | 224 | AtTET8 AT2G23810 |
| Lj1g0003076.1                      | L.japonicus Lj1.0v1  | 1.12E-43 | 37 | 278 | AtTET8 AT2G23810 |

|                                    |                      |           |    |     |                  |
|------------------------------------|----------------------|-----------|----|-----|------------------|
| Glyma.04G144500.1.p                | G.max Wm82.a4.v1     | 1.93E-43  | 37 | 265 | AtTET8 AT2G23810 |
| Glyma.15G207300.1.p                | G.max Wm82.a4.v1     | 3.4E-43   | 38 | 265 | AtTET8 AT2G23810 |
| Medtr2g056130.1                    | M.truncatula Mt4.0v1 | 6.24E-42  | 39 | 265 | AtTET8 AT2G23810 |
| Ca_25832                           | C.arietinum v1.0     | 6.93E-42  | 39 | 273 | AtTET8 AT2G23810 |
| Phvul.009G191200.1.p               | P.vulgaris v2.1      | 4.22E-41  | 35 | 265 | AtTET8 AT2G23810 |
| arahy.Tifrunner.gnm1.ann1.QC8A1V.1 | A.hypogaea v1.0      | 3.86E-40  | 37 | 263 | AtTET8 AT2G23810 |
| arahy.Tifrunner.gnm1.ann1.EEBB9D.1 | A.hypogaea v1.0      | 3.86E-40  | 37 | 263 | AtTET8 AT2G23810 |
| Glyma.07G129100.1.p                | G.max Wm82.a4.v1     | 3.91E-39  | 38 | 265 | AtTET8 AT2G23810 |
| Ca_05724                           | C.arietinum v1.0     | 4.82E-38  | 32 | 253 | AtTET8 AT2G23810 |
| Lcu.2RBY.2g064540.1                | L.culinaris v1       | 4.92E-36  | 37 | 263 | AtTET8 AT2G23810 |
| arahy.Tifrunner.gnm1.ann1.H32RIC.1 | A.hypogaea v1.0      | 3.94E-33  | 35 | 268 | AtTET8 AT2G23810 |
| Ca_23646                           | C.arietinum v1.0     | 3.86E-27  | 40 | 154 | AtTET8 AT2G23810 |
| Phvul.003G151800.1.p               | P.vulgaris v2.1      | 1.23E-105 | 59 | 266 | AtTET9 AT4G30430 |
| Glyma.13G091000.1.p                | G.max Wm82.a4.v1     | 3.08E-102 | 58 | 265 | AtTET9 AT4G30430 |
| Lj4g0025241.1                      | L.japonicus Lj1.0v1  | 9.28E-102 | 59 | 262 | AtTET9 AT4G30430 |
| arahy.Tifrunner.gnm1.ann1.9I36N1.1 | A.hypogaea v1.0      | 1.37E-100 | 58 | 264 | AtTET9 AT4G30430 |
| arahy.Tifrunner.gnm1.ann1.V2Z0GB.1 | A.hypogaea v1.0      | 1.37E-100 | 58 | 264 | AtTET9 AT4G30430 |
| Glyma.17G069300.1.p                | G.max Wm82.a4.v1     | 1.71E-100 | 58 | 265 | AtTET9 AT4G30430 |
| Lcu.2RBY.7g075810.1                | L.culinaris v1       | 2.04E-98  | 56 | 266 | AtTET9 AT4G30430 |
| Medtr4g129670.1                    | M.truncatula Mt4.0v1 | 3.84E-98  | 58 | 265 | AtTET9 AT4G30430 |
| Lj6g0020177.1                      | L.japonicus Lj1.0v1  | 2.9E-96   | 58 | 266 | AtTET9 AT4G30430 |
| Phvul.009G207500.1.p               | P.vulgaris v2.1      | 3.27E-92  | 56 | 262 | AtTET9 AT4G30430 |
| Glyma.04G147100.1.p                | G.max Wm82.a4.v1     | 3.76E-91  | 58 | 262 | AtTET9 AT4G30430 |
| Ca_03295                           | C.arietinum v1.0     | 3.58E-77  | 56 | 241 | AtTET9 AT4G30430 |
| arahy.Tifrunner.gnm1.ann1.8QTZ72.1 | A.hypogaea v1.0      | 1.71E-72  | 48 | 261 | AtTET9 AT4G30430 |
| Phvul.004G071900.1.p               | P.vulgaris v2.1      | 5.53E-69  | 41 | 270 | AtTET9 AT4G30430 |
| arahy.Tifrunner.gnm1.ann1.LZE6LN.1 | A.hypogaea v1.0      | 1.64E-68  | 43 | 271 | AtTET9 AT4G30430 |
| Phvul.011G072100.1.p               | P.vulgaris v2.1      | 3.8E-68   | 45 | 273 | AtTET9 AT4G30430 |
| Medtr6g033335.1                    | M.truncatula Mt4.0v1 | 2.03E-67  | 40 | 270 | AtTET9 AT4G30430 |
| arahy.Tifrunner.gnm1.ann1.Z77BB1.1 | A.hypogaea v1.0      | 2.92E-67  | 40 | 270 | AtTET9 AT4G30430 |
| arahy.Tifrunner.gnm1.ann1.Z4U2NE.1 | A.hypogaea v1.0      | 4.18E-67  | 40 | 270 | AtTET9 AT4G30430 |
| Lj5g0000955.1                      | L.japonicus Lj1.0v1  | 4.28E-67  | 40 | 270 | AtTET9 AT4G30430 |
| Lj2g0015394.1                      | L.japonicus Lj1.0v1  | 9.53E-67  | 43 | 262 | AtTET9 AT4G30430 |
| Glyma.10G212400.1.p                | G.max Wm82.a4.v1     | 1.49E-66  | 40 | 271 | AtTET9 AT4G30430 |
| Glyma.16G145400.1.p                | G.max Wm82.a4.v1     | 2.4E-66   | 40 | 270 | AtTET9 AT4G30430 |
| arahy.Tifrunner.gnm1.ann1.A2QH6A.1 | A.hypogaea v1.0      | 6.33E-66  | 47 | 260 | AtTET9 AT4G30430 |
| Lj2g0026181.1                      | L.japonicus Lj1.0v1  | 8.85E-66  | 41 | 270 | AtTET9 AT4G30430 |

|                                    |                      |          |    |     |                  |
|------------------------------------|----------------------|----------|----|-----|------------------|
| Glyma.20G178700.1.p                | G.max Wm82.a4.v1     | 1.6E-65  | 40 | 260 | AtTET9 AT4G30430 |
| Glyma.02G063700.1.p                | G.max Wm82.a4.v1     | 3.16E-65 | 39 | 270 | AtTET9 AT4G30430 |
| Phvul.007G093400.1.p               | P.vulgaris v2.1      | 4.93E-65 | 38 | 271 | AtTET9 AT4G30430 |
| Glyma.12G072100.1.p                | G.max Wm82.a4.v1     | 6.57E-65 | 44 | 273 | AtTET9 AT4G30430 |
| Glyma.11G152124.1.p                | G.max Wm82.a4.v1     | 1.56E-64 | 44 | 273 | AtTET9 AT4G30430 |
| Lj3g0001285.1                      | L.japonicus Lj1.0v1  | 2.4E-64  | 44 | 274 | AtTET9 AT4G30430 |
| arahy.Tifrunner.gnm1.ann1.JZ8XUN.1 | A.hypogaea v1.0      | 2.9E-64  | 44 | 273 | AtTET9 AT4G30430 |
| Glyma.09G205400.1.p                | G.max Wm82.a4.v1     | 3.08E-64 | 40 | 258 | AtTET9 AT4G30430 |
| Phvul.003G284700.1.p               | P.vulgaris v2.1      | 3.96E-64 | 41 | 258 | AtTET9 AT4G30430 |
| Glyma.17G069300.2.p                | G.max Wm82.a4.v1     | 6.46E-64 | 59 | 169 | AtTET9 AT4G30430 |
| Glyma.13G328700.1.p                | G.max Wm82.a4.v1     | 7.1E-64  | 43 | 264 | AtTET9 AT4G30430 |
| Medtr4g061010.1                    | M.truncatula Mt4.0v1 | 8.11E-64 | 44 | 273 | AtTET9 AT4G30430 |
| arahy.Tifrunner.gnm1.ann1.AUDB51.1 | A.hypogaea v1.0      | 8.65E-64 | 44 | 273 | AtTET9 AT4G30430 |
| Glyma.01G095700.1.p                | G.max Wm82.a4.v1     | 4.29E-63 | 39 | 262 | AtTET9 AT4G30430 |
| Lcu.2RBY.1g046720.1                | L.culinaris v1       | 6.52E-63 | 38 | 270 | AtTET9 AT4G30430 |
| Lcu.2RBY.4g032690.1                | L.culinaris v1       | 7.46E-63 | 44 | 273 | AtTET9 AT4G30430 |
| Lcu.2RBY.2g046220.1                | L.culinaris v1       | 1.08E-62 | 39 | 270 | AtTET9 AT4G30430 |
| Ca_08501                           | C.arietinum v1.0     | 1.88E-62 | 39 | 270 | AtTET9 AT4G30430 |
| Ca_14606                           | C.arietinum v1.0     | 3.32E-62 | 43 | 273 | AtTET9 AT4G30430 |
| Lcu.2RBY.7g030120.1                | L.culinaris v1       | 3.69E-60 | 39 | 262 | AtTET9 AT4G30430 |
| Phvul.002G140500.1.p               | P.vulgaris v2.1      | 6.76E-60 | 40 | 257 | AtTET9 AT4G30430 |
| Ca_11504                           | C.arietinum v1.0     | 1.34E-59 | 41 | 262 | AtTET9 AT4G30430 |
| arahy.Tifrunner.gnm1.ann1.OZGE19.1 | A.hypogaea v1.0      | 1.79E-59 | 40 | 271 | AtTET9 AT4G30430 |
| Lcu.2RBY.5g015480.1                | L.culinaris v1       | 1.93E-59 | 41 | 262 | AtTET9 AT4G30430 |
| Glyma.17G084000.1.p                | G.max Wm82.a4.v1     | 2.47E-59 | 37 | 266 | AtTET9 AT4G30430 |
| Phvul.005G137500.1.p               | P.vulgaris v2.1      | 5.48E-59 | 44 | 235 | AtTET9 AT4G30430 |
| Lj4g0026647.1                      | L.japonicus Lj1.0v1  | 7.07E-59 | 40 | 262 | AtTET9 AT4G30430 |
| Medtr1g095530.1                    | M.truncatula Mt4.0v1 | 3.14E-58 | 38 | 270 | AtTET9 AT4G30430 |
| Ca_05887                           | C.arietinum v1.0     | 3.08E-57 | 40 | 263 | AtTET9 AT4G30430 |
| arahy.Tifrunner.gnm1.ann1.4R894K.1 | A.hypogaea v1.0      | 2.83E-56 | 36 | 270 | AtTET9 AT4G30430 |
| Medtr8g066790.1                    | M.truncatula Mt4.0v1 | 4.39E-56 | 39 | 262 | AtTET9 AT4G30430 |
| Medtr8g101600.1                    | M.truncatula Mt4.0v1 | 1.52E-55 | 37 | 263 | AtTET9 AT4G30430 |
| arahy.Tifrunner.gnm1.ann1.D9WPRA.1 | A.hypogaea v1.0      | 2.92E-54 | 36 | 270 | AtTET9 AT4G30430 |
| arahy.Tifrunner.gnm1.ann1.Z53AND.1 | A.hypogaea v1.0      | 6.21E-54 | 38 | 272 | AtTET9 AT4G30430 |
| arahy.Tifrunner.gnm1.ann1.B859HK.1 | A.hypogaea v1.0      | 3.12E-53 | 36 | 259 | AtTET9 AT4G30430 |
| arahy.Tifrunner.gnm1.ann1.N28W6S.1 | A.hypogaea v1.0      | 9.81E-53 | 38 | 266 | AtTET9 AT4G30430 |
| arahy.Tifrunner.gnm1.ann1.EM0Y56.1 | A.hypogaea v1.0      | 1.14E-52 | 38 | 266 | AtTET9 AT4G30430 |

|                                    |                      |          |    |     |                   |
|------------------------------------|----------------------|----------|----|-----|-------------------|
| Glyma.05G016200.1.p                | G.max Wm82.a4.v1     | 1.69E-52 | 37 | 266 | AtTET9 AT4G30430  |
| Lcu.2RBY.4g078330.1                | L.culinaris v1       | 4.55E-52 | 38 | 263 | AtTET9 AT4G30430  |
| Phvul.003G180300.1.p               | P.vulgaris v2.1      | 4.72E-52 | 39 | 263 | AtTET9 AT4G30430  |
| Medtr4g112570.1                    | M.truncatula Mt4.0v1 | 4.84E-52 | 39 | 267 | AtTET9 AT4G30430  |
| arahy.Tifrunner.gnm1.ann1.T23S8A.1 | A.hypogaea v1.0      | 1.15E-51 | 37 | 272 | AtTET9 AT4G30430  |
| arahy.Tifrunner.gnm1.ann1.PNW690.1 | A.hypogaea v1.0      | 6.43E-51 | 37 | 230 | AtTET9 AT4G30430  |
| Lj4g0027264.1                      | L.japonicus Lj1.0v1  | 1.4E-50  | 38 | 263 | AtTET9 AT4G30430  |
| Medtr5g030070.1                    | M.truncatula Mt4.0v1 | 3.93E-50 | 41 | 262 | AtTET9 AT4G30430  |
| Lcu.2RBY.7g063730.1                | L.culinaris v1       | 1.55E-49 | 38 | 261 | AtTET9 AT4G30430  |
| Lj4g0018138.1                      | L.japonicus Lj1.0v1  | 3.47E-49 | 37 | 263 | AtTET9 AT4G30430  |
| Ca_06587                           | C.arietinum v1.0     | 1.27E-48 | 38 | 261 | AtTET9 AT4G30430  |
| arahy.Tifrunner.gnm1.ann1.XJXR2L.1 | A.hypogaea v1.0      | 2.03E-47 | 34 | 256 | AtTET9 AT4G30430  |
| arahy.Tifrunner.gnm1.ann1.2A0H1U.1 | A.hypogaea v1.0      | 8.2E-47  | 34 | 256 | AtTET9 AT4G30430  |
| Phvul.002G304100.1.p               | P.vulgaris v2.1      | 3.35E-46 | 37 | 263 | AtTET9 AT4G30430  |
| Phvul.002G287500.1.p               | P.vulgaris v2.1      | 6.16E-45 | 34 | 256 | AtTET9 AT4G30430  |
| Glyma.08G029100.1.p                | G.max Wm82.a4.v1     | 6.97E-45 | 38 | 264 | AtTET9 AT4G30430  |
| arahy.Tifrunner.gnm1.ann1.QC8A1V.1 | A.hypogaea v1.0      | 1.01E-44 | 34 | 263 | AtTET9 AT4G30430  |
| arahy.Tifrunner.gnm1.ann1.EEBB9D.1 | A.hypogaea v1.0      | 1.01E-44 | 34 | 263 | AtTET9 AT4G30430  |
| Glyma.05G205600.1.p                | G.max Wm82.a4.v1     | 4.34E-43 | 34 | 247 | AtTET9 AT4G30430  |
| Lcu.2RBY.4g075230.1                | L.culinaris v1       | 3.66E-42 | 33 | 252 | AtTET9 AT4G30430  |
| Lj1g0003076.1                      | L.japonicus Lj1.0v1  | 6.33E-42 | 36 | 278 | AtTET9 AT4G30430  |
| Glyma.08G012500.2.p                | G.max Wm82.a4.v1     | 1.25E-41 | 34 | 247 | AtTET9 AT4G30430  |
| Glyma.15G207300.1.p                | G.max Wm82.a4.v1     | 1.53E-41 | 35 | 263 | AtTET9 AT4G30430  |
| Glyma.04G144500.1.p                | G.max Wm82.a4.v1     | 1.63E-41 | 35 | 263 | AtTET9 AT4G30430  |
| Lj2g0020248.1                      | L.japonicus Lj1.0v1  | 1.68E-41 | 34 | 223 | AtTET9 AT4G30430  |
| Phvul.004G171300.1.p               | P.vulgaris v2.1      | 3.57E-41 | 34 | 262 | AtTET9 AT4G30430  |
| Medtr8g097280.1                    | M.truncatula Mt4.0v1 | 5.89E-41 | 33 | 221 | AtTET9 AT4G30430  |
| Ca_25832                           | C.arietinum v1.0     | 8.8E-40  | 37 | 262 | AtTET9 AT4G30430  |
| Medtr2g056130.1                    | M.truncatula Mt4.0v1 | 3.66E-39 | 35 | 265 | AtTET9 AT4G30430  |
| Lj4g0013226.1                      | L.japonicus Lj1.0v1  | 5.5E-38  | 34 | 247 | AtTET9 AT4G30430  |
| Lcu.2RBY.2g064540.1                | L.culinaris v1       | 2.66E-37 | 34 | 264 | AtTET9 AT4G30430  |
| Glyma.07G129100.1.p                | G.max Wm82.a4.v1     | 3.11E-37 | 35 | 266 | AtTET9 AT4G30430  |
| Phvul.009G191200.1.p               | P.vulgaris v2.1      | 1.27E-33 | 32 | 264 | AtTET9 AT4G30430  |
| Ca_05724                           | C.arietinum v1.0     | 5.7E-32  | 28 | 247 | AtTET9 AT4G30430  |
| arahy.Tifrunner.gnm1.ann1.H32RIC.1 | A.hypogaea v1.0      | 2.2E-26  | 31 | 262 | AtTET9 AT4G30430  |
| arahy.Tifrunner.gnm1.ann1.8RU08H.1 | A.hypogaea v1.0      | 2.69E-25 | 29 | 243 | AtTET9 AT4G30430  |
| Phvul.002G287500.1.p               | P.vulgaris v2.1      | 3.8E-107 | 77 | 230 | AtTET10 AT1G63260 |



|                                    |                      |           |    |     |                   |
|------------------------------------|----------------------|-----------|----|-----|-------------------|
| arahy.Tifrunner.gnm1.ann1.XJXR2L.1 | A.hypogaea v1.0      | 8.64E-107 | 76 | 230 | AtTET10 AT1G63260 |
| arahy.Tifrunner.gnm1.ann1.2A0H1U.1 | A.hypogaea v1.0      | 1.43E-106 | 76 | 230 | AtTET10 AT1G63260 |
| Glyma.05G205600.1.p                | G.max Wm82.a4.v1     | 3.94E-106 | 77 | 230 | AtTET10 AT1G63260 |
| Glyma.08G012500.2.p                | G.max Wm82.a4.v1     | 1.14E-105 | 77 | 230 | AtTET10 AT1G63260 |
| Lcu.2RBY.4g075230.1                | L.culinaris v1       | 1.48E-103 | 74 | 230 | AtTET10 AT1G63260 |
| Medtr8g097280.1                    | M.truncatula Mt4.0v1 | 1.89E-102 | 73 | 230 | AtTET10 AT1G63260 |
| Lj4g0013226.1                      | L.japonicus Lj1.0v1  | 2.48E-102 | 74 | 230 | AtTET10 AT1G63260 |
| Ca_05724                           | C.arietinum v1.0     | 2.79E-92  | 65 | 230 | AtTET10 AT1G63260 |
| arahy.Tifrunner.gnm1.ann1.H32RIC.1 | A.hypogaea v1.0      | 8.05E-80  | 60 | 216 | AtTET10 AT1G63260 |
| arahy.Tifrunner.gnm1.ann1.8RU08H.1 | A.hypogaea v1.0      | 7.23E-68  | 54 | 216 | AtTET10 AT1G63260 |
| Phvul.003G284700.1.p               | P.vulgaris v2.1      | 6.32E-40  | 36 | 229 | AtTET10 AT1G63260 |
| arahy.Tifrunner.gnm1.ann1.9I36N1.1 | A.hypogaea v1.0      | 2.64E-39  | 40 | 221 | AtTET10 AT1G63260 |
| arahy.Tifrunner.gnm1.ann1.V2Z0GB.1 | A.hypogaea v1.0      | 2.64E-39  | 40 | 221 | AtTET10 AT1G63260 |
| Phvul.003G151800.1.p               | P.vulgaris v2.1      | 3.41E-39  | 40 | 225 | AtTET10 AT1G63260 |
| Glyma.01G095700.1.p                | G.max Wm82.a4.v1     | 3.51E-39  | 37 | 229 | AtTET10 AT1G63260 |
| Lj4g0026647.1                      | L.japonicus Lj1.0v1  | 6.04E-39  | 35 | 229 | AtTET10 AT1G63260 |
| arahy.Tifrunner.gnm1.ann1.LZE6LN.1 | A.hypogaea v1.0      | 1.11E-38  | 38 | 230 | AtTET10 AT1G63260 |
| Lj4g0025241.1                      | L.japonicus Lj1.0v1  | 1.24E-38  | 39 | 228 | AtTET10 AT1G63260 |
| Glyma.13G091000.1.p                | G.max Wm82.a4.v1     | 4.21E-38  | 41 | 226 | AtTET10 AT1G63260 |
| Glyma.17G069300.1.p                | G.max Wm82.a4.v1     | 1.28E-37  | 41 | 226 | AtTET10 AT1G63260 |
| Phvul.011G072100.1.p               | P.vulgaris v2.1      | 5.8E-37   | 37 | 234 | AtTET10 AT1G63260 |
| Lcu.2RBY.7g030120.1                | L.culinaris v1       | 1.44E-36  | 35 | 229 | AtTET10 AT1G63260 |
| Lcu.2RBY.7g075810.1                | L.culinaris v1       | 1.98E-36  | 36 | 225 | AtTET10 AT1G63260 |
| Ca_14606                           | C.arietinum v1.0     | 2.02E-36  | 35 | 234 | AtTET10 AT1G63260 |
| Medtr8g066790.1                    | M.truncatula Mt4.0v1 | 3.54E-36  | 35 | 229 | AtTET10 AT1G63260 |
| Glyma.09G205400.1.p                | G.max Wm82.a4.v1     | 5.53E-36  | 34 | 229 | AtTET10 AT1G63260 |
| Phvul.002G140500.1.p               | P.vulgaris v2.1      | 3.45E-35  | 34 | 229 | AtTET10 AT1G63260 |
| Lcu.2RBY.5g015480.1                | L.culinaris v1       | 1.12E-34  | 34 | 229 | AtTET10 AT1G63260 |
| Lcu.2RBY.4g032690.1                | L.culinaris v1       | 1.18E-34  | 36 | 234 | AtTET10 AT1G63260 |
| Medtr4g061010.1                    | M.truncatula Mt4.0v1 | 1.61E-34  | 35 | 234 | AtTET10 AT1G63260 |
| Lj2g0015394.1                      | L.japonicus Lj1.0v1  | 2.75E-34  | 35 | 229 | AtTET10 AT1G63260 |
| arahy.Tifrunner.gnm1.ann1.JZ8XUN.1 | A.hypogaea v1.0      | 3.62E-34  | 33 | 234 | AtTET10 AT1G63260 |
| Ca_11504                           | C.arietinum v1.0     | 9.16E-34  | 34 | 229 | AtTET10 AT1G63260 |
| Lj6g0020177.1                      | L.japonicus Lj1.0v1  | 9.58E-34  | 38 | 213 | AtTET10 AT1G63260 |
| arahy.Tifrunner.gnm1.ann1.AUDB51.1 | A.hypogaea v1.0      | 1.15E-33  | 33 | 234 | AtTET10 AT1G63260 |
| Glyma.12G072100.1.p                | G.max Wm82.a4.v1     | 1.2E-33   | 35 | 234 | AtTET10 AT1G63260 |
| Ca_05887                           | C.arietinum v1.0     | 5.45E-33  | 34 | 229 | AtTET10 AT1G63260 |

|                                    |                      |          |    |     |                   |
|------------------------------------|----------------------|----------|----|-----|-------------------|
| Phvul.009G207500.1.p               | P.vulgaris v2.1      | 9.37E-33 | 38 | 221 | AtTET10 AT1G63260 |
| Medtr4g129670.1                    | M.truncatula Mt4.0v1 | 1.62E-32 | 35 | 231 | AtTET10 AT1G63260 |
| Phvul.005G137500.1.p               | P.vulgaris v2.1      | 1.95E-32 | 32 | 234 | AtTET10 AT1G63260 |
| Medtr5g030070.1                    | M.truncatula Mt4.0v1 | 2.59E-32 | 33 | 229 | AtTET10 AT1G63260 |
| Lj3g0001285.1                      | L.japonicus Lj1.0v1  | 3.38E-32 | 35 | 235 | AtTET10 AT1G63260 |
| Glyma.13G328700.1.p                | G.max Wm82.a4.v1     | 4.38E-32 | 35 | 235 | AtTET10 AT1G63260 |
| Glyma.11G152124.1.p                | G.max Wm82.a4.v1     | 1.68E-31 | 35 | 234 | AtTET10 AT1G63260 |
| arahy.Tifrunner.gnm1.ann1.PNW690.1 | A.hypogaea v1.0      | 2.66E-31 | 33 | 229 | AtTET10 AT1G63260 |
| Lj5g0000955.1                      | L.japonicus Lj1.0v1  | 7.69E-31 | 36 | 225 | AtTET10 AT1G63260 |
| Lj4g0027264.1                      | L.japonicus Lj1.0v1  | 1.55E-30 | 33 | 229 | AtTET10 AT1G63260 |
| Medtr8g101600.1                    | M.truncatula Mt4.0v1 | 2.41E-30 | 31 | 229 | AtTET10 AT1G63260 |
| arahy.Tifrunner.gnm1.ann1.B859HK.1 | A.hypogaea v1.0      | 1.09E-29 | 32 | 229 | AtTET10 AT1G63260 |
| Lcu.2RBY.1g046720.1                | L.culinaris v1       | 2.23E-29 | 36 | 225 | AtTET10 AT1G63260 |
| Phvul.002G304100.1.p               | P.vulgaris v2.1      | 2.32E-29 | 33 | 229 | AtTET10 AT1G63260 |
| Glyma.04G147100.1.p                | G.max Wm82.a4.v1     | 3.63E-29 | 37 | 212 | AtTET10 AT1G63260 |
| Glyma.10G212400.1.p                | G.max Wm82.a4.v1     | 4.05E-29 | 34 | 225 | AtTET10 AT1G63260 |
| Glyma.08G029100.1.p                | G.max Wm82.a4.v1     | 5.19E-29 | 33 | 229 | AtTET10 AT1G63260 |
| Ca_08501                           | C.arietinum v1.0     | 5.72E-29 | 36 | 225 | AtTET10 AT1G63260 |
| Glyma.20G178700.1.p                | G.max Wm82.a4.v1     | 5.84E-29 | 34 | 225 | AtTET10 AT1G63260 |
| arahy.Tifrunner.gnm1.ann1.OZGE19.1 | A.hypogaea v1.0      | 6.81E-29 | 35 | 230 | AtTET10 AT1G63260 |
| arahy.Tifrunner.gnm1.ann1.Z4U2NE.1 | A.hypogaea v1.0      | 1.1E-28  | 34 | 227 | AtTET10 AT1G63260 |
| arahy.Tifrunner.gnm1.ann1.Z77BB1.1 | A.hypogaea v1.0      | 1.2E-28  | 34 | 227 | AtTET10 AT1G63260 |
| Glyma.02G063700.1.p                | G.max Wm82.a4.v1     | 1.34E-28 | 33 | 225 | AtTET10 AT1G63260 |
| Phvul.007G093400.1.p               | P.vulgaris v2.1      | 2.11E-28 | 33 | 225 | AtTET10 AT1G63260 |
| Lcu.2RBY.4g078330.1                | L.culinaris v1       | 2.41E-28 | 33 | 229 | AtTET10 AT1G63260 |
| Phvul.004G071900.1.p               | P.vulgaris v2.1      | 2.85E-28 | 32 | 222 | AtTET10 AT1G63260 |
| Medtr6g033335.1                    | M.truncatula Mt4.0v1 | 2.91E-28 | 33 | 222 | AtTET10 AT1G63260 |
| Lj2g0026181.1                      | L.japonicus Lj1.0v1  | 1.14E-27 | 33 | 225 | AtTET10 AT1G63260 |
| Glyma.16G145400.1.p                | G.max Wm82.a4.v1     | 1.26E-27 | 32 | 225 | AtTET10 AT1G63260 |
| arahy.Tifrunner.gnm1.ann1.N28W6S.1 | A.hypogaea v1.0      | 1.79E-27 | 32 | 228 | AtTET10 AT1G63260 |
| arahy.Tifrunner.gnm1.ann1.EM0Y56.1 | A.hypogaea v1.0      | 1.99E-27 | 32 | 228 | AtTET10 AT1G63260 |
| Ca_03295                           | C.arietinum v1.0     | 3.75E-26 | 39 | 207 | AtTET10 AT1G63260 |
| Phvul.004G171300.1.p               | P.vulgaris v2.1      | 2.73E-25 | 35 | 137 | AtTET10 AT1G63260 |
| arahy.Tifrunner.gnm1.ann1.8QTZ72.1 | A.hypogaea v1.0      | 8.07E-25 | 34 | 231 | AtTET10 AT1G63260 |
| Lcu.2RBY.7g063730.1                | L.culinaris v1       | 9.53E-25 | 34 | 138 | AtTET10 AT1G63260 |
| Lj2g0020248.1                      | L.japonicus Lj1.0v1  | 2.41E-24 | 33 | 227 | AtTET10 AT1G63260 |
| Lcu.2RBY.2g046220.1                | L.culinaris v1       | 3E-24    | 34 | 222 | AtTET10 AT1G63260 |

|                                    |                      |          |    |     |                   |
|------------------------------------|----------------------|----------|----|-----|-------------------|
| Medtr1g095530.1                    | M.truncatula Mt4.0v1 | 3.39E-24 | 33 | 210 | AtTET10 AT1G63260 |
| Glyma.05G016200.1.p                | G.max Wm82.a4.v1     | 4.29E-24 | 31 | 229 | AtTET10 AT1G63260 |
| Ca_06587                           | C.arietinum v1.0     | 1.33E-23 | 34 | 137 | AtTET10 AT1G63260 |
| Medtr4g112570.1                    | M.truncatula Mt4.0v1 | 5.6E-23  | 33 | 139 | AtTET10 AT1G63260 |
| Glyma.17G084000.1.p                | G.max Wm82.a4.v1     | 4.06E-22 | 31 | 229 | AtTET10 AT1G63260 |
| Lj4g0018138.1                      | L.japonicus Lj1.0v1  | 1.14E-21 | 32 | 139 | AtTET10 AT1G63260 |
| arahy.Tifrunner.gnm1.ann1.A2QH6A.1 | A.hypogaea v1.0      | 1.19E-21 | 34 | 232 | AtTET10 AT1G63260 |
| Glyma.04G144500.1.p                | G.max Wm82.a4.v1     | 1.9E-21  | 27 | 217 | AtTET10 AT1G63260 |
| Phvul.003G180300.1.p               | P.vulgaris v2.1      | 2.13E-21 | 30 | 228 | AtTET10 AT1G63260 |
| Glyma.15G207300.1.p                | G.max Wm82.a4.v1     | 2.2E-21  | 27 | 217 | AtTET10 AT1G63260 |
| arahy.Tifrunner.gnm1.ann1.T23S8A.1 | A.hypogaea v1.0      | 2.54E-21 | 33 | 142 | AtTET10 AT1G63260 |
| arahy.Tifrunner.gnm1.ann1.Z53AND.1 | A.hypogaea v1.0      | 9.64E-21 | 32 | 142 | AtTET10 AT1G63260 |
| Glyma.07G129100.1.p                | G.max Wm82.a4.v1     | 2.58E-20 | 33 | 136 | AtTET10 AT1G63260 |
| arahy.Tifrunner.gnm1.ann1.K1NV0H.1 | A.hypogaea v1.0      | 3.11E-20 | 44 | 86  | AtTET10 AT1G63260 |
| arahy.Tifrunner.gnm1.ann1.QC8A1V.1 | A.hypogaea v1.0      | 6.12E-19 | 30 | 229 | AtTET10 AT1G63260 |
| arahy.Tifrunner.gnm1.ann1.EEBB9D.1 | A.hypogaea v1.0      | 6.12E-19 | 30 | 229 | AtTET10 AT1G63260 |
| Glyma.17G069300.2.p                | G.max Wm82.a4.v1     | 7.82E-19 | 38 | 182 | AtTET10 AT1G63260 |
| Ca_23646                           | C.arietinum v1.0     | 5.7E-18  | 35 | 120 | AtTET10 AT1G63260 |
| arahy.Tifrunner.gnm1.ann1.4R894K.1 | A.hypogaea v1.0      | 6.04E-18 | 32 | 225 | AtTET10 AT1G63260 |
| arahy.Tifrunner.gnm1.ann1.D9WPRA.1 | A.hypogaea v1.0      | 1.15E-16 | 32 | 225 | AtTET10 AT1G63260 |
| Medtr2g056130.1                    | M.truncatula Mt4.0v1 | 3.7E-16  | 31 | 137 | AtTET10 AT1G63260 |
| Lj1g0003076.1                      | L.japonicus Lj1.0v1  | 1.08E-15 | 28 | 126 | AtTET10 AT1G63260 |
| Glyma.17G084000.1.p                | G.max Wm82.a4.v1     | 4.78E-74 | 47 | 267 | AtTET11 AT1G18520 |
| Phvul.003G180300.1.p               | P.vulgaris v2.1      | 5.34E-71 | 46 | 267 | AtTET11 AT1G18520 |
| Lcu.2RBY.7g063730.1                | L.culinaris v1       | 2.85E-70 | 47 | 264 | AtTET11 AT1G18520 |
| arahy.Tifrunner.gnm1.ann1.T23S8A.1 | A.hypogaea v1.0      | 3.21E-70 | 44 | 266 | AtTET11 AT1G18520 |
| Lj4g0018138.1                      | L.japonicus Lj1.0v1  | 3.49E-70 | 47 | 266 | AtTET11 AT1G18520 |
| Glyma.05G016200.1.p                | G.max Wm82.a4.v1     | 1.24E-69 | 46 | 267 | AtTET11 AT1G18520 |
| Ca_06587                           | C.arietinum v1.0     | 3.65E-69 | 47 | 273 | AtTET11 AT1G18520 |
| arahy.Tifrunner.gnm1.ann1.Z53AND.1 | A.hypogaea v1.0      | 5.34E-69 | 44 | 266 | AtTET11 AT1G18520 |
| Medtr4g112570.1                    | M.truncatula Mt4.0v1 | 6.04E-69 | 45 | 271 | AtTET11 AT1G18520 |
| Phvul.003G151800.1.p               | P.vulgaris v2.1      | 2.14E-68 | 44 | 264 | AtTET11 AT1G18520 |
| Glyma.13G091000.1.p                | G.max Wm82.a4.v1     | 3.68E-68 | 45 | 264 | AtTET11 AT1G18520 |
| Lj4g0025241.1                      | L.japonicus Lj1.0v1  | 8.36E-68 | 44 | 264 | AtTET11 AT1G18520 |
| arahy.Tifrunner.gnm1.ann1.9I36N1.1 | A.hypogaea v1.0      | 1E-67    | 44 | 264 | AtTET11 AT1G18520 |
| arahy.Tifrunner.gnm1.ann1.V2Z0GB.1 | A.hypogaea v1.0      | 1E-67    | 44 | 264 | AtTET11 AT1G18520 |
| Glyma.17G069300.1.p                | G.max Wm82.a4.v1     | 4.64E-67 | 45 | 264 | AtTET11 AT1G18520 |

|                                    |                      |          |    |     |                   |
|------------------------------------|----------------------|----------|----|-----|-------------------|
| Lcu.2RBY.7g075810.1                | L.culinaris v1       | 1.19E-64 | 42 | 264 | AtTET11 AT1G18520 |
| Medtr4g129670.1                    | M.truncatula Mt4.0v1 | 1.02E-63 | 42 | 262 | AtTET11 AT1G18520 |
| Lj6g0020177.1                      | L.japonicus Lj1.0v1  | 1.32E-62 | 43 | 264 | AtTET11 AT1G18520 |
| arahy.Tifrunner.gnm1.ann1.LZE6LN.1 | A.hypogaea v1.0      | 1.18E-60 | 40 | 263 | AtTET11 AT1G18520 |
| Glyma.04G147100.1.p                | G.max Wm82.a4.v1     | 7.57E-60 | 42 | 261 | AtTET11 AT1G18520 |
| Lcu.2RBY.7g030120.1                | L.culinaris v1       | 1.04E-58 | 39 | 262 | AtTET11 AT1G18520 |
| Glyma.12G072100.1.p                | G.max Wm82.a4.v1     | 1.11E-58 | 41 | 267 | AtTET11 AT1G18520 |
| Medtr2g056130.1                    | M.truncatula Mt4.0v1 | 2.02E-58 | 43 | 268 | AtTET11 AT1G18520 |
| Phvul.009G207500.1.p               | P.vulgaris v2.1      | 6.07E-58 | 42 | 269 | AtTET11 AT1G18520 |
| Ca_03295                           | C.arietinum v1.0     | 2.58E-57 | 44 | 232 | AtTET11 AT1G18520 |
| Glyma.04G144500.1.p                | G.max Wm82.a4.v1     | 3.46E-57 | 43 | 265 | AtTET11 AT1G18520 |
| Phvul.011G072100.1.p               | P.vulgaris v2.1      | 3.73E-57 | 38 | 265 | AtTET11 AT1G18520 |
| Glyma.11G152124.1.p                | G.max Wm82.a4.v1     | 1.52E-56 | 40 | 265 | AtTET11 AT1G18520 |
| Glyma.15G207300.1.p                | G.max Wm82.a4.v1     | 2.42E-56 | 43 | 265 | AtTET11 AT1G18520 |
| Lj2g0015394.1                      | L.japonicus Lj1.0v1  | 2.61E-56 | 38 | 263 | AtTET11 AT1G18520 |
| Lj5g0000955.1                      | L.japonicus Lj1.0v1  | 5.12E-56 | 40 | 267 | AtTET11 AT1G18520 |
| Glyma.10G212400.1.p                | G.max Wm82.a4.v1     | 5.23E-56 | 40 | 267 | AtTET11 AT1G18520 |
| Medtr4g061010.1                    | M.truncatula Mt4.0v1 | 1.51E-55 | 38 | 236 | AtTET11 AT1G18520 |
| Glyma.01G095700.1.p                | G.max Wm82.a4.v1     | 2.58E-55 | 40 | 262 | AtTET11 AT1G18520 |
| Ca_14606                           | C.arietinum v1.0     | 1.86E-54 | 38 | 267 | AtTET11 AT1G18520 |
| arahy.Tifrunner.gnm1.ann1.JZ8XUN.1 | A.hypogaea v1.0      | 2.57E-54 | 38 | 265 | AtTET11 AT1G18520 |
| arahy.Tifrunner.gnm1.ann1.AUDB51.1 | A.hypogaea v1.0      | 2.78E-54 | 38 | 265 | AtTET11 AT1G18520 |
| Glyma.16G145400.1.p                | G.max Wm82.a4.v1     | 3.15E-54 | 39 | 267 | AtTET11 AT1G18520 |
| Ca_08501                           | C.arietinum v1.0     | 3.83E-54 | 39 | 267 | AtTET11 AT1G18520 |
| Medtr8g066790.1                    | M.truncatula Mt4.0v1 | 4.27E-54 | 40 | 264 | AtTET11 AT1G18520 |
| Lcu.2RBY.4g032690.1                | L.culinaris v1       | 4.61E-54 | 38 | 265 | AtTET11 AT1G18520 |
| Glyma.13G328700.1.p                | G.max Wm82.a4.v1     | 5.09E-54 | 37 | 266 | AtTET11 AT1G18520 |
| Phvul.007G093400.1.p               | P.vulgaris v2.1      | 6.02E-54 | 38 | 267 | AtTET11 AT1G18520 |
| Lj2g0026181.1                      | L.japonicus Lj1.0v1  | 6.27E-54 | 38 | 267 | AtTET11 AT1G18520 |
| Lj1g0003076.1                      | L.japonicus Lj1.0v1  | 6.31E-54 | 42 | 272 | AtTET11 AT1G18520 |
| Glyma.20G178700.1.p                | G.max Wm82.a4.v1     | 2.12E-53 | 38 | 267 | AtTET11 AT1G18520 |
| Lj3g0001285.1                      | L.japonicus Lj1.0v1  | 2.24E-53 | 38 | 268 | AtTET11 AT1G18520 |
| Glyma.02G063700.1.p                | G.max Wm82.a4.v1     | 2.69E-53 | 39 | 267 | AtTET11 AT1G18520 |
| arahy.Tifrunner.gnm1.ann1.Z4U2NE.1 | A.hypogaea v1.0      | 3.9E-53  | 39 | 267 | AtTET11 AT1G18520 |
| Lcu.2RBY.1g046720.1                | L.culinaris v1       | 1.46E-52 | 39 | 267 | AtTET11 AT1G18520 |
| Phvul.003G284700.1.p               | P.vulgaris v2.1      | 1.67E-52 | 38 | 262 | AtTET11 AT1G18520 |
| Ca_25832                           | C.arietinum v1.0     | 2.62E-52 | 41 | 265 | AtTET11 AT1G18520 |

|                                    |                      |          |    |     |                   |
|------------------------------------|----------------------|----------|----|-----|-------------------|
| Glyma.09G205400.1.p                | G.max Wm82.a4.v1     | 2.96E-52 | 38 | 262 | AtTET11 AT1G18520 |
| Phvul.004G071900.1.p               | P.vulgaris v2.1      | 3.65E-52 | 37 | 267 | AtTET11 AT1G18520 |
| Medtr6g033335.1                    | M.truncatula Mt4.0v1 | 6.45E-52 | 37 | 271 | AtTET11 AT1G18520 |
| arahy.Tifrunner.gnm1.ann1.Z77BB1.1 | A.hypogaea v1.0      | 7.01E-52 | 38 | 268 | AtTET11 AT1G18520 |
| Lcu.2RBY.5g015480.1                | L.culinaris v1       | 7.48E-52 | 38 | 262 | AtTET11 AT1G18520 |
| Lj4g0026647.1                      | L.japonicus Lj1.0v1  | 4.72E-51 | 38 | 262 | AtTET11 AT1G18520 |
| Lcu.2RBY.2g064540.1                | L.culinaris v1       | 5.3E-51  | 41 | 266 | AtTET11 AT1G18520 |
| Phvul.005G137500.1.p               | P.vulgaris v2.1      | 7.57E-51 | 38 | 240 | AtTET11 AT1G18520 |
| Ca_11504                           | C.arietinum v1.0     | 2.04E-50 | 38 | 262 | AtTET11 AT1G18520 |
| Lcu.2RBY.2g046220.1                | L.culinaris v1       | 2.93E-50 | 37 | 267 | AtTET11 AT1G18520 |
| Medtr1g095530.1                    | M.truncatula Mt4.0v1 | 3.93E-50 | 40 | 267 | AtTET11 AT1G18520 |
| arahy.Tifrunner.gnm1.ann1.8QTZ72.1 | A.hypogaea v1.0      | 6.03E-49 | 34 | 263 | AtTET11 AT1G18520 |
| arahy.Tifrunner.gnm1.ann1.B859HK.1 | A.hypogaea v1.0      | 7.48E-49 | 37 | 264 | AtTET11 AT1G18520 |
| arahy.Tifrunner.gnm1.ann1.PNW690.1 | A.hypogaea v1.0      | 8.02E-49 | 38 | 233 | AtTET11 AT1G18520 |
| Glyma.05G205600.1.p                | G.max Wm82.a4.v1     | 2.73E-48 | 33 | 258 | AtTET11 AT1G18520 |
| Ca_05887                           | C.arietinum v1.0     | 3.72E-48 | 38 | 262 | AtTET11 AT1G18520 |
| Phvul.009G191200.1.p               | P.vulgaris v2.1      | 1.82E-47 | 38 | 265 | AtTET11 AT1G18520 |
| Medtr8g101600.1                    | M.truncatula Mt4.0v1 | 2.01E-47 | 37 | 262 | AtTET11 AT1G18520 |
| Lcu.2RBY.4g075230.1                | L.culinaris v1       | 3.89E-47 | 33 | 258 | AtTET11 AT1G18520 |
| Phvul.002G287500.1.p               | P.vulgaris v2.1      | 1.31E-46 | 33 | 258 | AtTET11 AT1G18520 |
| Glyma.08G012500.2.p                | G.max Wm82.a4.v1     | 1.93E-46 | 33 | 258 | AtTET11 AT1G18520 |
| arahy.Tifrunner.gnm1.ann1.0ZGE19.1 | A.hypogaea v1.0      | 3.8E-46  | 34 | 263 | AtTET11 AT1G18520 |
| Medtr5g030070.1                    | M.truncatula Mt4.0v1 | 7.69E-45 | 38 | 262 | AtTET11 AT1G18520 |
| Phvul.002G140500.1.p               | P.vulgaris v2.1      | 1.16E-44 | 35 | 261 | AtTET11 AT1G18520 |
| arahy.Tifrunner.gnm1.ann1.A2QH6A.1 | A.hypogaea v1.0      | 2.34E-44 | 34 | 263 | AtTET11 AT1G18520 |
| Lj4g0027264.1                      | L.japonicus Lj1.0v1  | 5.07E-44 | 37 | 267 | AtTET11 AT1G18520 |
| arahy.Tifrunner.gnm1.ann1.XJXR2L.1 | A.hypogaea v1.0      | 7.88E-44 | 31 | 267 | AtTET11 AT1G18520 |
| Lcu.2RBY.4g078330.1                | L.culinaris v1       | 1.53E-43 | 36 | 262 | AtTET11 AT1G18520 |
| arahy.Tifrunner.gnm1.ann1.N28W6S.1 | A.hypogaea v1.0      | 1.62E-43 | 35 | 265 | AtTET11 AT1G18520 |
| arahy.Tifrunner.gnm1.ann1.EM0Y56.1 | A.hypogaea v1.0      | 1.95E-43 | 35 | 265 | AtTET11 AT1G18520 |
| arahy.Tifrunner.gnm1.ann1.2A0H1U.1 | A.hypogaea v1.0      | 3.69E-43 | 31 | 267 | AtTET11 AT1G18520 |
| arahy.Tifrunner.gnm1.ann1.4R894K.1 | A.hypogaea v1.0      | 8.2E-43  | 34 | 267 | AtTET11 AT1G18520 |
| Lj4g0013226.1                      | L.japonicus Lj1.0v1  | 1.85E-42 | 33 | 258 | AtTET11 AT1G18520 |
| Medtr8g097280.1                    | M.truncatula Mt4.0v1 | 1.99E-42 | 31 | 232 | AtTET11 AT1G18520 |
| Glyma.08G029100.1.p                | G.max Wm82.a4.v1     | 1.1E-41  | 37 | 267 | AtTET11 AT1G18520 |
| Phvul.002G304100.1.p               | P.vulgaris v2.1      | 1.3E-40  | 37 | 262 | AtTET11 AT1G18520 |
| arahy.Tifrunner.gnm1.ann1.D9WPRA.1 | A.hypogaea v1.0      | 1.22E-39 | 34 | 267 | AtTET11 AT1G18520 |

|                                    |                      |          |    |     |                   |
|------------------------------------|----------------------|----------|----|-----|-------------------|
| Phvul.004G171300.1.p               | P.vulgaris v2.1      | 3.15E-37 | 36 | 262 | AtTET11 AT1G18520 |
| arahy.Tifrunner.gnm1.ann1.QC8A1V.1 | A.hypogaea v1.0      | 1.42E-36 | 31 | 261 | AtTET11 AT1G18520 |
| arahy.Tifrunner.gnm1.ann1.EEBB9D.1 | A.hypogaea v1.0      | 1.42E-36 | 31 | 261 | AtTET11 AT1G18520 |
| Lj2g0020248.1                      | L.japonicus Lj1.0v1  | 5.2E-36  | 34 | 231 | AtTET11 AT1G18520 |
| Glyma.07G129100.1.p                | G.max Wm82.a4.v1     | 9.85E-36 | 35 | 266 | AtTET11 AT1G18520 |
| Glyma.17G069300.2.p                | G.max Wm82.a4.v1     | 3.4E-33  | 41 | 170 | AtTET11 AT1G18520 |
| Ca_05724                           | C.arietinum v1.0     | 1.32E-30 | 29 | 258 | AtTET11 AT1G18520 |
| arahy.Tifrunner.gnm1.ann1.H32RIC.1 | A.hypogaea v1.0      | 8.13E-29 | 36 | 179 | AtTET11 AT1G18520 |
| Ca_23646                           | C.arietinum v1.0     | 1E-25    | 40 | 156 | AtTET11 AT1G18520 |
| arahy.Tifrunner.gnm1.ann1.K1NV0H.1 | A.hypogaea v1.0      | 2.61E-24 | 48 | 81  | AtTET11 AT1G18520 |
| Lcu.2RBY.7g063730.1                | L.culinaris v1       | 2.1E-40  | 40 | 260 | AtTET12 AT5G23030 |
| Medtr4g112570.1                    | M.truncatula Mt4.0v1 | 3.24E-40 | 40 | 260 | AtTET12 AT5G23030 |
| Phvul.003G180300.1.p               | P.vulgaris v2.1      | 2.98E-39 | 41 | 260 | AtTET12 AT5G23030 |
| Ca_06587                           | C.arietinum v1.0     | 3.28E-39 | 40 | 260 | AtTET12 AT5G23030 |
| Glyma.17G084000.1.p                | G.max Wm82.a4.v1     | 9.77E-39 | 38 | 261 | AtTET12 AT5G23030 |
| Lj4g0018138.1                      | L.japonicus Lj1.0v1  | 1.8E-38  | 39 | 266 | AtTET12 AT5G23030 |
| arahy.Tifrunner.gnm1.ann1.T23S8A.1 | A.hypogaea v1.0      | 4.03E-35 | 35 | 271 | AtTET12 AT5G23030 |
| arahy.Tifrunner.gnm1.ann1.Z53AND.1 | A.hypogaea v1.0      | 8.1E-35  | 36 | 266 | AtTET12 AT5G23030 |
| Glyma.05G016200.1.p                | G.max Wm82.a4.v1     | 9.22E-35 | 39 | 261 | AtTET12 AT5G23030 |
| Glyma.17G069300.1.p                | G.max Wm82.a4.v1     | 7.06E-34 | 36 | 261 | AtTET12 AT5G23030 |
| Lcu.2RBY.7g075810.1                | L.culinaris v1       | 1.24E-33 | 36 | 267 | AtTET12 AT5G23030 |
| Phvul.003G151800.1.p               | P.vulgaris v2.1      | 9.79E-33 | 36 | 267 | AtTET12 AT5G23030 |
| Glyma.13G091000.1.p                | G.max Wm82.a4.v1     | 1.18E-31 | 35 | 261 | AtTET12 AT5G23030 |
| Lj6g0020177.1                      | L.japonicus Lj1.0v1  | 6.71E-30 | 34 | 267 | AtTET12 AT5G23030 |
| Medtr4g129670.1                    | M.truncatula Mt4.0v1 | 9.7E-30  | 34 | 266 | AtTET12 AT5G23030 |
| arahy.Tifrunner.gnm1.ann1.9I36N1.1 | A.hypogaea v1.0      | 1.88E-29 | 35 | 261 | AtTET12 AT5G23030 |
| arahy.Tifrunner.gnm1.ann1.V2Z0GB.1 | A.hypogaea v1.0      | 1.88E-29 | 35 | 261 | AtTET12 AT5G23030 |
| Medtr2g056130.1                    | M.truncatula Mt4.0v1 | 3.06E-29 | 35 | 256 | AtTET12 AT5G23030 |
| Lj4g0025241.1                      | L.japonicus Lj1.0v1  | 4.19E-29 | 34 | 269 | AtTET12 AT5G23030 |
| Glyma.04G144500.1.p                | G.max Wm82.a4.v1     | 5.99E-29 | 34 | 264 | AtTET12 AT5G23030 |
| Glyma.15G207300.1.p                | G.max Wm82.a4.v1     | 9.6E-29  | 34 | 264 | AtTET12 AT5G23030 |
| Ca_03295                           | C.arietinum v1.0     | 3.71E-28 | 36 | 240 | AtTET12 AT5G23030 |
| Glyma.04G147100.1.p                | G.max Wm82.a4.v1     | 6.53E-28 | 33 | 264 | AtTET12 AT5G23030 |
| Lj1g0003076.1                      | L.japonicus Lj1.0v1  | 1.66E-27 | 34 | 268 | AtTET12 AT5G23030 |
| Phvul.009G191200.1.p               | P.vulgaris v2.1      | 3.98E-27 | 33 | 261 | AtTET12 AT5G23030 |
| arahy.Tifrunner.gnm1.ann1.A2QH6A.1 | A.hypogaea v1.0      | 5.13E-27 | 37 | 259 | AtTET12 AT5G23030 |
| Ca_25832                           | C.arietinum v1.0     | 7.41E-27 | 35 | 224 | AtTET12 AT5G23030 |

|                                    |                      |          |    |     |                   |
|------------------------------------|----------------------|----------|----|-----|-------------------|
| arahy.Tifrunner.gnm1.ann1.8QTZ72.1 | A.hypogaea v1.0      | 1.99E-26 | 35 | 260 | AtTET12 AT5G23030 |
| arahy.Tifrunner.gnm1.ann1.LZE6LN.1 | A.hypogaea v1.0      | 4.16E-26 | 34 | 227 | AtTET12 AT5G23030 |
| Phvul.005G137500.1.p               | P.vulgaris v2.1      | 9.37E-26 | 34 | 203 | AtTET12 AT5G23030 |
| Ca_14606                           | C.arietinum v1.0     | 2.44E-25 | 36 | 200 | AtTET12 AT5G23030 |
| Phvul.009G207500.1.p               | P.vulgaris v2.1      | 2.62E-25 | 34 | 260 | AtTET12 AT5G23030 |
| arahy.Tifrunner.gnm1.ann1.AUDB51.1 | A.hypogaea v1.0      | 2.76E-25 | 38 | 201 | AtTET12 AT5G23030 |
| Lcu.2RBY.4g032690.1                | L.culinaris v1       | 6.2E-25  | 35 | 200 | AtTET12 AT5G23030 |
| Glyma.12G072100.1.p                | G.max Wm82.a4.v1     | 1.15E-24 | 36 | 200 | AtTET12 AT5G23030 |
| arahy.Tifrunner.gnm1.ann1.JZ8XUN.1 | A.hypogaea v1.0      | 1.35E-24 | 37 | 201 | AtTET12 AT5G23030 |
| Phvul.011G072100.1.p               | P.vulgaris v2.1      | 1.35E-24 | 33 | 228 | AtTET12 AT5G23030 |
| Lcu.2RBY.7g030120.1                | L.culinaris v1       | 1.84E-24 | 30 | 260 | AtTET12 AT5G23030 |
| Glyma.11G152124.1.p                | G.max Wm82.a4.v1     | 4.9E-24  | 35 | 203 | AtTET12 AT5G23030 |
| Glyma.13G328700.1.p                | G.max Wm82.a4.v1     | 4.31E-23 | 35 | 228 | AtTET12 AT5G23030 |
| Medtr1g095530.1                    | M.truncatula Mt4.0v1 | 9.4E-23  | 32 | 222 | AtTET12 AT5G23030 |
| Glyma.01G095700.1.p                | G.max Wm82.a4.v1     | 1.89E-22 | 29 | 258 | AtTET12 AT5G23030 |
| Medtr4g061010.1                    | M.truncatula Mt4.0v1 | 2.19E-22 | 33 | 203 | AtTET12 AT5G23030 |
| Lj5g0000955.1                      | L.japonicus Lj1.0v1  | 2.27E-22 | 31 | 222 | AtTET12 AT5G23030 |
| Lj3g0001285.1                      | L.japonicus Lj1.0v1  | 2.76E-22 | 35 | 202 | AtTET12 AT5G23030 |
| arahy.Tifrunner.gnm1.ann1.PNW690.1 | A.hypogaea v1.0      | 4.12E-22 | 33 | 204 | AtTET12 AT5G23030 |
| Glyma.10G212400.1.p                | G.max Wm82.a4.v1     | 4.21E-22 | 28 | 257 | AtTET12 AT5G23030 |
| Glyma.20G178700.1.p                | G.max Wm82.a4.v1     | 4.91E-22 | 29 | 257 | AtTET12 AT5G23030 |
| Phvul.007G093400.1.p               | P.vulgaris v2.1      | 5.12E-22 | 29 | 257 | AtTET12 AT5G23030 |
| arahy.Tifrunner.gnm1.ann1.N28W6S.1 | A.hypogaea v1.0      | 7.28E-22 | 31 | 230 | AtTET12 AT5G23030 |
| arahy.Tifrunner.gnm1.ann1.EM0Y56.1 | A.hypogaea v1.0      | 7.51E-22 | 31 | 230 | AtTET12 AT5G23030 |
| Lcu.2RBY.1g046720.1                | L.culinaris v1       | 8.72E-22 | 29 | 257 | AtTET12 AT5G23030 |
| Ca_05887                           | C.arietinum v1.0     | 1.04E-21 | 31 | 256 | AtTET12 AT5G23030 |
| Phvul.003G284700.1.p               | P.vulgaris v2.1      | 1.11E-21 | 28 | 258 | AtTET12 AT5G23030 |
| Phvul.004G071900.1.p               | P.vulgaris v2.1      | 1.82E-21 | 31 | 222 | AtTET12 AT5G23030 |
| Ca_08501                           | C.arietinum v1.0     | 1.98E-21 | 28 | 257 | AtTET12 AT5G23030 |
| Medtr6g033335.1                    | M.truncatula Mt4.0v1 | 2.38E-21 | 28 | 257 | AtTET12 AT5G23030 |
| Lj2g0026181.1                      | L.japonicus Lj1.0v1  | 5.89E-21 | 30 | 222 | AtTET12 AT5G23030 |
| arahy.Tifrunner.gnm1.ann1.B859HK.1 | A.hypogaea v1.0      | 1.22E-20 | 32 | 204 | AtTET12 AT5G23030 |
| arahy.Tifrunner.gnm1.ann1.2A0H1U.1 | A.hypogaea v1.0      | 1.71E-20 | 32 | 220 | AtTET12 AT5G23030 |
| Medtr8g066790.1                    | M.truncatula Mt4.0v1 | 1.88E-20 | 34 | 165 | AtTET12 AT5G23030 |
| Glyma.16G145400.1.p                | G.max Wm82.a4.v1     | 2.03E-20 | 30 | 220 | AtTET12 AT5G23030 |
| Glyma.08G029100.1.p                | G.max Wm82.a4.v1     | 2.67E-20 | 32 | 159 | AtTET12 AT5G23030 |
| arahy.Tifrunner.gnm1.ann1.XJXR2L.1 | A.hypogaea v1.0      | 2.91E-20 | 32 | 220 | AtTET12 AT5G23030 |

|                                    |                      |          |    |     |                   |
|------------------------------------|----------------------|----------|----|-----|-------------------|
| Medtr8g101600.1                    | M.truncatula Mt4.0v1 | 3.14E-20 | 32 | 222 | AtTET12 AT5G23030 |
| Lj4g0026647.1                      | L.japonicus Lj1.0v1  | 9.18E-20 | 31 | 230 | AtTET12 AT5G23030 |
| Lj2g0015394.1                      | L.japonicus Lj1.0v1  | 9.46E-20 | 29 | 226 | AtTET12 AT5G23030 |
| Lj4g0013226.1                      | L.japonicus Lj1.0v1  | 1.08E-19 | 31 | 221 | AtTET12 AT5G23030 |
| Phvul.002G287500.1.p               | P.vulgaris v2.1      | 1.15E-19 | 31 | 221 | AtTET12 AT5G23030 |
| Glyma.07G129100.1.p                | G.max Wm82.a4.v1     | 1.9E-19  | 32 | 163 | AtTET12 AT5G23030 |
| arahy.Tifrunner.gnm1.ann1.Z4U2NE.1 | A.hypogaea v1.0      | 2.03E-19 | 28 | 257 | AtTET12 AT5G23030 |
| Lcu.2RBY.2g064540.1                | L.culinaris v1       | 2.22E-19 | 29 | 259 | AtTET12 AT5G23030 |
| Phvul.004G171300.1.p               | P.vulgaris v2.1      | 2.27E-19 | 31 | 159 | AtTET12 AT5G23030 |
| Glyma.09G205400.1.p                | G.max Wm82.a4.v1     | 2.67E-19 | 30 | 224 | AtTET12 AT5G23030 |
| Lcu.2RBY.4g078330.1                | L.culinaris v1       | 3.31E-19 | 30 | 256 | AtTET12 AT5G23030 |
| Lcu.2RBY.2g046220.1                | L.culinaris v1       | 3.35E-19 | 28 | 225 | AtTET12 AT5G23030 |
| Glyma.05G205600.1.p                | G.max Wm82.a4.v1     | 3.75E-19 | 31 | 220 | AtTET12 AT5G23030 |
| Lj4g0027264.1                      | L.japonicus Lj1.0v1  | 5.13E-19 | 33 | 159 | AtTET12 AT5G23030 |
| arahy.Tifrunner.gnm1.ann1.Z77BB1.1 | A.hypogaea v1.0      | 6.32E-19 | 29 | 222 | AtTET12 AT5G23030 |
| arahy.Tifrunner.gnm1.ann1.OZGE19.1 | A.hypogaea v1.0      | 6.68E-19 | 31 | 224 | AtTET12 AT5G23030 |
| Glyma.02G063700.1.p                | G.max Wm82.a4.v1     | 1.04E-18 | 30 | 222 | AtTET12 AT5G23030 |
| Glyma.08G012500.2.p                | G.max Wm82.a4.v1     | 1.76E-18 | 30 | 220 | AtTET12 AT5G23030 |
| Phvul.002G304100.1.p               | P.vulgaris v2.1      | 4.72E-18 | 33 | 159 | AtTET12 AT5G23030 |
| Lj2g0020248.1                      | L.japonicus Lj1.0v1  | 8.55E-18 | 35 | 130 | AtTET12 AT5G23030 |
| Ca_11504                           | C.arietinum v1.0     | 9.88E-18 | 28 | 230 | AtTET12 AT5G23030 |
| Lcu.2RBY.5g015480.1                | L.culinaris v1       | 1.14E-17 | 28 | 230 | AtTET12 AT5G23030 |
| Phvul.002G140500.1.p               | P.vulgaris v2.1      | 1.52E-17 | 27 | 255 | AtTET12 AT5G23030 |
| arahy.Tifrunner.gnm1.ann1.H32RIC.1 | A.hypogaea v1.0      | 4.22E-17 | 31 | 160 | AtTET12 AT5G23030 |
| Lcu.2RBY.4g075230.1                | L.culinaris v1       | 8.78E-17 | 30 | 220 | AtTET12 AT5G23030 |
| Medtr8g097280.1                    | M.truncatula Mt4.0v1 | 1.76E-16 | 29 | 197 | AtTET12 AT5G23030 |
| Ca_23646                           | C.arietinum v1.0     | 3.17E-16 | 31 | 143 | AtTET12 AT5G23030 |
| arahy.Tifrunner.gnm1.ann1.K1NV0H.1 | A.hypogaea v1.0      | 4.9E-16  | 51 | 75  | AtTET12 AT5G23030 |
| Ca_05724                           | C.arietinum v1.0     | 2.2E-15  | 29 | 160 | AtTET12 AT5G23030 |
| arahy.Tifrunner.gnm1.ann1.8RU08H.1 | A.hypogaea v1.0      | 3.07E-14 | 30 | 157 | AtTET12 AT5G23030 |
| Medtr5g030070.1                    | M.truncatula Mt4.0v1 | 5.64E-14 | 32 | 130 | AtTET12 AT5G23030 |
| arahy.Tifrunner.gnm1.ann1.4R894K.1 | A.hypogaea v1.0      | 4.05E-13 | 27 | 257 | AtTET12 AT5G23030 |
| Glyma.17G069300.2.p                | G.max Wm82.a4.v1     | 6.18E-12 | 32 | 169 | AtTET12 AT5G23030 |
| arahy.Tifrunner.gnm1.ann1.D9WPRA.1 | A.hypogaea v1.0      | 1.66E-11 | 27 | 257 | AtTET12 AT5G23030 |
| arahy.Tifrunner.gnm1.ann1.QC8A1V.1 | A.hypogaea v1.0      | 6.73E-11 | 42 | 89  | AtTET12 AT5G23030 |
| arahy.Tifrunner.gnm1.ann1.LZE6LN.1 | A.hypogaea v1.0      | 1.36E-38 | 29 | 245 | AtTET13 AT2G03840 |
| Phvul.011G072100.1.p               | P.vulgaris v2.1      | 2.71E-38 | 31 | 222 | AtTET13 AT2G03840 |



|                                    |                      |          |    |     |                   |
|------------------------------------|----------------------|----------|----|-----|-------------------|
| Glyma.12G072100.1.p                | G.max Wm82.a4.v1     | 3.08E-37 | 32 | 223 | AtTET13 AT2G03840 |
| Glyma.11G152124.1.p                | G.max Wm82.a4.v1     | 1.89E-36 | 32 | 223 | AtTET13 AT2G03840 |
| arahy.Tifrunner.gnm1.ann1.JZ8XUN.1 | A.hypogaea v1.0      | 6.79E-36 | 30 | 223 | AtTET13 AT2G03840 |
| arahy.Tifrunner.gnm1.ann1.AUDB51.1 | A.hypogaea v1.0      | 9.84E-36 | 30 | 223 | AtTET13 AT2G03840 |
| Glyma.04G147100.1.p                | G.max Wm82.a4.v1     | 1.38E-35 | 29 | 242 | AtTET13 AT2G03840 |
| Lj2g0015394.1                      | L.japonicus Lj1.0v1  | 5.21E-35 | 28 | 246 | AtTET13 AT2G03840 |
| Phvul.003G151800.1.p               | P.vulgaris v2.1      | 5.23E-35 | 30 | 251 | AtTET13 AT2G03840 |
| Medtr4g061010.1                    | M.truncatula Mt4.0v1 | 3.54E-34 | 30 | 223 | AtTET13 AT2G03840 |
| Glyma.10G212400.1.p                | G.max Wm82.a4.v1     | 3.96E-34 | 28 | 243 | AtTET13 AT2G03840 |
| Ca_14606                           | C.arietinum v1.0     | 4.1E-34  | 30 | 223 | AtTET13 AT2G03840 |
| Lcu.2RBY.4g032690.1                | L.culinaris v1       | 4.66E-34 | 30 | 223 | AtTET13 AT2G03840 |
| Ca_08501                           | C.arietinum v1.0     | 5E-34    | 30 | 244 | AtTET13 AT2G03840 |
| Lj5g0000955.1                      | L.japonicus Lj1.0v1  | 8.47E-34 | 28 | 247 | AtTET13 AT2G03840 |
| Lj6g0020177.1                      | L.japonicus Lj1.0v1  | 9.9E-34  | 31 | 208 | AtTET13 AT2G03840 |
| Phvul.005G137500.1.p               | P.vulgaris v2.1      | 1.48E-33 | 29 | 223 | AtTET13 AT2G03840 |
| Glyma.20G178700.1.p                | G.max Wm82.a4.v1     | 2.16E-33 | 28 | 243 | AtTET13 AT2G03840 |
| Glyma.09G205400.1.p                | G.max Wm82.a4.v1     | 3.06E-33 | 30 | 225 | AtTET13 AT2G03840 |
| Lcu.2RBY.7g075810.1                | L.culinaris v1       | 4.45E-33 | 29 | 241 | AtTET13 AT2G03840 |
| arahy.Tifrunner.gnm1.ann1.Z4U2NE.1 | A.hypogaea v1.0      | 7.89E-33 | 30 | 227 | AtTET13 AT2G03840 |
| Glyma.13G091000.1.p                | G.max Wm82.a4.v1     | 9E-33    | 29 | 265 | AtTET13 AT2G03840 |
| Glyma.13G328700.1.p                | G.max Wm82.a4.v1     | 9.86E-33 | 29 | 246 | AtTET13 AT2G03840 |
| Lj3g0001285.1                      | L.japonicus Lj1.0v1  | 1.15E-32 | 29 | 224 | AtTET13 AT2G03840 |
| Lcu.2RBY.5g015480.1                | L.culinaris v1       | 2.02E-32 | 30 | 221 | AtTET13 AT2G03840 |
| arahy.Tifrunner.gnm1.ann1.Z77BB1.1 | A.hypogaea v1.0      | 2.71E-32 | 30 | 226 | AtTET13 AT2G03840 |
| Medtr6g033335.1                    | M.truncatula Mt4.0v1 | 4.89E-32 | 28 | 224 | AtTET13 AT2G03840 |
| Ca_11504                           | C.arietinum v1.0     | 4.9E-32  | 31 | 212 | AtTET13 AT2G03840 |
| Lj4g0025241.1                      | L.japonicus Lj1.0v1  | 1.7E-31  | 30 | 223 | AtTET13 AT2G03840 |
| Lj2g0026181.1                      | L.japonicus Lj1.0v1  | 1.89E-31 | 29 | 237 | AtTET13 AT2G03840 |
| Glyma.02G063700.1.p                | G.max Wm82.a4.v1     | 2.98E-31 | 30 | 233 | AtTET13 AT2G03840 |
| Medtr4g129670.1                    | M.truncatula Mt4.0v1 | 2.98E-31 | 31 | 233 | AtTET13 AT2G03840 |
| Ca_05887                           | C.arietinum v1.0     | 4.42E-31 | 27 | 230 | AtTET13 AT2G03840 |
| Phvul.007G093400.1.p               | P.vulgaris v2.1      | 5.65E-31 | 26 | 243 | AtTET13 AT2G03840 |
| Phvul.003G284700.1.p               | P.vulgaris v2.1      | 7.41E-31 | 28 | 225 | AtTET13 AT2G03840 |
| Glyma.01G095700.1.p                | G.max Wm82.a4.v1     | 9.84E-31 | 29 | 225 | AtTET13 AT2G03840 |
| Medtr8g066790.1                    | M.truncatula Mt4.0v1 | 2.1E-30  | 28 | 225 | AtTET13 AT2G03840 |
| Lcu.2RBY.7g030120.1                | L.culinaris v1       | 3.77E-30 | 27 | 245 | AtTET13 AT2G03840 |
| Glyma.16G145400.1.p                | G.max Wm82.a4.v1     | 6.29E-30 | 30 | 232 | AtTET13 AT2G03840 |

|                                    |                      |          |    |     |                   |
|------------------------------------|----------------------|----------|----|-----|-------------------|
| Lcu.2RBY.1g046720.1                | L.culinaris v1       | 6.43E-30 | 27 | 243 | AtTET13 AT2G03840 |
| arahy.Tifrunner.gnm1.ann1.N28W6S.1 | A.hypogaea v1.0      | 7.88E-30 | 28 | 230 | AtTET13 AT2G03840 |
| Lj4g0026647.1                      | L.japonicus Lj1.0v1  | 7.95E-30 | 29 | 225 | AtTET13 AT2G03840 |
| Lcu.2RBY.4g078330.1                | L.culinaris v1       | 9.41E-30 | 29 | 231 | AtTET13 AT2G03840 |
| arahy.Tifrunner.gnm1.ann1.EM0Y56.1 | A.hypogaea v1.0      | 9.71E-30 | 28 | 230 | AtTET13 AT2G03840 |
| arahy.Tifrunner.gnm1.ann1.B859HK.1 | A.hypogaea v1.0      | 1.41E-29 | 27 | 231 | AtTET13 AT2G03840 |
| arahy.Tifrunner.gnm1.ann1.PNW690.1 | A.hypogaea v1.0      | 2.09E-29 | 27 | 231 | AtTET13 AT2G03840 |
| arahy.Tifrunner.gnm1.ann1.9I36N1.1 | A.hypogaea v1.0      | 2.52E-29 | 27 | 239 | AtTET13 AT2G03840 |
| arahy.Tifrunner.gnm1.ann1.V2Z0GB.1 | A.hypogaea v1.0      | 2.52E-29 | 27 | 239 | AtTET13 AT2G03840 |
| Medtr1g095530.1                    | M.truncatula Mt4.0v1 | 4.54E-29 | 28 | 229 | AtTET13 AT2G03840 |
| Glyma.17G069300.1.p                | G.max Wm82.a4.v1     | 5.2E-29  | 28 | 268 | AtTET13 AT2G03840 |
| Phvul.009G207500.1.p               | P.vulgaris v2.1      | 5.94E-29 | 28 | 259 | AtTET13 AT2G03840 |
| Lcu.2RBY.2g046220.1                | L.culinaris v1       | 1.25E-28 | 29 | 225 | AtTET13 AT2G03840 |
| arahy.Tifrunner.gnm1.ann1.8QTZ72.1 | A.hypogaea v1.0      | 1.48E-28 | 30 | 217 | AtTET13 AT2G03840 |
| Phvul.004G071900.1.p               | P.vulgaris v2.1      | 1.66E-28 | 29 | 232 | AtTET13 AT2G03840 |
| Medtr8g101600.1                    | M.truncatula Mt4.0v1 | 1.66E-28 | 27 | 230 | AtTET13 AT2G03840 |
| Phvul.002G140500.1.p               | P.vulgaris v2.1      | 3.38E-28 | 27 | 226 | AtTET13 AT2G03840 |
| arahy.Tifrunner.gnm1.ann1.0ZGE19.1 | A.hypogaea v1.0      | 5.16E-28 | 25 | 244 | AtTET13 AT2G03840 |
| Medtr8g097280.1                    | M.truncatula Mt4.0v1 | 5.85E-28 | 30 | 186 | AtTET13 AT2G03840 |
| arahy.Tifrunner.gnm1.ann1.A2QH6A.1 | A.hypogaea v1.0      | 1.12E-27 | 29 | 216 | AtTET13 AT2G03840 |
| Medtr5g030070.1                    | M.truncatula Mt4.0v1 | 1.47E-27 | 30 | 225 | AtTET13 AT2G03840 |
| Lcu.2RBY.4g075230.1                | L.culinaris v1       | 1.99E-27 | 31 | 188 | AtTET13 AT2G03840 |
| Phvul.002G304100.1.p               | P.vulgaris v2.1      | 1.25E-26 | 27 | 230 | AtTET13 AT2G03840 |
| Phvul.002G287500.1.p               | P.vulgaris v2.1      | 4.14E-26 | 30 | 210 | AtTET13 AT2G03840 |
| Lj4g0027264.1                      | L.japonicus Lj1.0v1  | 4.88E-26 | 27 | 230 | AtTET13 AT2G03840 |
| Ca_03295                           | C.arietinum v1.0     | 1.15E-25 | 31 | 193 | AtTET13 AT2G03840 |
| Glyma.08G029100.1.p                | G.max Wm82.a4.v1     | 1.32E-25 | 28 | 230 | AtTET13 AT2G03840 |
| Ca_06587                           | C.arietinum v1.0     | 1.39E-25 | 27 | 216 | AtTET13 AT2G03840 |
| arahy.Tifrunner.gnm1.ann1.2A0H1U.1 | A.hypogaea v1.0      | 1.46E-25 | 28 | 247 | AtTET13 AT2G03840 |
| Glyma.05G205600.1.p                | G.max Wm82.a4.v1     | 3.24E-25 | 30 | 209 | AtTET13 AT2G03840 |
| Lcu.2RBY.7g063730.1                | L.culinaris v1       | 4.12E-25 | 26 | 209 | AtTET13 AT2G03840 |
| Lj2g0020248.1                      | L.japonicus Lj1.0v1  | 7.38E-25 | 26 | 234 | AtTET13 AT2G03840 |
| Lj4g0018138.1                      | L.japonicus Lj1.0v1  | 1.07E-24 | 29 | 224 | AtTET13 AT2G03840 |
| arahy.Tifrunner.gnm1.ann1.XJXR2L.1 | A.hypogaea v1.0      | 1.93E-24 | 28 | 237 | AtTET13 AT2G03840 |
| Glyma.08G012500.2.p                | G.max Wm82.a4.v1     | 4.24E-24 | 30 | 210 | AtTET13 AT2G03840 |
| Glyma.17G084000.1.p                | G.max Wm82.a4.v1     | 5.18E-24 | 27 | 211 | AtTET13 AT2G03840 |
| Medtr4g112570.1                    | M.truncatula Mt4.0v1 | 9.79E-24 | 26 | 203 | AtTET13 AT2G03840 |

|                                    |                      |          |    |     |                   |
|------------------------------------|----------------------|----------|----|-----|-------------------|
| Lj4g0013226.1                      | L.japonicus Lj1.0v1  | 1.15E-23 | 29 | 208 | AtTET13 AT2G03840 |
| Medtr2g056130.1                    | M.truncatula Mt4.0v1 | 1.62E-23 | 25 | 232 | AtTET13 AT2G03840 |
| arahy.Tifrunner.gnm1.ann1.4R894K.1 | A.hypogaea v1.0      | 2.61E-23 | 25 | 228 | AtTET13 AT2G03840 |
| Glyma.05G016200.1.p                | G.max Wm82.a4.v1     | 2.83E-23 | 27 | 226 | AtTET13 AT2G03840 |
| Ca_25832                           | C.arietinum v1.0     | 1.45E-22 | 29 | 204 | AtTET13 AT2G03840 |
| Phvul.003G180300.1.p               | P.vulgaris v2.1      | 3.38E-22 | 26 | 201 | AtTET13 AT2G03840 |
| arahy.Tifrunner.gnm1.ann1.D9WPRA.1 | A.hypogaea v1.0      | 3.64E-22 | 26 | 227 | AtTET13 AT2G03840 |
| arahy.Tifrunner.gnm1.ann1.Z53AND.1 | A.hypogaea v1.0      | 5.07E-22 | 25 | 228 | AtTET13 AT2G03840 |
| arahy.Tifrunner.gnm1.ann1.T23S8A.1 | A.hypogaea v1.0      | 8.62E-22 | 26 | 229 | AtTET13 AT2G03840 |
| arahy.Tifrunner.gnm1.ann1.H32RIC.1 | A.hypogaea v1.0      | 2.7E-21  | 29 | 234 | AtTET13 AT2G03840 |
| Phvul.004G171300.1.p               | P.vulgaris v2.1      | 7.29E-20 | 26 | 229 | AtTET13 AT2G03840 |
| Glyma.04G144500.1.p                | G.max Wm82.a4.v1     | 7.3E-20  | 25 | 221 | AtTET13 AT2G03840 |
| Ca_23646                           | C.arietinum v1.0     | 1.98E-19 | 34 | 151 | AtTET13 AT2G03840 |
| Glyma.15G207300.1.p                | G.max Wm82.a4.v1     | 2.75E-19 | 25 | 221 | AtTET13 AT2G03840 |
| Phvul.009G191200.1.p               | P.vulgaris v2.1      | 2.81E-19 | 29 | 218 | AtTET13 AT2G03840 |
| Ca_05724                           | C.arietinum v1.0     | 9.74E-19 | 35 | 136 | AtTET13 AT2G03840 |
| Lcu.2RBY.2g064540.1                | L.culinaris v1       | 1.1E-18  | 26 | 221 | AtTET13 AT2G03840 |
| Glyma.07G129100.1.p                | G.max Wm82.a4.v1     | 1.64E-18 | 25 | 253 | AtTET13 AT2G03840 |
| arahy.Tifrunner.gnm1.ann1.K1NV0H.1 | A.hypogaea v1.0      | 1.2E-17  | 44 | 84  | AtTET13 AT2G03840 |
| Lj1g0003076.1                      | L.japonicus Lj1.0v1  | 1.27E-16 | 25 | 247 | AtTET13 AT2G03840 |
| arahy.Tifrunner.gnm1.ann1.QC8A1V.1 | A.hypogaea v1.0      | 1.81E-16 | 23 | 230 | AtTET13 AT2G03840 |
| arahy.Tifrunner.gnm1.ann1.EEBB9D.1 | A.hypogaea v1.0      | 1.81E-16 | 23 | 230 | AtTET13 AT2G03840 |
| arahy.Tifrunner.gnm1.ann1.8RU08H.1 | A.hypogaea v1.0      | 5.53E-14 | 26 | 179 | AtTET13 AT2G03840 |
| arahy.Tifrunner.gnm1.ann1.Z53AND.1 | A.hypogaea v1.0      | 2.46E-04 | 28 | 97  | AtTET14 AT2G01960 |
| arahy.Tifrunner.gnm1.ann1.T23S8A.1 | A.hypogaea v1.0      | 3.61E-04 | 28 | 98  | AtTET14 AT2G01960 |
| Lj3g0001285.1                      | L.japonicus Lj1.0v1  | 5.9E-04  | 25 | 240 | AtTET14 AT2G01960 |
| Glyma.12G072100.1.p                | G.max Wm82.a4.v1     | 8.71E-04 | 25 | 244 | AtTET14 AT2G01960 |
| Medtr4g061010.1                    | M.truncatula Mt4.0v1 | 1.91E-03 | 24 | 241 | AtTET14 AT2G01960 |
| Glyma.11G152124.1.p                | G.max Wm82.a4.v1     | 2.9E-03  | 24 | 241 | AtTET14 AT2G01960 |
| arahy.Tifrunner.gnm1.ann1.PNW690.1 | A.hypogaea v1.0      | 3.32E-03 | 28 | 99  | AtTET14 AT2G01960 |
| arahy.Tifrunner.gnm1.ann1.K1NV0H.1 | A.hypogaea v1.0      | 6.14E-03 | 28 | 103 | AtTET14 AT2G01960 |
| arahy.Tifrunner.gnm1.ann1.B859HK.1 | A.hypogaea v1.0      | 1.33E-02 | 28 | 81  | AtTET14 AT2G01960 |
| Phvul.005G137500.1.p               | P.vulgaris v2.1      | 1.33E-02 | 24 | 254 | AtTET14 AT2G01960 |
| Ca_14606                           | C.arietinum v1.0     | 1.42E-02 | 23 | 241 | AtTET14 AT2G01960 |
| Lcu.2RBY.4g032690.1                | L.culinaris v1       | 2.8E-02  | 24 | 240 | AtTET14 AT2G01960 |
| Phvul.011G072100.1.p               | P.vulgaris v2.1      | 3.42E-02 | 23 | 241 | AtTET14 AT2G01960 |
| Lcu.2RBY.5g015480.1                | L.culinaris v1       | 3.56E-02 | 27 | 91  | AtTET14 AT2G01960 |

|                                    |                      |          |    |     |                   |
|------------------------------------|----------------------|----------|----|-----|-------------------|
| Glyma.09G205400.1.p                | G.max Wm82.a4.v1     | 3.56E-02 | 27 | 91  | AtTET14 AT2G01960 |
| Medtr5g030070.1                    | M.truncatula Mt4.0v1 | 3.79E-02 | 26 | 91  | AtTET14 AT2G01960 |
| Ca_11504                           | C.arietinum v1.0     | 4.84E-02 | 26 | 95  | AtTET14 AT2G01960 |
| Medtr2g056130.1                    | M.truncatula Mt4.0v1 | 6E-02    | 25 | 105 | AtTET14 AT2G01960 |
| Glyma.13G328700.1.p                | G.max Wm82.a4.v1     | 7.45E-02 | 26 | 171 | AtTET14 AT2G01960 |
| Lj4g0018138.1                      | L.japonicus Lj1.0v1  | 9.61E-02 | 26 | 97  | AtTET14 AT2G01960 |
| arahy.Tifrunner.gnm1.ann1.LZE6LN.1 | A.hypogaea v1.0      | 9.84E-02 | 24 | 237 | AtTET14 AT2G01960 |
| Phvul.005G137500.1.p               | P.vulgaris v2.1      | 4.86E-20 | 29 | 241 | AtTET15 AT5G57810 |
| Medtr4g061010.1                    | M.truncatula Mt4.0v1 | 5.48E-19 | 30 | 244 | AtTET15 AT5G57810 |
| arahy.Tifrunner.gnm1.ann1.LZE6LN.1 | A.hypogaea v1.0      | 1.19E-18 | 29 | 239 | AtTET15 AT5G57810 |
| Phvul.011G072100.1.p               | P.vulgaris v2.1      | 3.66E-18 | 30 | 244 | AtTET15 AT5G57810 |
| Lcu.2RBY.7g030120.1                | L.culinaris v1       | 8.96E-18 | 26 | 246 | AtTET15 AT5G57810 |
| Glyma.05G016200.1.p                | G.max Wm82.a4.v1     | 1.25E-17 | 25 | 240 | AtTET15 AT5G57810 |
| Glyma.11G152124.1.p                | G.max Wm82.a4.v1     | 1.71E-17 | 30 | 244 | AtTET15 AT5G57810 |
| Glyma.17G084000.1.p                | G.max Wm82.a4.v1     | 2.53E-17 | 24 | 238 | AtTET15 AT5G57810 |
| Glyma.16G145400.1.p                | G.max Wm82.a4.v1     | 6.7E-17  | 26 | 238 | AtTET15 AT5G57810 |
| Ca_14606                           | C.arietinum v1.0     | 7.67E-17 | 28 | 243 | AtTET15 AT5G57810 |
| Glyma.13G328700.1.p                | G.max Wm82.a4.v1     | 7.74E-17 | 32 | 247 | AtTET15 AT5G57810 |
| Lj3g0001285.1                      | L.japonicus Lj1.0v1  | 1.14E-16 | 30 | 244 | AtTET15 AT5G57810 |
| arahy.Tifrunner.gnm1.ann1.T23S8A.1 | A.hypogaea v1.0      | 1.16E-16 | 33 | 128 | AtTET15 AT5G57810 |
| Lj5g0000955.1                      | L.japonicus Lj1.0v1  | 3.67E-16 | 28 | 242 | AtTET15 AT5G57810 |
| Phvul.009G191200.1.p               | P.vulgaris v2.1      | 5.59E-16 | 27 | 245 | AtTET15 AT5G57810 |
| Lj1g0003076.1                      | L.japonicus Lj1.0v1  | 6.54E-16 | 27 | 242 | AtTET15 AT5G57810 |
| arahy.Tifrunner.gnm1.ann1.Z53AND.1 | A.hypogaea v1.0      | 6.69E-16 | 26 | 213 | AtTET15 AT5G57810 |
| Glyma.12G072100.1.p                | G.max Wm82.a4.v1     | 1.1E-15  | 28 | 243 | AtTET15 AT5G57810 |
| Medtr6g033335.1                    | M.truncatula Mt4.0v1 | 1.15E-15 | 27 | 237 | AtTET15 AT5G57810 |
| Phvul.009G207500.1.p               | P.vulgaris v2.1      | 1.31E-15 | 24 | 240 | AtTET15 AT5G57810 |
| arahy.Tifrunner.gnm1.ann1.AUDB51.1 | A.hypogaea v1.0      | 1.78E-15 | 30 | 244 | AtTET15 AT5G57810 |
| Lcu.2RBY.4g032690.1                | L.culinaris v1       | 1.98E-15 | 27 | 244 | AtTET15 AT5G57810 |
| Glyma.04G144500.1.p                | G.max Wm82.a4.v1     | 2.26E-15 | 25 | 249 | AtTET15 AT5G57810 |
| Glyma.02G063700.1.p                | G.max Wm82.a4.v1     | 2.91E-15 | 24 | 237 | AtTET15 AT5G57810 |
| Lj4g0025241.1                      | L.japonicus Lj1.0v1  | 2.94E-15 | 27 | 249 | AtTET15 AT5G57810 |
| Phvul.003G180300.1.p               | P.vulgaris v2.1      | 2.97E-15 | 24 | 240 | AtTET15 AT5G57810 |
| Lj4g0018138.1                      | L.japonicus Lj1.0v1  | 4.05E-15 | 32 | 126 | AtTET15 AT5G57810 |
| arahy.Tifrunner.gnm1.ann1.JZ8XUN.1 | A.hypogaea v1.0      | 4.49E-15 | 30 | 243 | AtTET15 AT5G57810 |
| Glyma.15G207300.1.p                | G.max Wm82.a4.v1     | 4.57E-15 | 25 | 249 | AtTET15 AT5G57810 |
| Lcu.2RBY.1g046720.1                | L.culinaris v1       | 4.69E-15 | 25 | 237 | AtTET15 AT5G57810 |

|                                    |                      |          |    |     |                   |
|------------------------------------|----------------------|----------|----|-----|-------------------|
| arahy.Tifrunner.gnm1.ann1.9I36N1.1 | A.hypogaea v1.0      | 4.7E-15  | 26 | 238 | AtTET15 AT5G57810 |
| arahy.Tifrunner.gnm1.ann1.V2Z0GB.1 | A.hypogaea v1.0      | 4.7E-15  | 26 | 238 | AtTET15 AT5G57810 |
| Phvul.004G071900.1.p               | P.vulgaris v2.1      | 4.74E-15 | 26 | 237 | AtTET15 AT5G57810 |
| arahy.Tifrunner.gnm1.ann1.Z4U2NE.1 | A.hypogaea v1.0      | 8.89E-15 | 26 | 242 | AtTET15 AT5G57810 |
| arahy.Tifrunner.gnm1.ann1.Z77BB1.1 | A.hypogaea v1.0      | 1.07E-14 | 26 | 242 | AtTET15 AT5G57810 |
| Ca_08501                           | C.arietinum v1.0     | 1.12E-14 | 27 | 242 | AtTET15 AT5G57810 |
| Glyma.17G069300.1.p                | G.max Wm82.a4.v1     | 1.46E-14 | 26 | 238 | AtTET15 AT5G57810 |
| Medtr8g066790.1                    | M.truncatula Mt4.0v1 | 1.47E-14 | 24 | 255 | AtTET15 AT5G57810 |
| Ca_06587                           | C.arietinum v1.0     | 1.51E-14 | 25 | 230 | AtTET15 AT5G57810 |
| Glyma.09G205400.1.p                | G.max Wm82.a4.v1     | 2.56E-14 | 24 | 238 | AtTET15 AT5G57810 |
| Glyma.13G091000.1.p                | G.max Wm82.a4.v1     | 2.91E-14 | 25 | 238 | AtTET15 AT5G57810 |
| Lcu.2RBY.7g075810.1                | L.culinaris v1       | 3E-14    | 25 | 240 | AtTET15 AT5G57810 |
| Medtr1g095530.1                    | M.truncatula Mt4.0v1 | 3.49E-14 | 32 | 125 | AtTET15 AT5G57810 |
| Lj2g0026181.1                      | L.japonicus Lj1.0v1  | 3.58E-14 | 29 | 242 | AtTET15 AT5G57810 |
| Phvul.002G140500.1.p               | P.vulgaris v2.1      | 3.85E-14 | 24 | 229 | AtTET15 AT5G57810 |
| arahy.Tifrunner.gnm1.ann1.8QTZ72.1 | A.hypogaea v1.0      | 3.88E-14 | 25 | 246 | AtTET15 AT5G57810 |
| Medtr4g112570.1                    | M.truncatula Mt4.0v1 | 4.37E-14 | 31 | 126 | AtTET15 AT5G57810 |
| Glyma.20G178700.1.p                | G.max Wm82.a4.v1     | 5.4E-14  | 27 | 242 | AtTET15 AT5G57810 |
| Lcu.2RBY.7g063730.1                | L.culinaris v1       | 6.48E-14 | 30 | 126 | AtTET15 AT5G57810 |
| arahy.Tifrunner.gnm1.ann1.2A0H1U.1 | A.hypogaea v1.0      | 7.58E-14 | 31 | 125 | AtTET15 AT5G57810 |
| arahy.Tifrunner.gnm1.ann1.XJXR2L.1 | A.hypogaea v1.0      | 7.73E-14 | 31 | 125 | AtTET15 AT5G57810 |
| Glyma.10G212400.1.p                | G.max Wm82.a4.v1     | 8.17E-14 | 27 | 242 | AtTET15 AT5G57810 |
| Phvul.002G287500.1.p               | P.vulgaris v2.1      | 1.34E-13 | 30 | 125 | AtTET15 AT5G57810 |
| Phvul.007G093400.1.p               | P.vulgaris v2.1      | 2.06E-13 | 26 | 242 | AtTET15 AT5G57810 |
| arahy.Tifrunner.gnm1.ann1.PNW690.1 | A.hypogaea v1.0      | 2.65E-13 | 28 | 123 | AtTET15 AT5G57810 |
| Lcu.2RBY.2g046220.1                | L.culinaris v1       | 2.68E-13 | 24 | 236 | AtTET15 AT5G57810 |
| Glyma.05G205600.1.p                | G.max Wm82.a4.v1     | 2.69E-13 | 30 | 145 | AtTET15 AT5G57810 |
| Glyma.08G012500.2.p                | G.max Wm82.a4.v1     | 3.05E-13 | 30 | 122 | AtTET15 AT5G57810 |
| Glyma.01G095700.1.p                | G.max Wm82.a4.v1     | 3.11E-13 | 26 | 250 | AtTET15 AT5G57810 |
| arahy.Tifrunner.gnm1.ann1.B859HK.1 | A.hypogaea v1.0      | 4.04E-13 | 28 | 123 | AtTET15 AT5G57810 |
| arahy.Tifrunner.gnm1.ann1.H32RIC.1 | A.hypogaea v1.0      | 4.21E-13 | 26 | 218 | AtTET15 AT5G57810 |
| Lcu.2RBY.4g075230.1                | L.culinaris v1       | 4.84E-13 | 29 | 125 | AtTET15 AT5G57810 |
| Ca_05724                           | C.arietinum v1.0     | 7.21E-13 | 25 | 224 | AtTET15 AT5G57810 |
| Medtr8g097280.1                    | M.truncatula Mt4.0v1 | 8.77E-13 | 29 | 125 | AtTET15 AT5G57810 |
| Lj4g0013226.1                      | L.japonicus Lj1.0v1  | 1.38E-12 | 29 | 125 | AtTET15 AT5G57810 |
| Lj4g0026647.1                      | L.japonicus Lj1.0v1  | 1.54E-12 | 25 | 251 | AtTET15 AT5G57810 |
| Phvul.002G304100.1.p               | P.vulgaris v2.1      | 2.15E-12 | 26 | 125 | AtTET15 AT5G57810 |

|                                    |                      |          |    |     |                   |
|------------------------------------|----------------------|----------|----|-----|-------------------|
| Phvul.003G284700.1.p               | P.vulgaris v2.1      | 2.92E-12 | 27 | 126 | AtTET15 AT5G57810 |
| Glyma.08G029100.1.p                | G.max Wm82.a4.v1     | 4.08E-12 | 26 | 144 | AtTET15 AT5G57810 |
| arahy.Tifrunner.gnm1.ann1.EM0Y56.1 | A.hypogaea v1.0      | 6.04E-12 | 28 | 123 | AtTET15 AT5G57810 |
| arahy.Tifrunner.gnm1.ann1.N28W6S.1 | A.hypogaea v1.0      | 6.28E-12 | 28 | 123 | AtTET15 AT5G57810 |
| Lj2g0015394.1                      | L.japonicus Lj1.0v1  | 7.81E-12 | 27 | 113 | AtTET15 AT5G57810 |
| Ca_11504                           | C.arietinum v1.0     | 9.54E-12 | 23 | 235 | AtTET15 AT5G57810 |
| Lcu.2RBY.2g064540.1                | L.culinaris v1       | 1.05E-11 | 25 | 244 | AtTET15 AT5G57810 |
| Medtr2g056130.1                    | M.truncatula Mt4.0v1 | 1.15E-11 | 33 | 126 | AtTET15 AT5G57810 |
| Phvul.003G151800.1.p               | P.vulgaris v2.1      | 1.31E-11 | 24 | 238 | AtTET15 AT5G57810 |
| Ca_23646                           | C.arietinum v1.0     | 1.68E-11 | 30 | 125 | AtTET15 AT5G57810 |
| Medtr5g030070.1                    | M.truncatula Mt4.0v1 | 2.1E-11  | 29 | 113 | AtTET15 AT5G57810 |
| Phvul.004G171300.1.p               | P.vulgaris v2.1      | 2.25E-11 | 28 | 123 | AtTET15 AT5G57810 |
| Lj2g0020248.1                      | L.japonicus Lj1.0v1  | 2.59E-11 | 27 | 133 | AtTET15 AT5G57810 |
| Glyma.04G147100.1.p                | G.max Wm82.a4.v1     | 2.69E-11 | 25 | 227 | AtTET15 AT5G57810 |
| Lcu.2RBY.5g015480.1                | L.culinaris v1       | 3.02E-11 | 27 | 113 | AtTET15 AT5G57810 |
| arahy.Tifrunner.gnm1.ann1.0ZGE19.1 | A.hypogaea v1.0      | 3.1E-11  | 27 | 240 | AtTET15 AT5G57810 |
| Glyma.07G129100.1.p                | G.max Wm82.a4.v1     | 3.14E-11 | 31 | 117 | AtTET15 AT5G57810 |
| arahy.Tifrunner.gnm1.ann1.A2QH6A.1 | A.hypogaea v1.0      | 3.17E-11 | 24 | 245 | AtTET15 AT5G57810 |
| Medtr4g129670.1                    | M.truncatula Mt4.0v1 | 5.92E-11 | 24 | 240 | AtTET15 AT5G57810 |
| Ca_25832                           | C.arietinum v1.0     | 6.13E-11 | 22 | 216 | AtTET15 AT5G57810 |
| Lcu.2RBY.4g078330.1                | L.culinaris v1       | 6.89E-11 | 27 | 125 | AtTET15 AT5G57810 |
| Ca_05887                           | C.arietinum v1.0     | 7.43E-11 | 28 | 123 | AtTET15 AT5G57810 |
| Medtr8g101600.1                    | M.truncatula Mt4.0v1 | 4.03E-10 | 26 | 132 | AtTET15 AT5G57810 |
| arahy.Tifrunner.gnm1.ann1.4R894K.1 | A.hypogaea v1.0      | 4.03E-10 | 26 | 242 | AtTET15 AT5G57810 |
| Lj4g0027264.1                      | L.japonicus Lj1.0v1  | 4.3E-10  | 28 | 123 | AtTET15 AT5G57810 |
| arahy.Tifrunner.gnm1.ann1.8RU08H.1 | A.hypogaea v1.0      | 4.04E-09 | 25 | 218 | AtTET15 AT5G57810 |
| arahy.Tifrunner.gnm1.ann1.K1NV0H.1 | A.hypogaea v1.0      | 1.12E-08 | 30 | 83  | AtTET15 AT5G57810 |
| Lj6g0020177.1                      | L.japonicus Lj1.0v1  | 4.11E-08 | 23 | 228 | AtTET15 AT5G57810 |
| Ca_03295                           | C.arietinum v1.0     | 5.73E-08 | 28 | 112 | AtTET15 AT5G57810 |
| arahy.Tifrunner.gnm1.ann1.D9WPRA.1 | A.hypogaea v1.0      | 1.45E-07 | 25 | 242 | AtTET15 AT5G57810 |
| arahy.Tifrunner.gnm1.ann1.QC8A1V.1 | A.hypogaea v1.0      | 2.1E-07  | 35 | 78  | AtTET15 AT5G57810 |
| arahy.Tifrunner.gnm1.ann1.8QTZ72.1 | A.hypogaea v1.0      | 2.85E-09 | 21 | 239 | AtTET16 AT1G18510 |
| arahy.Tifrunner.gnm1.ann1.A2QH6A.1 | A.hypogaea v1.0      | 2.07E-08 | 22 | 238 | AtTET16 AT1G18510 |
| Glyma.02G063700.1.p                | G.max Wm82.a4.v1     | 2.71E-07 | 21 | 232 | AtTET16 AT1G18510 |
| Glyma.10G212400.1.p                | G.max Wm82.a4.v1     | 2.95E-07 | 23 | 241 | AtTET16 AT1G18510 |
| Lcu.2RBY.7g075810.1                | L.culinaris v1       | 1.32E-06 | 21 | 248 | AtTET16 AT1G18510 |
| Glyma.16G145400.1.p                | G.max Wm82.a4.v1     | 1.74E-06 | 21 | 230 | AtTET16 AT1G18510 |

|                                    |                      |          |    |     |                   |
|------------------------------------|----------------------|----------|----|-----|-------------------|
| Glyma.04G147100.1.p                | G.max Wm82.a4.v1     | 5.29E-06 | 22 | 237 | AtTET16 AT1G18510 |
| Glyma.20G178700.1.p                | G.max Wm82.a4.v1     | 5.35E-06 | 22 | 241 | AtTET16 AT1G18510 |
| Lj5g0000955.1                      | L.japonicus Lj1.0v1  | 5.5E-06  | 23 | 236 | AtTET16 AT1G18510 |
| Phvul.007G093400.1.p               | P.vulgaris v2.1      | 6.75E-06 | 22 | 241 | AtTET16 AT1G18510 |
| Lj2g0026181.1                      | L.japonicus Lj1.0v1  | 1.8E-05  | 20 | 229 | AtTET16 AT1G18510 |
| Phvul.004G071900.1.p               | P.vulgaris v2.1      | 1.92E-05 | 20 | 226 | AtTET16 AT1G18510 |
| Ca_08501                           | C.arietinum v1.0     | 6.61E-05 | 22 | 241 | AtTET16 AT1G18510 |
| Medtr6g033335.1                    | M.truncatula Mt4.0v1 | 9.74E-05 | 19 | 218 | AtTET16 AT1G18510 |
| Glyma.13G328700.1.p                | G.max Wm82.a4.v1     | 1.73E-04 | 20 | 245 | AtTET16 AT1G18510 |
| arahy.Tifrunner.gnm1.ann1.Z77BB1.1 | A.hypogaea v1.0      | 2.26E-04 | 22 | 231 | AtTET16 AT1G18510 |
| Medtr4g129670.1                    | M.truncatula Mt4.0v1 | 2.3E-04  | 21 | 238 | AtTET16 AT1G18510 |
| arahy.Tifrunner.gnm1.ann1.Z4U2NE.1 | A.hypogaea v1.0      | 2.46E-04 | 22 | 231 | AtTET16 AT1G18510 |
| Ca_03295                           | C.arietinum v1.0     | 8.36E-04 | 21 | 209 | AtTET16 AT1G18510 |
| Lcu.2RBY.1g046720.1                | L.culinaris v1       | 8.65E-04 | 22 | 241 | AtTET16 AT1G18510 |
| Lj6g0020177.1                      | L.japonicus Lj1.0v1  | 1.1E-03  | 20 | 230 | AtTET16 AT1G18510 |
| Lj4g0025241.1                      | L.japonicus Lj1.0v1  | 1.18E-03 | 18 | 234 | AtTET16 AT1G18510 |
| Lcu.2RBY.2g046220.1                | L.culinaris v1       | 2.08E-03 | 18 | 218 | AtTET16 AT1G18510 |
| arahy.Tifrunner.gnm1.ann1.LZE6LN.1 | A.hypogaea v1.0      | 2.53E-03 | 20 | 271 | AtTET16 AT1G18510 |
| arahy.Tifrunner.gnm1.ann1.OZGE19.1 | A.hypogaea v1.0      | 3.42E-03 | 19 | 254 | AtTET16 AT1G18510 |
| Lcu.2RBY.4g032690.1                | L.culinaris v1       | 4.38E-03 | 19 | 232 | AtTET16 AT1G18510 |
| Ca_14606                           | C.arietinum v1.0     | 6.66E-03 | 19 | 236 | AtTET16 AT1G18510 |
| Phvul.009G191200.1.p               | P.vulgaris v2.1      | 1.75E-02 | 20 | 240 | AtTET16 AT1G18510 |
| Medtr1g095530.1                    | M.truncatula Mt4.0v1 | 2.48E-02 | 22 | 222 | AtTET16 AT1G18510 |
| arahy.Tifrunner.gnm1.ann1.4R894K.1 | A.hypogaea v1.0      | 2.83E-02 | 19 | 214 | AtTET16 AT1G18510 |
| arahy.Tifrunner.gnm1.ann1.D9WPRA.1 | A.hypogaea v1.0      | 7.84E-02 | 21 | 222 | AtTET16 AT1G18510 |
| Glyma.17G084000.1.p                | G.max Wm82.a4.v1     | 1.57E-03 | 25 | 120 | AtTET17 AT1G74045 |
| Lcu.2RBY.7g063730.1                | L.culinaris v1       | 3.1E-03  | 23 | 137 | AtTET17 AT1G74045 |
| Glyma.05G016200.1.p                | G.max Wm82.a4.v1     | 4.37E-03 | 25 | 120 | AtTET17 AT1G74045 |
| Lcu.2RBY.2g064540.1                | L.culinaris v1       | 1.13E-02 | 25 | 120 | AtTET17 AT1G74045 |
| Ca_06587                           | C.arietinum v1.0     | 1.34E-02 | 25 | 126 | AtTET17 AT1G74045 |
| Lj4g0018138.1                      | L.japonicus Lj1.0v1  | 1.43E-02 | 23 | 124 | AtTET17 AT1G74045 |
| Medtr4g112570.1                    | M.truncatula Mt4.0v1 | 1.91E-02 | 24 | 129 | AtTET17 AT1G74045 |
| arahy.Tifrunner.gnm1.ann1.H32RIC.1 | A.hypogaea v1.0      | 2.18E-02 | 22 | 128 | AtTET17 AT1G74045 |
| Phvul.009G191200.1.p               | P.vulgaris v2.1      | 2.99E-02 | 25 | 128 | AtTET17 AT1G74045 |
| Lj1g0003076.1                      | L.japonicus Lj1.0v1  | 3.96E-02 | 30 | 79  | AtTET17 AT1G74045 |
| Glyma.05G205600.1.p                | G.max Wm82.a4.v1     | 4.5E-02  | 21 | 124 | AtTET17 AT1G74045 |
| Medtr2g056130.1                    | M.truncatula Mt4.0v1 | 5.98E-02 | 23 | 117 | AtTET17 AT1G74045 |
